# Supplementary material for: Information Thermodynamics of Cytosine DNA Methylation
Source: PLoS One. 2016 Mar 10;11(3):e0150427. doi: 10.1371/journal.pone.0150427 (PMC4786201; doi:10.1371/journal.pone.0150427)
Supplement: S1 Table — The non-linear fit was performed for the genomic regions from 2, 2.5, 3, 3.5, 4, 4.5, and 5 Kb (CG methylation context). (XLSX) [file pone.0150427.s010.xlsx]

## Sheet: 2000bp
					Non-linear fits for I[R] Arabidopsis Thaliana ecotypes
							Genomic region 2000bp
	The two methods of model validation were used:
	1) Data splitting-Randomly split the data, obtain a prediction equation on one half
	of the random split and then check its predictive power (cross-validate) on the other
	sample.
	2) An estimate of the average predictive power of the equation on many other samples
	from the same population, using a formula due to Stein
Reference	J. P. Stevens, Applied Multivariate Statistics for the Social Sciences. (Routledge Academic, Fifth Edit., 2009)
	Estimate	Std. Error	t value	Pr(>|t|))	Adj.R.Square	R.Cross.val	AIC	sample.size	Sample
mu	0.121525	0.000169367	717.524	0	0.999999999726421	0.999452238216909	-857630.190665918	57763	Aa_0
shape	0.760661	0.000188078	4044.39	0	0.999999999726411
scale	4.01786	0.000906939	4430.13	0
mu1	0.104136	0.000134124	776.411	0	0.999999999819295	0.999535123922349	-880463.248691613	57892	Abd_0
shape1	0.745756	0.000164253	4540.29	0	0.999999999819289
scale1	3.99543	0.000839119	4761.46	0
mu2	0.147776	0.000140467	1052.03	0	0.999999999885003	0.99964104033799	-872365.580775164	56491	Ag_0
shape2	0.732426	0.000152284	4809.59	0	0.999999999884999
scale2	4.9395	0.0012462	3963.66	0
mu3	0.120145	0.000146522	819.979	0	0.999999999887615	0.999626825251782	-898283.005312283	57557	Ag_0_bud
shape3	0.759001	0.000152262	4984.84	0	0.999999999887611
scale3	4.54878	0.000800996	5678.91	0
mu4	0.120708	0.00013419	899.532	0	0.999999999910017	0.999725195155004	-902174.300592123	56370	Ak_1
shape4	0.766338	0.000158167	4845.12	0	0.999999999910013
scale4	4.3275	0.000953666	4537.76	0
mu5	0.124345	0.000140285	886.375	0	0.999999999821286	0.999512318913201	-863944.478405038	57372	Altai_5
shape5	0.730342	0.000163731	4460.62	0	0.99999999982128
scale5	4.41294	0.000981718	4495.12	0
mu6	0.139725	0.000225484	619.665	0	0.999999999766706	0.999461681386847	-852020.03149177	57014	Amel_1
shape6	0.791047	0.000189823	4167.28	0	0.999999999766698
scale6	4.3499	0.000820119	5303.99	0
mu7	0.133391	0.000189567	703.664	0	0.999999999766305	0.999501837282663	-863062.452423068	57599	An_1
shape7	0.773968	0.00018244	4242.31	0	0.999999999766297
scale7	4.28323	0.000907377	4720.45	0
mu8	0.125092	0.000144246	867.215	0	0.999999999879655	0.999655626254576	-884623.486331679	56561	Anholt_1
shape8	0.759665	0.000152316	4987.43	0	0.99999999987965
scale8	4.33512	0.000882421	4912.76	0
mu9	0.105095	0.000483804	217.227	0	0.999999999661986	0.999057253466404	-787311.81567793	55271	Ann_1
shape9	0.738917	0.000186614	3959.59	0	0.999999999661974
scale9	7.3475	0.00141537	5191.21	0
mu10	0.110264	0.000131259	840.049	0	0.999999999840923	0.99955950535432	-883867.392358024	57685	Anz_0
shape10	0.740452	0.000151297	4894.01	0	0.999999999840917
scale10	4.14649	0.000814919	5088.22	0
mu11	0.125499	0.00014277	879.024	0	0.999999999856655	0.999588490662107	-871499.398295407	56642	Appt_1
shape11	0.743502	0.000154676	4806.84	0	0.99999999985665
scale11	4.27139	0.000919891	4643.36	0
mu12	0.110737	0.000120593	918.267	0	0.999999999920263	0.999735645619275	-908087.288601653	56519	Ba_1
shape12	0.754774	0.000137689	5481.74	0	0.99999999992026
scale12	4.52886	0.000869055	5211.25	0
mu13	0.120105	0.000137796	871.62	0	0.999999999872285	0.999647549763453	-883360.952945947	56958	Baa_1
shape13	0.740546	0.000171825	4309.88	0	0.99999999987228
scale13	4.38274	0.00116889	3749.5	0
mu14	0.118707	0.000144044	824.099	0	0.999999999896496	0.999694608170073	-897937.478591131	56521	Benk_1
shape14	0.770112	0.000150494	5117.21	0	0.999999999896493
scale14	4.1612	0.000744148	5591.9	0
mu15	0.140183	0.000293588	477.48	0	0.999999999825936	0.999341402770416	-835940.791262114	55959	Bik_1
shape15	0.724902	0.000148673	4875.8	0	0.99999999982593
scale15	6.25611	0.000991902	6307.19	0
mu16	0.120382	0.000156819	767.651	0	0.99999999983923	0.999584506004175	-887138.816982615	57715	Bl_1
shape16	0.772586	0.000167296	4618.08	0	0.999999999839224
scale16	4.32534	0.000912608	4739.54	0
mu17	0.123786	0.000180834	684.531	0	0.999999999815908	0.999514912031146	-867374.981961575	57295	Bla_1
shape17	0.767457	0.000168563	4552.93	0	0.999999999815902
scale17	4.34884	0.000813596	5345.21	0
mu18	0.134942	0.000152293	886.069	0	0.999999999896075	0.999684994822677	-892703.216887861	56942	Boot_1
shape18	0.760663	0.000147932	5141.98	0	0.999999999896071
scale18	4.85136	0.000945361	5131.75	0
mu19	0.0763307	0.000546365	139.706	0	0.99999999987155	0.999505059085863	-904328.868863185	58570	Bor_4
shape19	0.820905	0.000164326	4995.58	0	0.999999999871545
scale19	7.4703	0.00110224	6777.39	0
mu20	0.0984777	0.000203398	484.162	0	0.999999999913207	0.999617515467147	-933791.090541606	58375	Bor_4_bud
shape20	0.765936	0.00011466	6680.08	0	0.999999999913204
scale20	5.73591	0.000660728	8681.19	0
mu21	0.137878	0.000161073	855.998	0	0.999999999777798	0.999430002555219	-858679.437724144	57656	Br_0_bud
shape21	0.744057	0.000165357	4499.69	0	0.99999999977779
scale21	4.3902	0.000862897	5087.74	0
mu22	0.120321	0.000157428	764.295	0	0.999999999910398	0.999702317194955	-918692.842170363	57676	Bs_1
shape22	0.781223	0.000146897	5318.17	0	0.999999999910395
scale22	4.72937	0.000881921	5362.58	0
mu23	0.108191	0.000173837	622.374	0	0.999999999783105	0.999517703881524	-878715.7192345	58105	Bsch_0
shape23	0.772835	0.000177206	4361.22	0	0.999999999783097
scale23	3.85019	0.000733161	5251.5	0
mu24	0.117383	0.000340785	344.449	0	0.999999999718482	0.99946541997917	-867786.417952733	58383	Bu_0
shape24	0.864948	0.000230671	3749.71	0	0.999999999718472
scale24	4.4288	0.000858816	5156.86	0
mu25	0.114511	0.000153304	746.956	0	0.999999999808688	0.999555106091309	-876360.584381011	57520	Ca_0
shape25	0.765442	0.000169358	4519.67	0	0.999999999808681
scale25	4.11317	0.000871062	4722.02	0
mu26	0.125466	0.000211247	593.932	0	0.999999999656558	0.999350892793523	-842931.310265378	57798	Cal_0
shape26	0.77789	0.000200048	3888.52	0	0.999999999656546
scale26	4.09214	0.000838008	4883.17	0
mu27	0.126063	0.000144963	869.618	0	0.999999999829539	0.999583854988511	-864753.853199596	56764	Chat_1
shape27	0.75596	0.000179247	4217.41	0	0.999999999829533
scale27	4.22841	0.00106612	3966.18	0
mu28	0.148909	0.000199216	747.474	0	0.999999999789017	0.999453652818279	-854879.432311008	57287	Chi_0
shape28	0.767911	0.00017803	4313.39	0	0.99999999978901
scale28	4.73131	0.000888945	5322.39	0
mu29	0.128051	0.000120087	1066.32	0	0.999999999942722	0.999740033345376	-906895.047044505	56169	Cnt_1
shape29	0.730774	0.000135115	5408.54	0	0.99999999994272
scale29	5.2465	0.00102637	5111.69	0
mu30	0.126235	0.000162936	774.756	0	0.999999999723172	0.999386411600803	-850332.301478284	57736	Co_1_bud
shape30	0.740363	0.000176861	4186.13	0	0.999999999723163
scale30	4.16039	0.000865514	4806.85	0
mu31	0.144876	0.000172206	841.296	0	0.999999999834481	0.999538616688989	-858479.935809046	56521	Com_1
shape31	0.75325	0.000167471	4497.8	0	0.999999999834475
scale31	4.47132	0.000838193	5334.48	0
mu32	0.117897	0.000116453	1012.4	0	0.999999999930839	0.999688040139498	-904915.537857894	56875	Cvi_0
shape32	0.702643	0.000130562	5381.67	0	0.999999999930837
scale32	5.48479	0.00101635	5396.57	0
mu33	0.126349	0.000154645	817.024	0	0.999999999859568	0.999579353682166	-886805.683926497	57572	Da_1_12
shape33	0.7552	0.000154718	4881.12	0	0.999999999859563
scale33	4.5897	0.000878576	5224.02	0
mu34	0.121122	0.000131792	919.04	0	0.999999999882094	0.99965243287218	-886115.791523436	56511	Db_1
shape34	0.753967	0.000152027	4959.42	0	0.99999999988209
scale34	4.13928	0.000835137	4956.41	0
mu35	0.142967	0.000136283	1049.05	0	0.999999999917441	0.999712473920285	-884188.568946118	56011	Di_G
shape35	0.729581	0.000159867	4563.67	0	0.999999999917438
scale35	4.95006	0.00136108	3636.87	0
mu36	0.139413	0.000206286	675.825	0	0.99999999966631	0.999293083508442	-835548.138950093	57875	Dja_1
shape36	0.752895	0.000193313	3894.69	0	0.999999999666298
scale36	4.28554	0.000922034	4647.92	0
mu37	0.162836	0.000139181	1169.96	0	0.99999999991951	0.999664661935854	-873556.86812344	55761	Ei_2
shape37	0.722827	0.00013928	5189.73	0	0.999999999919508
scale37	5.25562	0.00112893	4655.39	0
mu38	0.124768	0.000180107	692.741	0	0.999999999663039	0.999347124497057	-842123.3237757	57694	El_0
shape38	0.757667	0.000188478	4019.93	0	0.999999999663028
scale38	3.96785	0.00084522	4694.46	0
mu39	0.120783	0.000124384	971.043	0	0.999999999864363	0.99962417902115	-875530.181195302	56925	Ema_1
shape39	0.740841	0.000163899	4520.1	0	0.999999999864359
scale39	4.44677	0.00118666	3747.28	0
mu40	0.12548	0.000149115	841.499	0	0.99999999972998	0.99936327457933	-848426.973436616	57721	Ema_1_bud
shape40	0.739389	0.000164409	4497.25	0	0.999999999729971
scale40	4.30478	0.000880731	4887.74	0
mu41	0.12423	0.000190335	652.689	0	0.999999999723838	0.999425477224804	-847135.229440251	57154	En_D
shape41	0.770627	0.000187214	4116.29	0	0.999999999723828
scale41	4.07871	0.000800523	5095.06	0
mu42	0.144695	0.000198713	728.159	0	0.99999999971934	0.999351554051926	-845393.483767794	57910	Es_0
shape42	0.755213	0.000187822	4020.89	0	0.999999999719331
scale42	4.44863	0.000961113	4628.63	0
mu43	0.130348	0.000204873	636.238	0	0.99999999963107	0.999282827458614	-837457.247831265	58003	Est
shape43	0.760651	0.000193806	3924.81	0	0.999999999631057
scale43	4.11478	0.000872532	4715.9	0
mu44	0.121034	0.000157164	770.113	0	0.999999999870562	0.999621084748618	-887701.153934787	57569	Et_0
shape44	0.749218	0.000150502	4978.14	0	0.999999999870558
scale44	4.76574	0.000949548	5018.95	0
mu45	0.119867	0.000163418	733.5	0	0.999999999757846	0.99947269471055	-859947.061458764	57527	Fi_0
shape45	0.760956	0.000176706	4306.35	0	0.999999999757838
scale45	4.15298	0.000907212	4577.74	0
mu46	0.123387	0.00018423	669.746	0	0.999999999843817	0.999539044062451	-881512.751277591	57894	Fr_2
shape46	0.765998	0.000162267	4720.59	0	0.999999999843812
scale46	4.64171	0.000846953	5480.48	0
mu47	0.125533	0.000172621	727.216	0	0.999999999843462	0.999515435081446	-882044.604186896	57941	Fr_2_bud
shape47	0.764895	0.000155432	4921.09	0	0.999999999843457
scale47	4.6144	0.000801247	5759.03	0
mu48	0.126437	0.000153079	825.96	0	0.999999999831204	0.9995366592961	-871665.331006244	57422	Ga_0
shape48	0.744991	0.000159598	4667.91	0	0.999999999831198
scale48	4.46172	0.000976789	4567.75	0
mu49	0.120921	0.000142802	846.779	0	0.999999999852489	0.999587486192231	-893417.056608174	57774	Gel_1
shape49	0.76174	0.000151118	5040.71	0	0.999999999852484
scale49	4.36903	0.000803495	5437.52	0
mu50	0.140558	0.000209107	672.182	0	0.999999999765348	0.998515807381921	-852826.171888259	57748	Gie_0
shape50	0.757135	0.000179471	4218.69	0	0.99999999976534
scale50	4.7429	0.000932227	5087.71	0
mu51	0.050181	0.000348525	143.981	0	0.999999999798833	0.999556086982122	-914491.395503548	58472	Gifu_2
shape51	0.820399	0.000157208	5218.55	0	0.999999999798827
scale51	5.0547	0.000717996	7040.01	0
mu52	0.12412	0.000136707	907.925	0	0.999999999831371	0.999622064587114	-875346.573579901	57165	Got_7
shape52	0.743331	0.000162156	4584.05	0	0.999999999831366
scale52	4.08436	0.000929802	4392.72	0
mu53	0.126612	0.000135203	936.464	0	0.999999999841803	0.999607555471393	-872453.103225266	56836	Gr_1
shape53	0.73864	0.000148112	4987.04	0	0.999999999841797
scale53	4.40858	0.000958683	4598.58	0
mu54	0.121611	0.000155363	782.757	0	0.999999999784281	0.999519730941293	-869715.82432464	57488	Gre_0
shape54	0.763665	0.000169913	4494.45	0	0.999999999784274
scale54	4.05562	0.000839832	4829.08	0
mu55	0.110396	0.00012809	861.866	0	0.999999999937036	0.999792658217532	-934910.446986316	57019	Gu_0
shape55	0.765191	0.000136084	5622.91	0	0.999999999937034
scale55	4.58143	0.000805914	5684.77	0
mu56	0.134111	0.0001872	716.406	0	0.999999999711565	0.999371503176178	-838441.187579769	57471	Gy_0
shape56	0.737923	0.00018575	3972.68	0	0.999999999711555
scale56	4.2115	0.000935526	4501.74	0
mu57	0.140307	0.000176795	793.614	0	0.99999999968283	0.999295176052846	-838200.175073719	57916	HR_5_bud
shape57	0.732693	0.000172302	4252.37	0	0.999999999682819
scale57	4.52206	0.00101445	4457.66	0
mu58	0.115399	0.000177442	650.346	0	0.999999999771805	0.999483653125467	-869262.791498951	57872	Ha_0
shape58	0.771493	0.000179722	4292.7	0	0.999999999771797
scale58	4.02783	0.000806964	4991.34	0
mu59	0.123727	0.000164221	753.422	0	0.999999999833757	0.999576227745167	-877652.524900122	57327	Hey_1
shape59	0.760785	0.000167359	4545.83	0	0.999999999833751
scale59	4.15147	0.000776217	5348.33	0
mu60	0.109411	0.000140995	775.988	0	0.999999999807784	0.999508409548516	-869110.100495998	57597	Hs_0
shape60	0.733149	0.000157564	4653.03	0	0.999999999807777
scale60	4.00575	0.000783818	5110.56	0
mu61	0.124316	0.000195586	635.606	0	0.999999999608192	0.999273532876903	-833278.617981673	57861	In_0
shape61	0.750037	0.00019533	3839.84	0	0.999999999608179
scale61	4.02725	0.000880707	4572.75	0
mu62	0.120575	0.000145234	830.215	0	0.999999999827708	0.999547944265285	-865218.002461377	56925	Is_0
shape62	0.742214	0.000161652	4591.44	0	0.999999999827702
scale62	4.20028	0.000875689	4796.54	0
mu63	0.124515	0.000173207	718.879	0	0.999999999731845	0.999388157999447	-855223.230278286	57824	Is_0_bud
shape63	0.757102	0.000172545	4387.85	0	0.999999999731836
scale63	4.16556	0.000837169	4975.77	0
mu64	0.135865	0.000149529	908.623	0	0.99999999982139	0.999543884948607	-868588.677928152	57464	Je_0
shape64	0.73733	0.000171135	4308.47	0	0.999999999821384
scale64	4.4795	0.00112526	3980.85	0
mu65	0.133393	0.000178322	748.046	0	0.999999999760515	0.999477606912677	-857448.504698077	57439	Jm_0
shape65	0.762107	0.000185701	4103.94	0	0.999999999760507
scale65	4.13874	0.000860542	4809.46	0
mu66	0.124946	0.000149844	833.84	0	0.999999999840117	0.999561348773836	-874890.632392857	57531	Kas_1
shape66	0.745154	0.000146809	5075.66	0	0.999999999840112
scale66	4.69422	0.000936099	5014.66	0
mu67	0.118897	0.000161063	738.201	0	0.999999999832865	0.999584680747579	-870858.567103264	56709	Kelsterbach_4
shape67	0.769439	0.000165842	4639.6	0	0.999999999832859
scale67	4.05306	0.000750774	5398.52	0
mu68	0.124982	0.000176824	706.817	0	0.999999999855393	0.999573597519163	-885542.890145913	57597	Kil_0
shape68	0.775472	0.000165854	4675.65	0	0.999999999855388
scale68	4.60428	0.000861986	5341.47	0
mu69	0.122055	0.000129226	944.508	0	0.999999999897218	0.999657904130642	-891024.932146822	56929	Kin_0
shape69	0.739459	0.000146955	5031.88	0	0.999999999897214
scale69	4.68063	0.00108936	4296.68	0
mu70	0.121337	0.000155932	778.137	0	0.999999999829347	0.999527666056525	-879173.774486479	57823	Kin_0_bud
shape70	0.749384	0.000156821	4778.6	0	0.999999999829341
scale70	4.44401	0.000908924	4889.31	0
mu71	0.129121	0.000152258	848.041	0	0.99999999977043	0.999484648186606	-850289.375246316	57044	Kl_5
shape71	0.752092	0.000177683	4232.76	0	0.999999999770422
scale71	4.12622	0.000926187	4455.06	0
mu72	0.126835	0.000137643	921.477	0	0.999999999788025	0.999458678246133	-854928.450427486	57147	Knox_18
shape72	0.732694	0.000157943	4638.98	0	0.999999999788018
scale72	4.24617	0.000882686	4810.51	0
mu73	0.127311	0.000141606	899.046	0	0.999999999816106	0.999497601028795	-858412.925311945	57088	Kondara
shape73	0.733255	0.000155921	4702.72	0	0.9999999998161
scale73	4.38988	0.000860357	5102.4	0
mu74	0.11047	0.000138797	795.907	0	0.999999999819389	0.999604554956121	-876111.805732343	56974	Kro_0
shape74	0.769866	0.000177762	4330.89	0	0.999999999819382
scale74	3.80774	0.000874512	4354.13	0
mu75	0.126307	0.000171814	735.142	0	0.999999999700278	0.999366555558498	-841614.5891455	57423	Krot_0
shape75	0.750556	0.000181054	4145.49	0	0.999999999700267
scale75	4.1269	0.000857243	4814.15	0
mu76	0.133188	0.000183001	727.8	0	0.999999999728958	0.999394670198453	-846643.725510859	57457	Kyoto
shape76	0.755992	0.000183984	4109.02	0	0.999999999728949
scale76	4.16689	0.000865148	4816.39	0
mu77	0.137281	0.000160712	854.206	0	0.999999999805846	0.99952470089242	-858985.993218808	57251	Kz_9
shape77	0.731439	0.000176184	4151.57	0	0.999999999805839
scale77	4.41239	0.00112493	3922.38	0
mu78	0.136934	0.000174107	786.495	0	0.999999999658961	0.999303698963781	-835557.387671859	57701	La_0
shape78	0.743926	0.000185524	4009.87	0	0.999999999658949
scale78	4.16947	0.000919535	4534.33	0
mu79	0.0986252	0.00013756	716.96	0	0.99999999975734	0.999618137086258	-893254.820191735	57371	Lan_0
shape79	0.808777	0.000157495	5135.26	0	0.999999999757332
scale79	3.28511	0.000547072	6004.9	0
mu80	0.121058	0.000134032	903.204	0	0.999999999870921	0.999592351979136	-876532.141445939	57226	Ler_1
shape80	0.720757	0.000159807	4510.18	0	0.999999999870917
scale80	4.6879	0.00123852	3785.07	0
mu81	0.11722	0.000153902	761.65	0	0.99999999984364	0.99953155422319	-885539.079224578	57775	Li_2_1_bud
shape81	0.759898	0.00014923	5092.14	0	0.999999999843634
scale81	4.43849	0.000768427	5776.07	0
mu82	0.136486	0.000160438	850.707	0	0.999999999810728	0.999508967770122	-853315.866536632	56764	Litva
shape82	0.744873	0.000166137	4483.5	0	0.999999999810721
scale82	4.36874	0.000890734	4904.65	0
mu83	0.137265	0.000180658	759.803	0	0.99999999960577	0.999268821924977	-831711.306254364	57737	Litva_bud
shape83	0.740416	0.000187767	3943.26	0	0.999999999605756
scale83	3.96435	0.000866645	4574.37	0
mu84	0.13755	0.000176616	778.811	0	0.999999999630178	0.999261870715203	-832845.031927906	57763	Lm_2
shape84	0.744755	0.000184889	4028.12	0	0.999999999630165
scale84	4.11849	0.000912476	4513.53	0
mu85	0.119817	0.000167627	714.784	0	0.999999999817007	0.99954244621261	-862519.866042956	56798	Lp2_2
shape85	0.761659	0.000173766	4383.26	0	0.999999999817
scale85	4.07638	0.000792673	5142.58	0
mu86	0.116367	0.000145009	802.482	0	0.999999999944792	0.999778025886579	-937862.060019916	57590	Mc_0
shape86	0.767933	0.000133818	5738.65	0	0.99999999994479
scale86	5.21426	0.00100772	5174.29	0
mu87	0.120367	0.000191187	629.576	0	0.99999999980584	0.999510257801921	-880264.960011497	57963	Mh_0_bud
shape87	0.790139	0.000172933	4569.04	0	0.999999999805833
scale87	4.20521	0.000731223	5750.92	0
mu88	0.126553	0.000207214	610.736	0	0.99999999978121	0.999458664234262	-876145.310464917	58206	Ms_0_bud
shape88	0.79669	0.000173693	4586.77	0	0.999999999781202
scale88	4.43007	0.000775092	5715.54	0
mu89	0.119827	0.000164883	726.744	0	0.999999999730418	0.999418838571053	-855894.582307373	57748	Mz_0_bud
shape89	0.754831	0.000174051	4336.84	0	0.999999999730409
scale89	4.01864	0.000810552	4957.9	0
mu90	0.118851	0.000147031	808.34	0	0.999999999752482	0.99943500408251	-855832.865389304	57520	Nc_1_bud
shape90	0.744392	0.000170883	4356.16	0	0.999999999752473
scale90	4.03628	0.000877335	4600.61	0
mu91	0.121213	0.000162236	747.142	0	0.999999999797595	0.999460947266385	-863084.709309942	57634	Neo_6_bud
shape91	0.744047	0.000164559	4521.45	0	0.999999999797588
scale91	4.42657	0.000850341	5205.64	0
mu92	0.113051	0.000157814	716.36	0	0.999999999905493	0.999657538614819	-914270.973087769	57866	Nok_3_bud
shape92	0.774322	0.000146949	5269.32	0	0.99999999990549
scale92	4.81258	0.000778044	6185.49	0
mu93	0.154899	0.000301854	513.156	0	0.999999999336922	0.999001485896279	-807040.523676962	58233	Np_0_bud
shape93	0.795988	0.000232633	3421.65	0	0.999999999336899
scale93	4.16518	0.000951429	4377.82	0
mu94	0.117969	0.000217059	543.487	0	0.99999999979454	0.999533901485438	-891672.155490721	58308	Nw_0_bud
shape94	0.826132	0.000182143	4535.62	0	0.999999999794533
scale94	4.12173	0.000685485	6012.87	0
mu95	0.132257	0.000172135	768.33	0	0.999999999750959	0.999439138871354	-862191.848376593	58035	Ob_0_bud
shape95	0.753001	0.000170592	4414.06	0	0.99999999975095
scale95	4.31176	0.000903091	4774.45	0
mu96	0.133191	0.000208222	639.657	0	0.99999999969621	0.999373230418817	-853163.5531731	57987	Old_1_bud
shape96	0.773087	0.000184943	4180.13	0	0.999999999696199
scale96	4.25707	0.000832364	5114.43	0
mu97	0.136365	0.000146	934.01	0	0.999999999827798	0.999511604315843	-871788.581012068	57919	Ove_0_bud
shape97	0.719321	0.00013858	5190.66	0	0.999999999827792
scale97	5.02738	0.00102095	4924.21	0
mu98	0.145298	0.000156049	931.104	0	0.999999999804497	0.999526868581585	-848230.459106529	56523	Per_1
shape98	0.739497	0.000178711	4137.94	0	0.99999999980449
scale98	4.52203	0.00121621	3718.13	0
mu99	0.155896	0.00014008	1112.91	0	0.999999999889182	0.999651642109696	-874586.607060968	56357	Pi_0
shape99	0.733017	0.000152075	4820.09	0	0.999999999889179
scale99	4.96495	0.0012821	3872.52	0
mu100	0.130748	0.000190001	688.141	0	0.999999999774781	0.99941937983861	-864469.80045486	58055	Pla_0_bud
shape100	0.767356	0.000171903	4463.89	0	0.999999999774773
scale100	4.45898	0.000856838	5203.99	0
mu101	0.107143	0.000133809	800.715	0	0.999999999924935	0.999737154551128	-936718.738110767	57578	Pna_17_bud
shape101	0.783668	0.0001209	6481.93	0	0.999999999924932
scale101	4.6076	0.000648336	7106.8	0
mu102	0.137937	0.000201661	684.005	0	0.999999999671835	0.999289806566888	-845072.93800703	57982	Pog_0_bud
shape102	0.7564	0.000177144	4269.96	0	0.999999999671824
scale102	4.38399	0.000874689	5012.06	0
mu103	0.133692	0.000158023	846.03	0	0.999999999857466	0.999605950090294	-879058.155576146	57611	Pro_0_bud
shape103	0.732898	0.000153719	4767.77	0	0.999999999857461
scale103	4.9276	0.00115327	4272.73	0
mu104	0.118854	0.00015332	775.203	0	0.999999999749154	0.999535375591129	-865464.040609694	56665	Pt_0
shape104	0.781625	0.000165808	4714.05	0	0.999999999749145
scale104	3.74112	0.000700724	5338.93	0
mu105	0.130584	0.000186443	700.399	0	0.999999999676466	0.999348697563055	-840375.122159444	57658	Pu2_23
shape105	0.761345	0.000193093	3942.89	0	0.999999999676455
scale105	4.05787	0.000879034	4616.29	0
mu106	0.137285	0.000169272	811.031	0	0.999999999680122	0.999232301941076	-834045.256370134	57812	Pu2_23_bud
shape106	0.725929	0.000165896	4375.79	0	0.999999999680111
scale106	4.52757	0.000951398	4758.86	0
mu107	0.117851	0.000136645	862.459	0	0.999999999937312	0.999749421217523	-928718.929940442	57205	Pu2_7_bud
shape107	0.766598	0.000143298	5349.69	0	0.999999999937309
scale107	4.84299	0.000902339	5367.15	0
mu108	0.114347	0.000155606	734.852	0	0.999999999855121	0.999611464219275	-893270.706527226	57612	Ra_0
shape108	0.774709	0.000163547	4736.91	0	0.999999999855116
scale108	4.16395	0.000775938	5366.34	0
mu109	0.140805	0.000140268	1003.83	0	0.999999999907096	0.999670087642968	-886403.696733837	56458	Ragl_1
shape109	0.731094	0.000146296	4997.37	0	0.999999999907093
scale109	5.07702	0.00101461	5003.93	0
mu110	0.156327	0.000208409	750.096	0	0.99999999961684	0.99914562755583	-825842.832742157	58030	Ragl_1_bud
shape110	0.734453	0.000176476	4161.77	0	0.999999999616827
scale110	4.83906	0.00103604	4670.74	0
mu111	0.149244	0.000409596	364.368	0	0.999999999731913	0.999168580088197	-805883.640766642	55505	Rd_0
shape111	0.720721	0.000167905	4292.43	0	0.999999999731903
scale111	6.94801	0.00127599	5445.2	0
mu112	0.130466	0.000170999	762.961	0	0.999999999785069	0.999446226602436	-868636.674395742	57982	Rennes_1_bud
shape112	0.761405	0.000164157	4638.26	0	0.999999999785061
scale112	4.43229	0.000835697	5303.7	0
mu113	0.138364	0.000169032	818.567	0	0.999999999700428	0.999353772930645	-843617.842209532	57731	Rld_1_bud
shape113	0.738644	0.000177404	4163.63	0	0.999999999700418
scale113	4.26161	0.000935474	4555.57	0
mu114	0.154906	0.00023541	658.026	0	0.999999999676659	0.99926808490181	-841985.160189026	58154	Rmx_A02_bud
shape114	0.762561	0.000186342	4092.27	0	0.999999999676647
scale114	4.74965	0.000961436	4940.16	0
mu115	0.142442	0.000203514	699.914	0	0.999999999667215	0.999311740960943	-844453.371248599	58027	Rome_1_bud
shape115	0.760667	0.000185097	4109.56	0	0.999999999667203
scale115	4.29486	0.000902948	4756.49	0
mu116	0.1498	0.000222226	674.089	0	0.999999999706771	0.99934332951475	-843526.710629483	57713	RRS_7
shape116	0.776164	0.000193965	4001.58	0	0.999999999706761
scale116	4.50302	0.000912332	4935.72	0
mu117	0.150943	0.000195019	773.991	0	0.999999999547068	0.999109979340619	-813325.347270295	57849	Rubezhnoe_1_bud
shape117	0.726707	0.000192186	3781.26	0	0.999999999547052
scale117	4.34175	0.00103689	4187.28	0
mu118	0.126007	0.000176774	712.813	0	0.999999999795248	0.999462188552506	-867054.238838336	57875	Se_0_bud
shape118	0.765798	0.000170921	4480.42	0	0.99999999979524
scale118	4.46907	0.000829649	5386.7	0
mu119	0.114684	0.000155522	737.413	0	0.999999999819976	0.999527105235924	-880738.927974227	57840	Seattle_0
shape119	0.760231	0.000160161	4746.68	0	0.99999999981997
scale119	4.17703	0.000805419	5186.15	0
mu120	0.135946	0.000182892	743.313	0	0.999999999851427	0.999528524180526	-884216.126222169	58023	Sei_0_bud
shape120	0.75875	0.000158807	4777.82	0	0.999999999851422
scale120	4.83523	0.000854368	5659.42	0
mu121	0.148229	0.000399836	370.724	0	0.999999999394467	0.999133974086111	-829830.641948286	58653	Sg_1
shape121	0.878987	0.000259421	3388.26	0	0.999999999394446
scale121	4.37776	0.000916658	4775.79	0
mu122	0.127603	0.000143129	891.522	0	0.999999999873976	0.999650541628903	-876466.225927937	56503	Si_0
shape122	0.750838	0.000173737	4321.7	0	0.999999999873972
scale122	4.53049	0.00129504	3498.35	0
mu123	0.146531	0.000166239	881.444	0	0.999999999695636	0.99928437842616	-837605.910396746	58082	Sorbo_bud
shape123	0.722295	0.000164216	4398.43	0	0.999999999695626
scale123	4.81498	0.00108909	4421.11	0
mu124	0.173125	0.00022824	758.523	0	0.999999999528627	0.999070416286855	-816513.747326594	58184	Sp_0_bud
shape124	0.74178	0.000192308	3857.26	0	0.999999999528611
scale124	4.63632	0.00106057	4371.54	0
mu125	0.158816	0.000211208	751.94	0	0.999999999504083	0.999041737203826	-813303.421440309	58080	Sq_8_bud
shape125	0.738338	0.000186181	3965.71	0	0.999999999504066
scale125	4.55433	0.00102788	4430.78	0
mu126	0.126114	0.00014732	856.055	0	0.999999999847136	0.999562354789925	-874019.010491692	57081	Stw_0
shape126	0.75399	0.000154117	4892.34	0	0.99999999984713
scale126	4.37927	0.000877869	4988.53	0
mu127	0.14046	0.000142425	986.203	0	0.999999999831201	0.999590863505733	-859656.445268639	56470	Su_0
shape127	0.735318	0.000166407	4418.79	0	0.999999999831195
scale127	4.44772	0.00119581	3719.43	0
mu128	0.158182	0.000267418	591.517	0	0.999999999326285	0.99891418449413	-800236.372606226	58275	Sus_1_bud
shape128	0.769219	0.000223641	3439.52	0	0.999999999326262
scale128	4.29176	0.00102845	4173.02	0
mu129	0.150097	0.000274779	546.247	0	0.999999999585573	0.999192641832772	-837046.001167579	58360	Ta_0_bud
shape129	0.798419	0.000199288	4006.36	0	0.999999999585559
scale129	4.63073	0.000918267	5042.89	0
mu130	0.123494	0.000130342	947.462	0	0.999999999939159	0.999735551971614	-925387.229327967	57608	Tamm_2_bud
shape130	0.743299	0.000124324	5978.73	0	0.999999999939157
scale130	5.36247	0.0010081	5319.4	0
mu131	0.153942	0.000289017	532.639	0	0.99999999961777	0.999205389658107	-840534.463990434	58465	Tol_0_bud
shape131	0.798041	0.000199347	4003.27	0	0.999999999617757
scale131	4.74355	0.000937698	5058.72	0
mu132	0.135556	0.000188582	718.817	0	0.999999999819329	0.999481107726655	-879117.577910192	58252	Tscha_1_bud
shape132	0.765429	0.00016203	4723.99	0	0.999999999819323
scale132	4.80605	0.000871361	5515.57	0
mu133	0.153198	0.000208663	734.189	0	0.999999999521559	0.999122870337477	-822034.495056341	58185	Tu_0_bud
shape133	0.742303	0.000188514	3937.65	0	0.999999999521543
scale133	4.48773	0.00100286	4474.95	0
mu134	0.151903	0.000256721	591.705	0	0.999999999500478	0.999099264401054	-820634.909808375	58241	Ty_0_bud
shape134	0.781415	0.000206181	3789.96	0	0.999999999500461
scale134	4.40373	0.00093926	4688.51	0
mu135	0.109437	0.000160282	682.781	0	0.999999999853016	0.999607259263951	-895813.378346568	57788	Uk_1
shape135	0.778257	0.00016159	4816.23	0	0.999999999853011
scale135	4.04602	0.000704584	5742.42	0
mu136	0.138658	0.000239424	579.131	0	0.999999999686402	0.999322562395856	-851615.925329926	58174	Uk_1_bud
shape136	0.792228	0.000188874	4194.48	0	0.999999999686391
scale136	4.57264	0.000864742	5287.86	0
mu137	0.16912	0.000214879	787.049	0	0.999999999534328	0.999074472790423	-812088.813140955	57956	Uod_1_bud
shape137	0.717299	0.000185672	3863.26	0	0.999999999534312
scale137	4.87559	0.00117453	4151.09	0
mu138	0.136898	0.000264395	517.779	0	0.999999999826144	0.999493930645218	-890492.95805507	58435	Utrecht_bud
shape138	0.824023	0.000173074	4761.11	0	0.999999999826138
scale138	4.96097	0.000795539	6235.98	0
mu139	0.167817	0.000272063	616.832	0	0.99999999937044	0.998972179353864	-807872.785142143	58348	Van_0_bud
shape139	0.774249	0.000218907	3536.88	0	0.999999999370419
scale139	4.36589	0.0010091	4326.5	0
mu140	0.125178	0.000136793	915.089	0	0.99999999990333	0.999679341534793	-893665.41270586	56671	Vind_1
shape140	0.753372	0.000151854	4961.17	0	0.999999999903327
scale140	4.62204	0.00100136	4615.74	0
mu141	0.126067	0.000195168	645.941	0	0.999999999610351	0.999271576944996	-828657.355446998	57718	Wa_1
shape141	0.754014	0.000199483	3779.84	0	0.999999999610337
scale141	3.96865	0.000878357	4518.27	0
mu142	0.149495	0.000246202	607.203	0	0.999999999434741	0.999029073744427	-809429.294625115	58113	Westkar_4_bud
shape142	0.764648	0.000210621	3630.45	0	0.999999999434722
scale142	4.382	0.000999079	4386.04	0
mu143	0.156822	0.000282102	555.905	0	0.999999999476538	0.999096412211078	-821984.629202416	58306	Wl_0_bud
shape143	0.797392	0.000214666	3714.57	0	0.99999999947652
scale143	4.45091	0.000945134	4709.29	0
mu144	0.121686	0.000177559	685.329	0	0.999999999817182	0.999487433975859	-882621.803697205	58075	Ws_2_bud
shape144	0.778534	0.000159353	4885.6	0	0.999999999817175
scale144	4.45704	0.00075309	5918.34	0
mu145	0.121714	0.000175829	692.229	0	0.999999999715045	0.999404013041723	-855040.381206201	57818	Wt_5
shape145	0.765948	0.000179595	4264.86	0	0.999999999715035
scale145	4.03571	0.000807646	4996.88	0
mu146	0.11986	0.000150988	793.842	0	0.999999999912631	0.99970789639041	-904628.93530457	56562	Yo_0
shape146	0.778515	0.000145334	5356.74	0	0.999999999912628
scale146	4.3434	0.000704982	6161	0
mu147	0.118638	0.000157848	751.597	0	0.999999999765868	0.999468412928239	-863173.049636138	57751	Zdr_1
shape147	0.759015	0.000176514	4300.03	0	0.99999999976586
scale147	4.03972	0.000866763	4660.7	0
mu148	0.140747	0.000192267	732.041	0	0.999999999686143	0.999308080465918	-844480.976376581	57959	Zdr_1_bud
shape148	0.757282	0.000180031	4206.4	0	0.999999999686132
scale148	4.36429	0.000885472	4928.77	0
mu149	0.149761	0.00019577	764.986	0	0.999999999837031	0.999554828753058	-882005.437236659	57836	Er_0
shape149	0.77991	0.000157029	4966.68	0	0.999999999837025
scale149	4.99015	0.000901753	5533.83	0
mu150	0.124635	0.000160653	775.806	0	0.999999999800767	0.999472231390648	-870551.410325227	57877	Er_0_bud
shape150	0.741449	0.000157341	4712.37	0	0.99999999980076
scale150	4.42963	0.000875766	5058.01	0

## Sheet: 2500bp
					Non-linear fits for I[R] Arabidopsis Thaliana ecotypes
							Genomic region 2500bp
	The two methods of model validation were used:
	1) Data splitting-Randomly split the data, obtain a prediction equation on one half
	of the random split and then check its predictive power (cross-validate) on the other
	sample.
	2) An estimate of the average predictive power of the equation on many other samples
	from the same population, using a formula due to Stein
Reference	J. P. Stevens, Applied Multivariate Statistics for the Social Sciences. (Routledge Academic, Fifth Edit., 2009)
	Estimate	Std. Error	t value	Pr(>|t|))	Adj.R.Square	R.Cross.val	AIC	sample.size	Sample
mu	0.125983	0.000227535	553.687	0	0.999999999853638	0.999507717381355	-705853.052369962	46718	Aa_0
shape	0.773304	0.000192279	4021.79	0	0.999999999853632
scale	4.82707	0.000991968	4866.16	0
mu1	0.114056	0.000189325	602.432	0	0.999999999881922	0.999552019502895	-714170.446322468	46792	Abd_0
shape1	0.75252	0.000182423	4125.14	0	0.999999999881917
scale1	4.78352	0.00102134	4683.59	0
mu2	0.138694	0.000179687	771.862	0	0.999999999954124	0.999726932887919	-738006.757081323	46149	Ag_0
shape2	0.738184	0.000150422	4907.42	0	0.999999999954122
scale2	6.0088	0.00143255	4194.48	0
mu3	0.129452	0.000225124	575.024	0	0.999999999901428	0.999564319860113	-716566.8414555	46633	Ag_0_bud
shape3	0.77194	0.000176566	4371.97	0	0.999999999901424
scale3	5.4117	0.00102321	5288.93	0
mu4	0.11639	0.000190499	610.974	0	0.999999999952857	0.999751854680426	-750594.345795212	46043	Ak_1
shape4	0.781799	0.000148055	5280.47	0	0.999999999952855
scale4	5.21576	0.00090242	5779.75	0
mu5	0.128464	0.000204255	628.937	0	0.999999999894338	0.999538913313128	-708179.037912583	46533	Altai_5
shape5	0.742702	0.000173485	4281.07	0	0.999999999894333
scale5	5.3167	0.00108641	4893.81	0
mu6	0.144983	0.000338703	428.054	0	0.999999999793706	0.999386823772882	-681588.348883171	46342	Amel_1
shape6	0.799279	0.000214626	3724.06	0	0.999999999793697
scale6	5.07422	0.00108126	4692.87	0
mu7	0.126907	0.000238664	531.738	0	0.999999999886689	0.999567008961648	-715559.18261486	46619	An_1
shape7	0.787638	0.00019282	4084.84	0	0.999999999886684
scale7	5.18044	0.00113113	4579.9	0
mu8	0.118809	0.000202584	586.471	0	0.999999999936988	0.999711661277337	-734676.929371649	46123	Anholt_1
shape8	0.772923	0.000164781	4690.61	0	0.999999999936985
scale8	5.1958	0.000952511	5454.85	0
mu9	0.0704488	0.000668968	105.31	0	0.999999999843017	0.99923033213441	-665669.84594273	45448	Ann_1
shape9	0.765931	0.000204315	3748.78	0	0.999999999843011
scale9	9.02504	0.00172097	5244.15	0
mu10	0.114639	0.00019411	590.59	0	0.999999999881268	0.999548859321347	-712199.193427718	46698	Anz_0
shape10	0.75643	0.000176643	4282.26	0	0.999999999881263
scale10	4.9469	0.000988752	5003.18	0
mu11	0.117966	0.000200056	589.666	0	0.999999999914446	0.999624111819334	-717838.637510355	46193	Appt_1
shape11	0.758218	0.000169603	4470.54	0	0.999999999914443
scale11	5.1324	0.000982639	5223.08	0
mu12	0.109578	0.000141301	775.49	0	0.999999999975185	0.999827769153025	-777868.1018249	46105	Ba_1
shape12	0.764251	0.000127392	5999.22	0	0.999999999975184
scale12	5.52238	0.00104375	5290.9	0
mu13	0.105418	0.000166231	634.165	0	0.999999999950278	0.999721976314254	-746534.224532842	46400	Baa_1
shape13	0.759973	0.000138542	5485.49	0	0.999999999950276
scale13	5.34523	0.000936645	5706.78	0
mu14	0.108867	0.000198869	547.432	0	0.999999999942127	0.99974368865479	-743185.787719012	46104	Benk_1
shape14	0.784362	0.000173464	4521.77	0	0.999999999942124
scale14	4.9525	0.000911303	5434.53	0
mu15	0.0709101	0.000540401	131.218	0	0.999999999894418	0.999389859617411	-690674.204964143	45789	Bik_1
shape15	0.771921	0.000192215	4015.93	0	0.999999999894413
scale15	7.82423	0.0013137	5955.87	0
mu16	0.121997	0.0002179	559.878	0	0.999999999907293	0.999602048623352	-726547.482630789	46718	Bl_1
shape16	0.780121	0.000175247	4451.55	0	0.999999999907289
scale16	5.18723	0.000985202	5265.15	0
mu17	0.12411	0.000260466	476.492	0	0.999999999865477	0.999512680038859	-701453.860056011	46498	Bla_1
shape17	0.777809	0.000195782	3972.83	0	0.999999999865471
scale17	5.15484	0.00106731	4829.74	0
mu18	0.119308	0.000191133	624.216	0	0.999999999964139	0.999785639215822	-758289.101841021	46303	Boot_1
shape18	0.774622	0.000170026	4555.9	0	0.999999999964138
scale18	5.93735	0.00146887	4042.11	0
mu19	0.0440346	0.000737698	59.6919	0	0.999999999959992	0.999673886740972	-765015.973934518	47049	Bor_4
shape19	0.864754	0.000169871	5090.66	0	0.999999999959991
scale19	9.27783	0.00132204	7017.79	0
mu20	0.0809077	0.000261477	309.426	0	0.999999999973777	0.999744586052892	-791156.691111339	46970	Bor_4_bud
shape20	0.798489	0.000109013	7324.74	0	0.999999999973776
scale20	7.06673	0.000726315	9729.57	0
mu21	0.143007	0.000226108	632.472	0	0.999999999827735	0.999380050980132	-689552.787368597	46688	Br_0_bud
shape21	0.750426	0.000187322	4006.08	0	0.999999999827728
scale21	5.19883	0.00110068	4723.3	0
mu22	0.111133	0.000192141	578.394	0	0.99999999996543	0.999783324385659	-771125.909415308	46694	Bs_1
shape22	0.792024	0.00016021	4943.66	0	0.999999999965429
scale22	5.76451	0.00105595	5459.06	0
mu23	0.121165	0.000270435	448.039	0	0.999999999792136	0.999420342758503	-693873.80433451	46875	Bsch_0
shape23	0.794084	0.000216366	3670.09	0	0.999999999792127
scale23	4.54699	0.000975652	4660.46	0
mu24	0.144862	0.00057491	251.973	0	0.999999999658253	0.999258389155709	-672035.317831424	46995	Bu_0
shape24	0.88967	0.000301551	2950.31	0	0.999999999658239
scale24	5.20529	0.001247	4174.25	0
mu25	0.124335	0.000201254	617.8	0	0.999999999884802	0.999578708133041	-716822.304836992	46615	Ca_0
shape25	0.773278	0.00018363	4211.07	0	0.999999999884797
scale25	4.95324	0.00106854	4635.54	0
mu26	0.140304	0.0003352	418.567	0	0.999999999658099	0.999208449103736	-665104.382285666	46770	Cal_0
shape26	0.791748	0.000242926	3259.21	0	0.999999999658084
scale26	4.82923	0.0011652	4144.55	0
mu27	0.117471	0.000198401	592.087	0	0.999999999925653	0.99966638055343	-726237.246254178	46236	Chat_1
shape27	0.770563	0.00016597	4642.78	0	0.999999999925649
scale27	5.0959	0.000971056	5247.79	0
mu28	0.166813	0.000314685	530.095	0	0.99999999982287	0.999378383249757	-685883.693665214	46523	Chi_0
shape28	0.779098	0.000204012	3818.87	0	0.999999999822862
scale28	5.58109	0.00117807	4737.5	0
mu29	0.124895	0.000146437	852.888	0	0.999999999980265	0.999812513379269	-773331.440567071	45916	Cnt_1
shape29	0.748053	0.000121537	6154.96	0	0.999999999980264
scale29	6.42976	0.00115038	5589.26	0
mu30	0.138325	0.000265365	521.264	0	0.999999999753268	0.999297742519341	-675826.436010577	46688	Co_1_bud
shape30	0.755065	0.0002103	3590.41	0	0.999999999753257
scale30	4.95501	0.00114453	4329.29	0
mu31	0.143022	0.000244148	585.801	0	0.999999999883909	0.999535426908251	-700386.751789763	46143	Com_1
shape31	0.760354	0.000187516	4054.88	0	0.999999999883904
scale31	5.28684	0.00108478	4873.63	0
mu32	0.0958778	0.000163632	585.936	0	0.999999999981184	0.999758903872311	-780534.419633672	46314	Cvi_0
shape32	0.733174	0.000103146	7108.16	0	0.999999999981184
scale32	6.79082	0.000795498	8536.56	0
mu33	0.125017	0.000223168	560.194	0	0.999999999904552	0.999559774574775	-718818.833508587	46627	Da_1_12
shape33	0.766398	0.000167872	4565.38	0	0.999999999904548
scale33	5.52114	0.00101496	5439.75	0
mu34	0.112911	0.000182144	619.898	0	0.999999999938078	0.999716326105919	-735992.820966812	46103	Db_1
shape34	0.768976	0.00016211	4743.55	0	0.999999999938076
scale34	4.98994	0.000910004	5483.42	0
mu35	0.124632	0.00015782	789.709	0	0.99999999997462	0.99979413053706	-760542.429233491	45815	Di_G
shape35	0.75031	0.000118638	6324.39	0	0.999999999974618
scale35	6.12547	0.0011082	5527.38	0
mu36	0.154812	0.000325452	475.684	0	0.999999999682023	0.999165196881723	-660313.01540047	46783	Dja_1
shape36	0.764778	0.000237527	3219.75	0	0.99999999968201
scale36	5.03008	0.00127827	3935.08	0
mu37	0.157712	0.000181121	870.756	0	0.999999999960483	0.999699145540929	-730324.913537182	45634	Ei_2
shape37	0.731538	0.0001424	5137.2	0	0.999999999960481
scale37	6.3541	0.00114052	5571.21	0
mu38	0.125732	0.00026922	467.023	0	0.999999999744901	0.99930428571376	-677389.620344923	46700	El_0
shape38	0.767821	0.000213234	3600.83	0	0.99999999974489
scale38	4.70756	0.0010787	4364.08	0
mu39	0.120016	0.00017865	671.796	0	0.999999999943416	0.99968751044108	-735964.876041496	46336	Ema_1
shape39	0.751856	0.000151387	4966.46	0	0.999999999943413
scale39	5.39936	0.00101144	5338.3	0
mu40	0.138731	0.000246425	562.973	0	0.999999999781051	0.999299996895316	-678833.648257949	46727	Ema_1_bud
shape40	0.743402	0.000198351	3747.91	0	0.999999999781041
scale40	5.06443	0.00113994	4442.71	0
mu41	0.13948	0.000285918	487.83	0	0.999999999791902	0.999423140682592	-684776.406909575	46445	En_D
shape41	0.775719	0.000221646	3499.81	0	0.999999999791893
scale41	4.7905	0.00109235	4385.51	0
mu42	0.140273	0.00028816	486.79	0	0.999999999809301	0.999341035650272	-683342.465739756	46782	Es_0
shape42	0.76972	0.000208958	3683.61	0	0.999999999809293
scale42	5.33343	0.00118985	4482.43	0
mu43	0.149144	0.000320253	465.706	0	0.999999999634054	0.999131055988186	-659092.390209989	46827	Est
shape43	0.774609	0.000242563	3193.44	0	0.999999999634038
scale43	4.86521	0.00122832	3960.88	0
mu44	0.12056	0.000179341	672.24	0	0.999999999956806	0.999743809418437	-752836.522064009	46632	Et_0
shape44	0.756892	0.000161882	4675.57	0	0.999999999956804
scale44	5.84281	0.00139077	4201.14	0
mu45	0.130334	0.000211053	617.539	0	0.999999999881304	0.999564909407313	-713563.160661458	46629	Fi_0
shape45	0.768573	0.000186437	4122.43	0	0.999999999881299
scale45	4.99773	0.00103206	4842.49	0
mu46	0.134718	0.00028357	475.08	0	0.999999999882423	0.999535469614665	-708034.61516953	46773	Fr_2
shape46	0.777219	0.000196181	3961.75	0	0.999999999882418
scale46	5.54494	0.00115251	4811.17	0
mu47	0.138958	0.000278176	499.533	0	0.999999999858448	0.999468445384804	-699625.544343784	46804	Fr_2_bud
shape47	0.772263	0.000200393	3853.75	0	0.999999999858442
scale47	5.48637	0.00115538	4748.53	0
mu48	0.117567	0.000209323	561.654	0	0.999999999910765	0.999597122056865	-719685.725141872	46577	Ga_0
shape48	0.756473	0.000167804	4508.06	0	0.999999999910761
scale48	5.34579	0.00102823	5199.04	0
mu49	0.123729	0.000225587	548.478	0	0.999999999873288	0.999502380920042	-712517.895945491	46703	Gel_1
shape49	0.778781	0.000173426	4490.57	0	0.999999999873283
scale49	5.17821	0.000948853	5457.34	0
mu50	0.149646	0.00028084	532.852	0	0.999999999838467	0.999378003225277	-689856.704663491	46727	Gie_0
shape50	0.762994	0.000192878	3955.85	0	0.999999999838461
scale50	5.67627	0.00118323	4797.26	0
mu51	0.00264472	0.000552353	4.7881	1.68882e-06	0.999999999832182	0.999530563886298	-730301.586255847	47025	Gifu_2
shape51	0.869509	0.000197941	4392.77	0	0.999999999832175
scale51	6.33971	0.00103096	6149.36	0
mu52	0.115075	0.000169717	678.039	0	0.999999999943216	0.999733157601536	-745263.847376102	46445	Got_7
shape52	0.761883	0.000166962	4563.22	0	0.999999999943213
scale52	5.03084	0.00113612	4428.1	0
mu53	0.124627	0.000157778	789.888	0	0.999999999947469	0.999749631702375	-744844.950648843	46276	Gr_1
shape53	0.750111	0.000159819	4693.51	0	0.999999999947466
scale53	5.39023	0.00127636	4223.14	0
mu54	0.115466	0.000193488	596.759	0	0.999999999905575	0.999622113650439	-726434.589644423	46580	Gre_0
shape54	0.770757	0.000172683	4463.41	0	0.999999999905571
scale54	4.88202	0.000924292	5281.9	0
mu55	0.0963646	0.000144321	667.71	0	0.999999999979505	0.999851431269861	-795847.652810365	46375	Gu_0
shape55	0.781525	0.000129651	6027.9	0	0.999999999979504
scale55	5.61002	0.0010199	5500.56	0
mu56	0.142367	0.000289696	491.434	0	0.999999999771953	0.999312128323327	-673721.209240905	46603	Gy_0
shape56	0.75169	0.00021949	3424.72	0	0.999999999771943
scale56	5.01942	0.00122453	4099.05	0
mu57	0.15699	0.000257975	608.546	0	0.999999999779883	0.999270508945375	-676901.226859132	46815	HR_5_bud
shape57	0.741515	0.000197327	3757.8	0	0.999999999779873
scale57	5.44976	0.00129693	4202.03	0
mu58	0.114803	0.00025416	451.695	0	0.999999999833026	0.999470667535644	-700595.695916799	46781	Ha_0
shape58	0.78621	0.000203766	3858.4	0	0.999999999833019
scale58	4.77102	0.000982657	4855.23	0
mu59	0.120712	0.000238029	507.133	0	0.999999999863935	0.999536798953338	-704994.991573687	46546	Hey_1
shape59	0.775351	0.000196394	3947.94	0	0.999999999863929
scale59	4.89556	0.00101491	4823.64	0
mu60	0.11409	0.00021182	538.617	0	0.999999999856186	0.999503915130125	-700032.338383314	46636	Hs_0
shape60	0.742804	0.00019	3909.5	0	0.99999999985618
scale60	4.75735	0.001045	4552.47	0
mu61	0.132885	0.000274126	484.76	0	0.999999999707563	0.999264123674594	-669507.303059321	46750	In_0
shape61	0.760024	0.000225678	3367.74	0	0.99999999970755
scale61	4.77641	0.00117741	4056.7	0
mu62	0.124782	0.000205217	608.05	0	0.99999999989129	0.999559775358251	-708382.450059979	46327	Is_0
shape62	0.753506	0.00017694	4258.55	0	0.999999999891285
scale62	4.99038	0.00100768	4952.34	0
mu63	0.13453	0.000242482	554.804	0	0.999999999816131	0.999407158998237	-691757.860674844	46752	Is_0_bud
shape63	0.761305	0.000199507	3815.93	0	0.999999999816124
scale63	4.91421	0.00105963	4637.66	0
mu64	0.132657	0.000198618	667.902	0	0.999999999915051	0.999601093552446	-721920.843509053	46603	Je_0
shape64	0.746893	0.000171253	4361.34	0	0.999999999915048
scale64	5.43574	0.00120111	4525.6	0
mu65	0.133114	0.000236232	563.488	0	0.999999999832868	0.999458987030915	-695632.22596116	46600	Jm_0
shape65	0.769623	0.000200147	3845.28	0	0.99999999983286
scale65	4.84486	0.00103279	4691.04	0
mu66	0.121348	0.000164982	735.52	0	0.999999999944587	0.999707042679624	-741750.645154362	46626	Kas_1
shape66	0.757959	0.000166419	4554.51	0	0.999999999944584
scale66	5.75256	0.00147293	3905.51	0
mu67	0.118919	0.000218338	544.657	0	0.999999999892068	0.999619076458797	-712477.688146198	46174	Kelsterbach_4
shape67	0.779187	0.000192382	4050.21	0	0.999999999892063
scale67	4.79706	0.000975788	4916.09	0
mu68	0.138325	0.000262004	527.952	0	0.999999999899167	0.999573378799302	-716685.128739513	46632	Kil_0
shape68	0.777851	0.000184346	4219.51	0	0.999999999899163
scale68	5.41168	0.00105022	5152.88	0
mu69	0.123838	0.000166984	741.614	0	0.999999999959446	0.999728073501689	-751590.138622465	46352	Kin_0
shape69	0.749943	0.000135039	5553.52	0	0.999999999959445
scale69	5.65856	0.000946113	5980.84	0
mu70	0.131273	0.000222934	588.841	0	0.99999999989675	0.999544604128707	-717117.75516881	46769	Kin_0_bud
shape70	0.757472	0.000169482	4469.35	0	0.999999999896745
scale70	5.31366	0.00101661	5226.85	0
mu71	0.133916	0.000257494	520.073	0	0.999999999844941	0.999499818684374	-691699.310030797	46340	Kl_5
shape71	0.76147	0.000215033	3541.18	0	0.999999999844934
scale71	4.88397	0.00114206	4276.47	0
mu72	0.133456	0.000221414	602.747	0	0.999999999845035	0.999462850827862	-692408.495271032	46430	Knox_18
shape72	0.742564	0.000189302	3922.65	0	0.999999999845029
scale72	5.03172	0.00110502	4553.5	0
mu73	0.132343	0.000223657	591.724	0	0.999999999854461	0.999463714581603	-692159.138242329	46421	Kondara
shape73	0.740134	0.000190834	3878.41	0	0.999999999854454
scale73	5.17776	0.00113455	4563.7	0
mu74	0.103372	0.000196325	526.537	0	0.99999999990505	0.999648911933754	-726548.083308509	46367	Kro_0
shape74	0.782782	0.000175162	4468.9	0	0.999999999905046
scale74	4.51847	0.000855425	5282.13	0
mu75	0.134561	0.000259658	518.225	0	0.999999999771442	0.999346962189374	-677782.751534485	46545	Krot_0
shape75	0.757198	0.000213935	3539.39	0	0.999999999771433
scale75	4.86449	0.00114073	4264.36	0
mu76	0.138417	0.000266891	518.627	0	0.999999999808179	0.999420094256316	-685314.894492744	46589	Kyoto
shape76	0.760682	0.000215116	3536.16	0	0.999999999808171
scale76	4.90261	0.00115103	4259.31	0
mu77	0.126025	0.000197066	639.507	0	0.999999999905901	0.999557217428182	-714181.223358999	46478	Kz_9
shape77	0.745749	0.000161492	4617.87	0	0.999999999905897
scale77	5.32031	0.0010606	5016.31	0
mu78	0.147926	0.000261348	566.011	0	0.999999999744976	0.999262813349166	-672728.611136056	46729	La_0
shape78	0.749349	0.000212289	3529.85	0	0.999999999744965
scale78	4.93336	0.00118072	4178.26	0
mu79	0.0949866	0.000172955	549.2	0	0.999999999887602	0.999694350151296	-745310.715105808	46589	Lan_0
shape79	0.82369	0.000173688	4742.36	0	0.999999999887597
scale79	3.91268	0.000708351	5523.65	0
mu80	0.123303	0.000168458	731.955	0	0.999999999944407	0.999654325655519	-733062.611017351	46442	Ler_1
shape80	0.731046	0.000145153	5036.36	0	0.999999999944404
scale80	5.75765	0.00112999	5095.31	0
mu81	0.12612	0.000227459	554.473	0	0.999999999888813	0.999534999261287	-715218.990629073	46760	Li_2_1_bud
shape81	0.764579	0.000173392	4409.53	0	0.999999999888808
scale81	5.24316	0.000982185	5338.25	0
mu82	0.134674	0.000230077	585.344	0	0.999999999890776	0.99956843745282	-703638.373573686	46256	Litva
shape82	0.751369	0.000191333	3927.02	0	0.999999999890771
scale82	5.20162	0.00114203	4554.72	0
mu83	0.149185	0.000275961	540.602	0	0.99999999964756	0.99918668991137	-660749.26487845	46724	Litva_bud
shape83	0.744793	0.000231523	3216.93	0	0.999999999647545
scale83	4.6587	0.00121201	3843.78	0
mu84	0.139994	0.000260858	536.666	0	0.999999999747541	0.999259868513573	-674460.061912514	46735	Lm_2
shape84	0.756204	0.000208007	3635.47	0	0.99999999974753
scale84	4.91633	0.00113109	4346.54	0
mu85	0.122332	0.000248212	492.853	0	0.999999999852836	0.999510215775655	-696419.696680778	46299	Lp2_2
shape85	0.770778	0.000203363	3790.15	0	0.99999999985283
scale85	4.74107	0.00103168	4595.49	0
mu86	0.11594	0.000170235	681.058	0	0.999999999976506	0.99981146451785	-783019.306580612	46654	Mc_0
shape86	0.775357	0.00013251	5851.3	0	0.999999999976505
scale86	6.27337	0.00106262	5903.7	0
mu87	0.13372	0.000296301	451.298	0	0.999999999831032	0.999447849971949	-700277.54825812	46829	Mh_0_bud
shape87	0.80395	0.000203832	3944.18	0	0.999999999831025
scale87	4.9783	0.000984383	5057.28	0
mu88	0.139026	0.000327955	423.916	0	0.999999999828249	0.999428808798199	-701026.55330932	46932	Ms_0_bud
shape88	0.811719	0.000209285	3878.54	0	0.999999999828241
scale88	5.29445	0.00105403	5023.05	0
mu89	0.126517	0.000237711	532.231	0	0.999999999791799	0.999380184911213	-687243.167309412	46730	Mz_0_bud
shape89	0.761442	0.000201352	3781.65	0	0.999999999791791
scale89	4.74203	0.00103443	4584.18	0
mu90	0.125753	0.000211912	593.419	0	0.999999999843442	0.999458697731567	-697702.527546913	46616	Nc_1_bud
shape90	0.752506	0.000187183	4020.16	0	0.999999999843436
scale90	4.81116	0.00102403	4698.27	0
mu91	0.127108	0.000262028	485.094	0	0.999999999820324	0.999399371762187	-687268.392604675	46654	Neo_6_bud
shape91	0.758143	0.000202076	3751.77	0	0.999999999820317
scale91	5.2599	0.00117476	4477.43	0
mu92	0.126863	0.000240069	528.445	0	0.999999999919686	0.999601440689897	-729193.134194927	46770	Nok_3_bud
shape92	0.783062	0.000168818	4638.49	0	0.999999999919683
scale92	5.74406	0.00101345	5667.81	0
mu93	0.180066	0.000433349	415.523	0	0.999999999389056	0.998829265682515	-636221.630401311	46904	Np_0_bud
shape93	0.802753	0.000276903	2899.04	0	0.99999999938903
scale93	4.89614	0.00131201	3731.78	0
mu94	0.123558	0.000340008	363.398	0	0.999999999811111	0.999472657135738	-704903.912586587	46940	Nw_0_bud
shape94	0.843995	0.000220122	3834.22	0	0.999999999811103
scale94	4.86602	0.000945504	5146.48	0
mu95	0.139183	0.00023264	598.277	0	0.999999999852685	0.999434040844934	-703088.337014504	46856	Ob_0_bud
shape95	0.761043	0.000178068	4273.88	0	0.999999999852679
scale95	5.16972	0.00104748	4935.36	0
mu96	0.134429	0.000308344	435.971	0	0.99999999974029	0.999273159357454	-679228.667042415	46852	Old_1_bud
shape96	0.78455	0.000214503	3657.52	0	0.999999999740279
scale96	5.0612	0.0011091	4563.35	0
mu97	0.144769	0.000181811	796.259	0	0.999999999932388	0.999628353030754	-730387.819625716	46793	Ove_0_bud
shape97	0.727034	0.000145988	4980.11	0	0.999999999932385
scale97	6.12831	0.00130142	4708.94	0
mu98	0.144689	0.000202724	713.723	0	0.99999999990119	0.999578810710595	-707950.254179224	46174	Per_1
shape98	0.748432	0.000175411	4266.75	0	0.999999999901186
scale98	5.43679	0.0011717	4640.1	0
mu99	0.14208	0.000187914	756.094	0	0.999999999940296	0.999665137655072	-726033.474906018	46039	Pi_0
shape99	0.746732	0.000151217	4938.16	0	0.999999999940294
scale99	5.99905	0.0011499	5217.01	0
mu100	0.141162	0.000291794	483.772	0	0.999999999816721	0.999343091946269	-689993.716433446	46865	Pla_0_bud
shape100	0.779942	0.000199136	3916.64	0	0.999999999816713
scale100	5.3476	0.00111695	4787.7	0
mu101	0.109429	0.000167354	653.875	0	0.999999999969891	0.999798069154147	-785029.931183708	46657	Pna_17_bud
shape101	0.795378	0.000122125	6512.84	0	0.999999999969889
scale101	5.54571	0.000753335	7361.55	0
mu102	0.156321	0.000292078	535.203	0	0.999999999728707	0.999217004396708	-673537.568761088	46813	Pog_0_bud
shape102	0.765213	0.000206468	3706.21	0	0.999999999728696
scale102	5.23667	0.00116795	4483.65	0
mu103	0.126059	0.000178623	705.731	0	0.999999999952141	0.99971562387669	-745791.399593081	46693	Pro_0_bud
shape103	0.744361	0.000160365	4641.66	0	0.999999999952139
scale103	6.05127	0.00146544	4129.31	0
mu104	0.120351	0.000203177	592.343	0	0.999999999847425	0.999568030075605	-711768.409579786	46153	Pt_0
shape104	0.787004	0.000179167	4392.57	0	0.999999999847418
scale104	4.40715	0.000810086	5440.35	0
mu105	0.137429	0.00028854	476.292	0	0.999999999748462	0.999299997991348	-674712.277095959	46680	Pu2_23
shape105	0.777637	0.000223672	3476.68	0	0.999999999748451
scale105	4.83885	0.00113326	4269.85	0
mu106	0.14914	0.000254021	587.118	0	0.999999999786981	0.999248216113707	-675081.529744418	46722	Pu2_23_bud
shape106	0.733309	0.000192349	3812.39	0	0.999999999786972
scale106	5.43809	0.00123769	4393.73	0
mu107	0.119731	0.000180055	664.968	0	0.999999999962453	0.999754229106399	-761197.872546141	46461	Pu2_7_bud
shape107	0.774476	0.000138504	5591.72	0	0.999999999962452
scale107	5.80417	0.000925739	6269.77	0
mu108	0.119851	0.000251523	476.502	0	0.999999999888853	0.999598529042443	-718936.300459816	46665	Ra_0
shape108	0.791433	0.000193329	4093.7	0	0.999999999888848
scale108	4.95288	0.000964296	5136.26	0
mu109	0.130965	0.000161512	810.873	0	0.999999999976519	0.999801492174304	-770050.022620672	46083	Ragl_1
shape109	0.744716	0.000124328	5989.92	0	0.999999999976518
scale109	6.2371	0.00105778	5896.4	0
mu110	0.186457	0.000292113	638.305	0	0.999999999689199	0.999054281328491	-658527.284260563	46843	Ragl_1_bud
shape110	0.738027	0.000203318	3629.92	0	0.999999999689185
scale110	5.78104	0.00138331	4179.14	0
mu111	0.100665	0.000580239	173.489	0	0.999999999873164	0.999325867841656	-679635.88049921	45582	Rd_0
shape111	0.754518	0.000185425	4069.13	0	0.999999999873159
scale111	8.6239	0.0015515	5558.43	0
mu112	0.152517	0.000271144	562.495	0	0.999999999820428	0.999387897060781	-692994.261055889	46856	Rennes_1_bud
shape112	0.769796	0.000196765	3912.25	0	0.999999999820421
scale112	5.27578	0.00111569	4728.72	0
mu113	0.142661	0.000230753	618.24	0	0.999999999809613	0.999355848381759	-686096.312935214	46690	Rld_1_bud
shape113	0.74403	0.00018967	3922.75	0	0.999999999809605
scale113	5.07707	0.00111991	4533.48	0
mu114	0.175435	0.000319751	548.661	0	0.999999999702679	0.999132712443897	-665450.703844728	46920	Rmx_A02_bud
shape114	0.770469	0.000216513	3558.53	0	0.999999999702667
scale114	5.63433	0.00130323	4323.35	0
mu115	0.15002	0.000274994	545.54	0	0.999999999781425	0.999293961419431	-683610.190939536	46836	Rome_1_bud
shape115	0.771918	0.000199656	3866.23	0	0.999999999781416
scale115	5.18482	0.00112499	4608.76	0
mu116	0.165614	0.000327386	505.869	0	0.999999999779746	0.999316613948091	-678456.15572238	46684	RRS_7
shape116	0.785399	0.000227018	3459.63	0	0.999999999779736
scale116	5.35016	0.00122168	4379.35	0
mu117	0.166987	0.000278304	600.015	0	0.999999999680598	0.999070876304842	-656103.089321157	46755	Rubezhnoe_1_bud
shape117	0.733337	0.000213962	3427.41	0	0.999999999680584
scale117	5.1928	0.00130798	3970.09	0
mu118	0.142749	0.000295585	482.937	0	0.99999999980915	0.999374621962328	-685906.552328705	46749	Se_0_bud
shape118	0.77517	0.00021228	3651.65	0	0.999999999809141
scale118	5.26368	0.00116398	4522.15	0
mu119	0.119223	0.000218729	545.074	0	0.99999999988268	0.99954007183933	-714628.200053678	46751	Seattle_0
shape119	0.771645	0.000178715	4317.73	0	0.999999999882675
scale119	5.00419	0.000973218	5141.9	0
mu120	0.140342	0.000273489	513.156	0	0.999999999880014	0.999460020397802	-706436.066947643	46854	Sei_0_bud
shape120	0.76777	0.000175951	4363.55	0	0.999999999880009
scale120	5.77164	0.00108504	5319.31	0
mu121	0.183511	0.00062101	295.504	0	0.999999999449779	0.99902404466968	-653730.496878027	47080	Sg_1
shape121	0.893232	0.000320987	2782.77	0	0.999999999449756
scale121	5.17374	0.00131358	3938.65	0
mu122	0.117563	0.000173868	676.163	0	0.999999999958003	0.999757222808213	-750187.879330652	46157	Si_0
shape122	0.761661	0.000142001	5363.78	0	0.999999999958001
scale122	5.52655	0.00106277	5200.14	0
mu123	0.161536	0.000257152	628.171	0	0.999999999802981	0.999271051850275	-678679.699197971	46881	Sorbo_bud
shape123	0.731036	0.000187184	3905.44	0	0.999999999802973
scale123	5.86023	0.00142143	4122.78	0
mu124	0.190811	0.000335153	569.324	0	0.999999999601451	0.998934664003707	-648353.53587609	46927	Sp_0_bud
shape124	0.749065	0.000224007	3343.94	0	0.999999999601434
scale124	5.5089	0.00142157	3875.23	0
mu125	0.176931	0.000315471	560.849	0	0.99999999958468	0.998936039548074	-646532.257037143	46854	Sq_8_bud
shape125	0.747423	0.000220225	3393.92	0	0.999999999584662
scale125	5.46645	0.00139934	3906.45	0
mu126	0.124582	0.00021923	568.273	0	0.999999999902399	0.999599042087053	-714558.721467056	46408	Stw_0
shape126	0.763943	0.000180951	4221.83	0	0.999999999902395
scale126	5.18599	0.00102892	5040.22	0
mu127	0.134475	0.000182259	737.826	0	0.999999999931984	0.999675003686998	-726570.040811998	46074	Su_0
shape127	0.7474	0.000161126	4638.6	0	0.999999999931981
scale127	5.43021	0.00113962	4764.92	0
mu128	0.18607	0.00040617	458.109	0	0.999999999412061	0.998800135490926	-633491.474739779	46945	Sus_1_bud
shape128	0.779101	0.000274242	2840.93	0	0.999999999412035
scale128	5.0778	0.00143192	3546.14	0
mu129	0.184402	0.000418748	440.365	0	0.999999999637284	0.999088856869559	-662040.685856305	46960	Ta_0_bud
shape129	0.806016	0.000241723	3334.46	0	0.999999999637269
scale129	5.4905	0.00127773	4297.06	0
mu130	0.126739	0.000170751	742.245	0	0.999999999973599	0.999766326993619	-770608.637926337	46655	Tamm_2_bud
shape130	0.754639	0.000127146	5935.21	0	0.999999999973598
scale130	6.53049	0.00108241	6033.31	0
mu131	0.183065	0.000418893	437.022	0	0.999999999613162	0.999034490684733	-657851.064057781	47024	Tol_0_bud
shape131	0.811988	0.000246219	3297.83	0	0.999999999613145
scale131	5.64345	0.00133202	4236.77	0
mu132	0.158757	0.000304601	521.198	0	0.99999999982494	0.999356510002252	-692510.047401597	46944	Tscha_1_bud
shape132	0.775493	0.000195036	3976.14	0	0.999999999824932
scale132	5.71982	0.00117898	4851.52	0
mu133	0.170147	0.00029729	572.327	0	0.999999999604039	0.998997497873409	-653955.040380231	46924	Tu_0_bud
shape133	0.748509	0.000216643	3455.04	0	0.999999999604023
scale133	5.35474	0.00132333	4046.42	0
mu134	0.174106	0.000402181	432.903	0	0.999999999472604	0.998862294262986	-641086.690696639	46931	Ty_0_bud
shape134	0.792767	0.000259898	3050.3	0	0.999999999472581
scale134	5.21458	0.00135513	3848.02	0
mu135	0.11528	0.000275002	419.197	0	0.999999999864345	0.99957015037705	-711595.803372902	46750	Uk_1
shape135	0.793113	0.000207287	3826.15	0	0.99999999986434
scale135	4.76573	0.00100355	4748.87	0
mu136	0.149995	0.000356736	420.466	0	0.999999999729646	0.999237683947742	-676364.889732712	46911	Uk_1_bud
shape136	0.801476	0.000221173	3623.76	0	0.999999999729635
scale136	5.42448	0.00117479	4617.42	0
mu137	0.186874	0.000285501	654.546	0	0.999999999639543	0.998987545051192	-649712.331496006	46792	Uod_1_bud
shape137	0.723963	0.000205704	3519.43	0	0.999999999639528
scale137	5.88337	0.00157286	3740.56	0
mu138	0.170423	0.000422124	403.728	0	0.999999999813782	0.999364268089736	-695971.926867066	47005	Utrecht_bud
shape138	0.844082	0.000220551	3827.16	0	0.999999999813774
scale138	5.90079	0.00114818	5139.26	0
mu139	0.194697	0.000412902	471.534	0	0.999999999351718	0.998720293313063	-631312.087584101	46988	Van_0_bud
shape139	0.784157	0.000267111	2935.69	0	0.99999999935169
scale139	5.15814	0.00140716	3665.64	0
mu140	0.112597	0.000179561	627.067	0	0.999999999958141	0.999736264273657	-750223.874973316	46198	Vind_1
shape140	0.764381	0.000141271	5410.74	0	0.999999999958139
scale140	5.58358	0.000909219	6141.08	0
mu141	0.138017	0.000314296	439.129	0	0.999999999689722	0.999232899236581	-663534.150166863	46688	Wa_1
shape141	0.763995	0.000239498	3189.98	0	0.999999999689708
scale141	4.6685	0.00120048	3888.86	0
mu142	0.18581	0.00038396	483.93	0	0.999999999450182	0.998837216547658	-636851.121980537	46888	Westkar_4_bud
shape142	0.774028	0.000259918	2977.97	0	0.999999999450158
scale142	5.17157	0.00140385	3683.83	0
mu143	0.187099	0.000420464	444.984	0	0.999999999529453	0.998949230109907	-649164.316669934	46951	Wl_0_bud
shape143	0.805679	0.000255194	3157.13	0	0.999999999529433
scale143	5.27247	0.00129741	4063.86	0
mu144	0.145774	0.000274469	531.114	0	0.999999999849936	0.999449990420669	-704007.26795194	46846	Ws_2_bud
shape144	0.787474	0.000189103	4164.27	0	0.999999999849929
scale144	5.30331	0.00102254	5186.44	0
mu145	0.127515	0.000253545	502.929	0	0.999999999800857	0.999411784166382	-690957.278618216	46743	Wt_5
shape145	0.772396	0.000205126	3765.46	0	0.999999999800849
scale145	4.78911	0.00104189	4596.57	0
mu146	0.11924	0.000219872	542.318	0	0.999999999938605	0.999717611506849	-737699.463961821	46144	Yo_0
shape146	0.786843	0.000178593	4405.78	0	0.999999999938603
scale146	5.11132	0.000925786	5521.07	0
mu147	0.121	0.000233202	518.864	0	0.999999999847481	0.999475528268336	-701176.784045377	46739	Zdr_1
shape147	0.773528	0.00019456	3975.78	0	0.999999999847474
scale147	4.8103	0.00100341	4793.95	0
mu148	0.157404	0.000280002	562.155	0	0.999999999745204	0.999248361702081	-674235.943958019	46827	Zdr_1_bud
shape148	0.763997	0.000211274	3616.15	0	0.999999999745193
scale148	5.15809	0.00117656	4384.06	0
mu149	0.152329	0.000253162	601.708	0	0.999999999925051	0.999650179532212	-732747.566172188	46785	Er_0
shape149	0.793491	0.000178026	4457.15	0	0.999999999925047
scale149	6.0752	0.00127736	4756.07	0
mu150	0.126257	0.000224384	562.681	0	0.999999999852967	0.999444289916614	-700419.70382487	46796	Er_0_bud
shape150	0.755428	0.000178013	4243.67	0	0.999999999852961
scale150	5.33398	0.00106282	5018.71	0

## Sheet: 2750bp
					Non-linear fits for I[R] Arabidopsis Thaliana ecotypes
							Genomic region 2750bp
	The two methods of model validation were used:
	1) Data splitting-Randomly split the data, obtain a prediction equation on one half
	of the random split and then check its predictive power (cross-validate) on the other
	sample.
	2) An estimate of the average predictive power of the equation on many other samples
	from the same population, using a formula due to Stein
Reference	J. P. Stevens, Applied Multivariate Statistics for the Social Sciences. (Routledge Academic, Fifth Edit., 2009)
	Estimate	Std. Error	t value	Pr(>|t|))	Adj.R.Square	R.Cross.val	AIC	sample.size	Sample
mu	0.12312	0.00026613	462.632	0	0.999999999876874	0.99951740457034	-644727.523167566	42623	Aa_0
shape	0.780839	0.000201218	3880.57	0	0.999999999876869
scale	5.23858	0.00112277	4665.76	0
mu1	0.115455	0.000226689	509.31	0	0.999999999895696	0.9995384828689	-649863.436152268	42670	Abd_0
shape1	0.763679	0.000187556	4071.74	0	0.999999999895692
scale1	5.20314	0.00109074	4770.26	0
mu2	0.136677	0.000221636	616.674	0	0.999999999965732	0.999718742253522	-680785.460993136	42223	Ag_0
shape2	0.751802	0.000143938	5223.1	0	0.99999999996573
scale2	6.54254	0.00121116	5401.87	0
mu3	0.134508	0.000297048	452.815	0	0.999999999902227	0.999516216885468	-646980.022310555	42530	Ag_0_bud
shape3	0.778102	0.000192992	4031.78	0	0.999999999902222
scale3	5.83298	0.00117227	4975.81	0
mu4	0.11729	0.000225775	519.499	0	0.999999999957484	0.99975031105784	-684520.65000959	42130	Ak_1
shape4	0.789991	0.000166346	4749.09	0	0.999999999957482
scale4	5.62876	0.000982031	5731.76	0
mu5	0.125074	0.000264454	472.951	0	0.999999999895743	0.999521810434281	-640043.947040379	42478	Altai_5
shape5	0.754429	0.000198784	3795.22	0	0.999999999895738
scale5	5.78519	0.00131026	4415.31	0
mu6	0.155158	0.000420482	369.001	0	0.99999999978294	0.999334447723438	-614052.97130619	42341	Amel_1
shape6	0.806141	0.000246008	3276.89	0	0.99999999978293
scale6	5.43297	0.00131029	4146.4	0
mu7	0.133155	0.000270478	492.294	0	0.999999999905609	0.999563813202355	-654734.144698483	42583	An_1
shape7	0.792126	0.000195412	4053.63	0	0.999999999905605
scale7	5.59639	0.00115017	4865.68	0
mu8	0.120241	0.000256399	468.962	0	0.999999999945689	0.99972343165572	-672195.292384624	42217	Anholt_1
shape8	0.778378	0.000191057	4074.06	0	0.999999999945686
scale8	5.61773	0.00120898	4646.65	0
mu9	0.0490504	0.000710999	68.988	0	0.999999999909822	0.999384231401786	-626901.018549925	41675	Ann_1
shape9	0.784961	0.000197795	3968.55	0	0.999999999909817
scale9	9.9049	0.00175375	5647.83	0
mu10	0.11743	0.000257145	456.669	0	0.999999999900328	0.999561899577635	-650488.962812119	42611	Anz_0
shape10	0.764322	0.000193722	3945.46	0	0.999999999900323
scale10	5.35584	0.00113413	4722.41	0
mu11	0.121333	0.000255102	475.624	0	0.999999999929025	0.999650002998654	-658039.767579859	42256	Appt_1
shape11	0.767213	0.000187578	4090.11	0	0.999999999929022
scale11	5.5544	0.00118066	4704.49	0
mu12	0.102757	0.000166222	618.193	0	0.999999999981863	0.999827430317595	-718166.90423002	42175	Ba_1
shape12	0.776389	0.000116137	6685.1	0	0.999999999981862
scale12	6.02736	0.000972107	6200.3	0
mu13	0.111433	0.000224618	496.101	0	0.999999999953228	0.999724377123874	-677510.779648152	42362	Baa_1
shape13	0.766328	0.000170247	4501.27	0	0.999999999953226
scale13	5.78198	0.00114976	5028.84	0
mu14	0.110994	0.000246376	450.505	0	0.99999999993711	0.999701601979399	-669987.442526498	42199	Benk_1
shape14	0.793298	0.000186425	4255.32	0	0.999999999937107
scale14	5.31578	0.00103244	5148.77	0
mu15	0.0412311	0.000679845	60.6479	0	0.999999999905418	0.999374083527122	-630936.561854627	41951	Bik_1
shape15	0.795975	0.000215179	3699.13	0	0.999999999905414
scale15	8.59673	0.00150724	5703.61	0
mu16	0.121375	0.000259823	467.145	0	0.999999999917243	0.999587485200969	-661183.174145646	42635	Bl_1
shape16	0.78678	0.000183781	4281.06	0	0.99999999991724
scale16	5.61413	0.00107612	5217.03	0
mu17	0.135489	0.000325249	416.57	0	0.999999999868777	0.999496667873658	-634909.453667994	42458	Bla_1
shape17	0.785292	0.000225601	3480.88	0	0.99999999986877
scale17	5.54689	0.00128631	4312.23	0
mu18	0.125372	0.000196631	637.6	0	0.999999999975561	0.999794611478445	-703527.334161179	42363	Boot_1
shape18	0.780684	0.000144041	5419.86	0	0.999999999975559
scale18	6.44887	0.00125188	5151.37	0
mu19	0.0469023	0.000830785	56.4554	0	0.999999999968418	0.99968002985925	-700265.770751683	42833	Bor_4
shape19	0.873101	0.000175389	4978.09	0	0.999999999968417
scale19	10.1375	0.00143475	7065.72	0
mu20	0.0886564	0.000325745	272.165	0	0.999999999979727	0.999762163148976	-725388.65037523	42781	Bor_4_bud
shape20	0.808115	0.000118186	6837.68	0	0.999999999979726
scale20	7.67811	0.000799902	9598.82	0
mu21	0.144633	0.00030532	473.71	0	0.999999999814437	0.999287569897532	-618710.672362521	42573	Br_0_bud
shape21	0.756887	0.000209994	3604.33	0	0.999999999814429
scale21	5.62215	0.00129359	4346.16	0
mu22	0.112935	0.000245797	459.463	0	0.999999999967455	0.999757490434489	-699253.343059557	42597	Bs_1
shape22	0.803237	0.000158973	5052.67	0	0.999999999967453
scale22	6.2892	0.00106448	5908.22	0
mu23	0.126824	0.00031456	403.178	0	0.999999999803752	0.999376886167608	-628090.051924928	42720	Bsch_0
shape23	0.800683	0.000228761	3500.08	0	0.999999999803742
scale23	4.88742	0.00109324	4470.57	0
mu24	0.16428	0.000667686	246.045	0	0.999999999683804	0.999219080316898	-608631.8354392	42800	Bu_0
shape24	0.892847	0.00032086	2782.67	0	0.999999999683789
scale24	5.56997	0.0014192	3924.72	0
mu25	0.119518	0.000240066	497.854	0	0.999999999919306	0.999609781722895	-662425.623451935	42537	Ca_0
shape25	0.779257	0.00018258	4268.04	0	0.999999999919302
scale25	5.38683	0.00106477	5059.13	0
mu26	0.152526	0.000397198	384.005	0	0.999999999642364	0.999100960100473	-597761.747800338	42634	Cal_0
shape26	0.795835	0.00026557	2996.71	0	0.999999999642347
scale26	5.16162	0.00134931	3825.38	0
mu27	0.125371	0.00023842	525.841	0	0.999999999931112	0.999649078172106	-661236.927656023	42303	Chat_1
shape27	0.774206	0.000184833	4188.68	0	0.999999999931109
scale27	5.43164	0.00109372	4966.2	0
mu28	0.155311	0.000381041	407.595	0	0.999999999808257	0.999294745904819	-616278.487274878	42495	Chi_0
shape28	0.783414	0.000221653	3534.42	0	0.999999999808248
scale28	5.98194	0.00137018	4365.82	0
mu29	0.124347	0.000162251	766.389	0	0.999999999988001	0.999822808352453	-722279.369237949	42037	Cnt_1
shape29	0.758291	0.000105083	7216.11	0	0.999999999988001
scale29	7.03861	0.00092173	7636.3	0
mu30	0.147965	0.00031876	464.189	0	0.999999999776769	0.999284934592651	-614331.376597231	42616	Co_1_bud
shape30	0.755852	0.000228333	3310.31	0	0.999999999776759
scale30	5.29166	0.00132665	3988.73	0
mu31	0.147625	0.000304452	484.887	0	0.999999999897616	0.999537140575651	-638948.21231856	42183	Com_1
shape31	0.766991	0.000207202	3701.66	0	0.999999999897611
scale31	5.73651	0.00127371	4503.76	0
mu32	0.0855102	0.000182194	469.336	0	0.999999999987445	0.999778882985081	-724212.514309101	42338	Cvi_0
shape32	0.751854	9.86642e-05	7620.33	0	0.999999999987445
scale32	7.45551	0.000777832	9584.98	0
mu33	0.136161	0.00026394	515.881	0	0.999999999915859	0.99955611211249	-654474.288653034	42549	Da_1_12
shape33	0.769132	0.00018051	4260.89	0	0.999999999915855
scale33	5.95384	0.0011499	5177.71	0
mu34	0.115493	0.000238765	483.71	0	0.999999999939662	0.999704590880867	-667777.692348631	42166	Db_1
shape34	0.779166	0.000191092	4077.44	0	0.999999999939659
scale34	5.36532	0.00110185	4869.38	0
mu35	0.116917	0.000210501	555.424	0	0.99999999997785	0.999794201164908	-696026.644400655	41993	Di_G
shape35	0.75782	0.000141755	5345.98	0	0.999999999977849
scale35	6.62976	0.00121915	5438.03	0
mu36	0.162592	0.000404069	402.387	0	0.999999999680946	0.999093364796659	-594900.489365451	42659	Dja_1
shape36	0.770163	0.000262881	2929.71	0	0.999999999680931
scale36	5.39548	0.0014986	3600.35	0
mu37	0.166106	0.000223859	742.011	0	0.999999999963131	0.999672418698336	-665866.580820922	41846	Ei_2
shape37	0.740045	0.000151213	4894.05	0	0.99999999996313
scale37	6.90357	0.00122998	5612.74	0
mu38	0.135001	0.00032422	416.387	0	0.999999999748014	0.999260587637354	-611856.392581116	42603	El_0
shape38	0.773203	0.000235478	3283.55	0	0.999999999748002
scale38	5.0453	0.00125484	4020.69	0
mu39	0.12318	0.000202681	607.753	0	0.999999999960834	0.999723073528254	-681412.321293093	42340	Ema_1
shape39	0.754154	0.000155677	4844.34	0	0.999999999960832
scale39	5.8471	0.00106407	5495.06	0
mu40	0.147615	0.000296211	498.344	0	0.999999999788299	0.999232197559384	-613663.712414839	42612	Ema_1_bud
shape40	0.748109	0.000209518	3570.62	0	0.999999999788289
scale40	5.46002	0.00129092	4229.55	0
mu41	0.153284	0.000334993	457.573	0	0.999999999788918	0.999363752973127	-617824.697674101	42398	En_D
shape41	0.78037	0.000236513	3299.49	0	0.999999999788908
scale41	5.14289	0.00125845	4086.67	0
mu42	0.154664	0.000362877	426.216	0	0.999999999811493	0.999304441568018	-616606.085355608	42664	Es_0
shape42	0.774924	0.000234923	3298.62	0	0.999999999811484
scale42	5.74152	0.00141002	4071.94	0
mu43	0.150191	0.000345885	434.222	0	0.999999999715334	0.999171506505043	-605403.486381062	42718	Est
shape43	0.774439	0.000240821	3215.82	0	0.999999999715321
scale43	5.23863	0.00132687	3948.1	0
mu44	0.115717	0.000187078	618.546	0	0.999999999975187	0.999778005238662	-703793.500373935	42551	Et_0
shape44	0.766502	0.000137548	5572.6	0	0.999999999975186
scale44	6.4085	0.00117795	5440.4	0
mu45	0.120778	0.000251615	480.011	0	0.999999999900944	0.999563794622607	-652281.105622542	42568	Fi_0
shape45	0.777577	0.000194756	3992.58	0	0.999999999900939
scale45	5.4335	0.00115346	4710.61	0
mu46	0.142863	0.000354439	403.067	0	0.999999999869263	0.999453741553381	-634439.682077659	42662	Fr_2
shape46	0.784595	0.000220938	3551.2	0	0.999999999869257
scale46	5.97542	0.00136056	4391.88	0
mu47	0.138493	0.000350931	394.644	0	0.999999999856256	0.99941482340893	-630262.309510144	42668	Fr_2_bud
shape47	0.777986	0.000217339	3579.6	0	0.999999999856249
scale47	5.91213	0.00135526	4362.36	0
mu48	0.133567	0.000278874	478.953	0	0.99999999991647	0.999610598862443	-652989.157198965	42533	Ga_0
shape48	0.759601	0.000201964	3761.07	0	0.999999999916466
scale48	5.72667	0.00133561	4287.67	0
mu49	0.132257	0.000275367	480.295	0	0.999999999883937	0.999498847167152	-646914.203241285	42595	Gel_1
shape49	0.782807	0.000191009	4098.27	0	0.999999999883932
scale49	5.56809	0.00109229	5097.63	0
mu50	0.153736	0.000356051	431.779	0	0.999999999825741	0.999293069223725	-619185.413340957	42631	Gie_0
shape50	0.770139	0.000214818	3585.08	0	0.999999999825733
scale50	6.13353	0.00140248	4373.34	0
mu51	-0.00891964	0.000673258	-13.2485	5.52049e-40	0.999999999831203	0.999492187429052	-658955.970418109	42828	Gifu_2
shape51	0.889487	0.000224257	3966.37	0	0.999999999831195
scale51	6.97022	0.00123256	5655.09	0
mu52	0.109574	0.000185658	590.192	0	0.999999999957188	0.99973902897362	-685975.730018713	42408	Got_7
shape52	0.768392	0.000155765	4933.04	0	0.999999999957186
scale52	5.46279	0.00113976	4792.94	0
mu53	0.123328	0.000176864	697.306	0	0.999999999966742	0.999777258055825	-693657.66932403	42309	Gr_1
shape53	0.758252	0.000149734	5064.01	0	0.999999999966741
scale53	5.93202	0.00136074	4359.41	0
mu54	0.118826	0.00025023	474.869	0	0.999999999903688	0.999581594022923	-655751.506524641	42533	Gre_0
shape54	0.781064	0.0001891	4130.44	0	0.999999999903684
scale54	5.27667	0.00103471	5099.64	0
mu55	0.0968457	0.000155791	621.637	0	0.999999999987688	0.999867851339845	-742393.631634272	42381	Gu_0
shape55	0.788951	0.00011243	7017.26	0	0.999999999987688
scale55	6.097	0.000917222	6647.24	0
mu56	0.147974	0.000326166	453.676	0	0.999999999770781	0.999265320809136	-608055.442569193	42552	Gy_0
shape56	0.755232	0.000241912	3121.93	0	0.99999999977077
scale56	5.34357	0.00143338	3727.95	0
mu57	0.157354	0.000284297	553.484	0	0.999999999812427	0.99924763664931	-617204.564365152	42695	HR_5_bud
shape57	0.746612	0.000202972	3678.41	0	0.999999999812419
scale57	5.9178	0.0014646	4040.57	0
mu58	0.137687	0.000311432	442.11	0	0.999999999832342	0.999423960574215	-631656.286772442	42650	Ha_0
shape58	0.788411	0.000225272	3499.82	0	0.999999999832334
scale58	5.09089	0.00115335	4414	0
mu59	0.127326	0.000306843	414.954	0	0.999999999865147	0.999499927961908	-637303.924302894	42495	Hey_1
shape59	0.779978	0.000214518	3635.95	0	0.99999999986514
scale59	5.24874	0.00117848	4453.82	0
mu60	0.116239	0.000263815	440.609	0	0.999999999845512	0.999440801148844	-629658.90252427	42609	Hs_0
shape60	0.75386	0.000211341	3567.03	0	0.999999999845505
scale60	5.14205	0.0012526	4105.1	0
mu61	0.148339	0.000330093	449.385	0	0.999999999726477	0.999207165342241	-606912.197012327	42643	In_0
shape61	0.764517	0.000237361	3220.91	0	0.999999999726464
scale61	5.17101	0.00132214	3911.1	0
mu62	0.123327	0.000215688	571.782	0	0.999999999910481	0.99959043524768	-649354.69444723	42366	Is_0
shape62	0.759027	0.000192443	3944.16	0	0.999999999910477
scale62	5.38023	0.00116946	4600.62	0
mu63	0.136324	0.000303542	449.111	0	0.999999999808798	0.999332184200246	-622388.045185252	42647	Is_0_bud
shape63	0.769107	0.00021858	3518.65	0	0.999999999808789
scale63	5.3004	0.00122773	4317.22	0
mu64	0.134822	0.0002383	565.768	0	0.999999999928359	0.999603259738597	-659352.255121134	42521	Je_0
shape64	0.757549	0.000174694	4336.43	0	0.999999999928356
scale64	5.92813	0.00123301	4807.86	0
mu65	0.139939	0.000290106	482.371	0	0.999999999844487	0.999442695993367	-631026.299815588	42513	Jm_0
shape65	0.780019	0.000220748	3533.53	0	0.999999999844479
scale65	5.20436	0.00118917	4376.47	0
mu66	0.128376	0.000198479	646.801	0	0.999999999961944	0.999738523859806	-686286.594758524	42560	Kas_1
shape66	0.760563	0.000158096	4810.76	0	0.999999999961942
scale66	6.24524	0.00146469	4263.86	0
mu67	0.120203	0.00027589	435.69	0	0.999999999894892	0.999606090665024	-647046.615817353	42268	Kelsterbach_4
shape67	0.783528	0.000217455	3603.18	0	0.999999999894887
scale67	5.11275	0.00119175	4290.12	0
mu68	0.141069	0.000340365	414.463	0	0.999999999882976	0.999505964975826	-641081.48955453	42577	Kil_0
shape68	0.788263	0.000213371	3694.32	0	0.99999999988297
scale68	5.82926	0.00127714	4564.3	0
mu69	0.110733	0.0001979	559.54	0	0.999999999960969	0.999706416288925	-681393.512414807	42337	Kin_0
shape69	0.75871	0.000148072	5123.94	0	0.999999999960967
scale69	6.14357	0.00104836	5860.19	0
mu70	0.135214	0.000261234	517.598	0	0.999999999905752	0.999522504450769	-651018.837994583	42636	Kin_0_bud
shape70	0.765294	0.000181419	4218.38	0	0.999999999905748
scale70	5.72937	0.00111594	5134.11	0
mu71	0.132875	0.000285132	466.012	0	0.999999999871596	0.999529503459675	-633862.811080439	42384	Kl_5
shape71	0.76448	0.000228363	3347.65	0	0.99999999987159
scale71	5.21635	0.00133977	3893.47	0
mu72	0.138913	0.00026217	529.858	0	0.999999999855083	0.999439493547213	-628525.214924652	42413	Knox_18
shape72	0.74654	0.000206485	3615.47	0	0.999999999855076
scale72	5.41039	0.00126909	4263.2	0
mu73	0.138835	0.000269385	515.377	0	0.999999999873604	0.999477858306581	-631375.803737208	42405	Kondara
shape73	0.744362	0.00020829	3573.67	0	0.999999999873598
scale73	5.58081	0.00134041	4163.52	0
mu74	0.111869	0.000228482	489.617	0	0.999999999910548	0.999632902745638	-659899.231549648	42374	Kro_0
shape74	0.78804	0.000187064	4212.68	0	0.999999999910544
scale74	4.85393	0.000969985	5004.13	0
mu75	0.148775	0.000318161	467.609	0	0.999999999748006	0.999262536488382	-607934.058833536	42508	Krot_0
shape75	0.761758	0.000242807	3137.3	0	0.999999999747994
scale75	5.17527	0.00135854	3809.44	0
mu76	0.140678	0.000311409	451.747	0	0.999999999809854	0.999360196586128	-619427.167511931	42529	Kyoto
shape76	0.767316	0.000228278	3361.32	0	0.999999999809845
scale76	5.26026	0.00128658	4088.56	0
mu77	0.12165	0.000232817	522.515	0	0.999999999925756	0.999600028719883	-655674.769106707	42451	Kz_9
shape77	0.753712	0.000177111	4255.58	0	0.999999999925753
scale77	5.78918	0.00117081	4944.59	0
mu78	0.152763	0.000285623	534.841	0	0.9999999997909	0.999269788672556	-615272.273107477	42628	La_0
shape78	0.751257	0.000218091	3444.69	0	0.99999999979089
scale78	5.32045	0.00130399	4080.14	0
mu79	0.0996091	0.000191542	520.038	0	0.999999999918129	0.999726297110706	-687435.307790805	42517	Lan_0
shape79	0.828374	0.000181477	4564.63	0	0.999999999918125
scale79	4.19978	0.000747349	5619.57	0
mu80	0.126486	0.000197393	640.786	0	0.99999999995694	0.999677699900041	-673572.742849439	42427	Ler_1
shape80	0.736202	0.000143845	5118.01	0	0.999999999956938
scale80	6.26229	0.00121061	5172.83	0
mu81	0.129268	0.000281961	458.461	0	0.999999999881207	0.99947554844376	-642085.471724289	42609	Li_2_1_bud
shape81	0.771762	0.000192597	4007.13	0	0.999999999881202
scale81	5.63244	0.00114937	4900.44	0
mu82	0.132498	0.000282558	468.922	0	0.999999999881693	0.999532160540802	-632957.868165897	42273	Litva
shape82	0.758211	0.000222396	3409.28	0	0.999999999881687
scale82	5.59664	0.00143108	3910.77	0
mu83	0.159096	0.000329553	482.763	0	0.999999999637602	0.999055912933366	-594495.411031163	42616	Litva_bud
shape83	0.749439	0.000243992	3071.58	0	0.999999999637585
scale83	5.00663	0.00136004	3681.24	0
mu84	0.147889	0.000309305	478.134	0	0.999999999762761	0.99920989916559	-610962.182960282	42623	Lm_2
shape84	0.757252	0.000221906	3412.5	0	0.99999999976275
scale84	5.29424	0.00130457	4058.22	0
mu85	0.131123	0.000286525	457.63	0	0.999999999869233	0.99950451046398	-634905.252385984	42324	Lp2_2
shape85	0.774954	0.000214377	3614.92	0	0.999999999869227
scale85	5.06675	0.00115857	4373.28	0
mu86	0.121404	0.000200023	606.947	0	0.999999999984369	0.999831108186658	-725234.482705063	42568	Mc_0
shape86	0.782269	0.00012313	6353.19	0	0.999999999984368
scale86	6.81019	0.000999975	6810.36	0
mu87	0.14304	0.000364183	392.769	0	0.999999999834475	0.99941539701275	-632624.631986908	42687	Mh_0_bud
shape87	0.803836	0.000225429	3565.8	0	0.999999999834467
scale87	5.3312	0.00116349	4582.07	0
mu88	0.150142	0.000381298	393.767	0	0.99999999981203	0.999330596396184	-627701.997386126	42755	Ms_0_bud
shape88	0.813833	0.000223641	3639.01	0	0.999999999812021
scale88	5.64698	0.00120433	4688.89	0
mu89	0.138121	0.000300747	459.26	0	0.999999999792451	0.999323813324887	-620052.990013414	42608	Mz_0_bud
shape89	0.768204	0.000223641	3434.99	0	0.999999999792442
scale89	5.10328	0.00121425	4202.83	0
mu90	0.131778	0.000267346	492.91	0	0.999999999823924	0.999379976620745	-624876.525669517	42553	Nc_1_bud
shape90	0.760483	0.000212019	3586.86	0	0.999999999823915
scale90	5.14993	0.00119834	4297.54	0
mu91	0.142172	0.000320448	443.667	0	0.999999999829239	0.999363660423793	-622290.655410892	42565	Neo_6_bud
shape91	0.760034	0.000216957	3503.16	0	0.999999999829231
scale91	5.6366	0.0013482	4180.83	0
mu92	0.136562	0.00029315	465.844	0	0.999999999926185	0.999590894037996	-661556.075324766	42639	Nok_3_bud
shape92	0.788046	0.00018412	4280.06	0	0.999999999926181
scale92	6.19212	0.00115808	5346.9	0
mu93	0.187712	0.00054743	342.897	0	0.999999999334942	0.998686740975821	-569364.486137844	42758	Np_0_bud
shape93	0.814977	0.000322221	2529.25	0	0.99999999933491
scale93	5.2498	0.00158736	3307.25	0
mu94	0.140007	0.000434584	322.163	0	0.999999999779454	0.999360266738438	-628798.267640706	42777	Nw_0_bud
shape94	0.848904	0.000251088	3380.9	0	0.999999999779444
scale94	5.18974	0.0011234	4619.67	0
mu95	0.135053	0.000261164	517.121	0	0.999999999880064	0.999446975006714	-642468.250633083	42695	Ob_0_bud
shape95	0.769094	0.000184785	4162.11	0	0.999999999880059
scale95	5.62245	0.00112764	4986.04	0
mu96	0.146446	0.00037586	389.629	0	0.999999999719624	0.999184300482337	-608874.741777632	42684	Old_1_bud
shape96	0.78985	0.000239214	3301.85	0	0.999999999719611
scale96	5.43681	0.00130803	4156.49	0
mu97	0.144534	0.000215577	670.45	0	0.999999999937487	0.999576724892395	-662186.971846114	42660	Ove_0_bud
shape97	0.737878	0.000150512	4902.45	0	0.999999999937484
scale97	6.70272	0.00133147	5034.08	0
mu98	0.145501	0.00023662	614.916	0	0.999999999914956	0.999582772477535	-647263.948007492	42242	Per_1
shape98	0.755842	0.000182691	4137.28	0	0.999999999914952
scale98	5.88485	0.00122789	4792.63	0
mu99	0.149393	0.00021204	704.548	0	0.99999999995431	0.999676926611183	-668395.092884262	42098	Pi_0
shape99	0.749495	0.000155042	4834.13	0	0.999999999954307
scale99	6.50734	0.00118614	5486.13	0
mu100	0.145521	0.000351747	413.71	0	0.999999999808085	0.999280060309587	-619669.603616431	42691	Pla_0_bud
shape100	0.78542	0.000224256	3502.34	0	0.999999999808076
scale100	5.74629	0.00131877	4357.3	0
mu101	0.100237	0.000160978	622.68	0	0.999999999983305	0.999821439970996	-734614.013021145	42558	Pna_17_bud
shape101	0.802238	0.000113562	7064.31	0	0.999999999983304
scale101	6.0334	0.000711269	8482.58	0
mu102	0.16577	0.000350345	473.163	0	0.999999999727705	0.999128758339939	-607213.255291951	42692	Pog_0_bud
shape102	0.768239	0.000222118	3458.69	0	0.999999999727692
scale102	5.64192	0.00134047	4208.93	0
mu103	0.128873	0.000187811	686.181	0	0.999999999961292	0.999699046505263	-682425.875599014	42597	Pro_0_bud
shape103	0.75002	0.000145369	5159.41	0	0.99999999996129
scale103	6.61391	0.00135727	4872.95	0
mu104	0.119474	0.000252144	473.832	0	0.999999999858605	0.999567114864391	-648137.549691151	42237	Pt_0
shape104	0.794556	0.000201471	3943.77	0	0.999999999858598
scale104	4.74762	0.000955555	4968.45	0
mu105	0.1422	0.00034161	416.263	0	0.999999999765398	0.999277905646706	-611583.205679194	42579	Pu2_23
shape105	0.779899	0.000242564	3215.23	0	0.999999999765387
scale105	5.17168	0.00129878	3981.95	0
mu106	0.160983	0.000292835	549.739	0	0.999999999778993	0.999157230950582	-607323.816658406	42628	Pu2_23_bud
shape106	0.735031	0.000206299	3562.93	0	0.999999999778983
scale106	5.84889	0.00142805	4095.73	0
mu107	0.124604	0.000242236	514.39	0	0.99999999996025	0.999727714668908	-685719.142452778	42427	Pu2_7_bud
shape107	0.783825	0.000164621	4761.41	0	0.999999999960248
scale107	6.26932	0.00108699	5767.6	0
mu108	0.118808	0.00029945	396.753	0	0.99999999990211	0.999586361556124	-654671.644624926	42566	Ra_0
shape108	0.800981	0.000202505	3955.37	0	0.999999999902105
scale108	5.34317	0.00107512	4969.86	0
mu109	0.117507	0.000163781	717.464	0	0.999999999985853	0.99983603968094	-719147.635986073	42166	Ragl_1
shape109	0.75886	0.000113971	6658.34	0	0.999999999985853
scale109	6.82598	0.00111312	6132.28	0
mu110	0.222652	0.000379686	586.411	0	0.99999999962974	0.998884815695471	-585569.298859478	42703	Ragl_1_bud
shape110	0.738761	0.000236204	3127.64	0	0.999999999629722
scale110	6.19762	0.00170881	3626.86	0
mu111	0.0741721	0.000631317	117.488	0	0.999999999916543	0.999421333762022	-634130.230366028	41789	Rd_0
shape111	0.773016	0.000185841	4159.56	0	0.999999999916539
scale111	9.48323	0.00163344	5805.67	0
mu112	0.155404	0.000330472	470.247	0	0.999999999831252	0.99934069995623	-626586.833989274	42660	Rennes_1_bud
shape112	0.772798	0.000211067	3661.38	0	0.999999999831244
scale112	5.70525	0.00127342	4480.25	0
mu113	0.148812	0.000288134	516.467	0	0.999999999803576	0.999284357745439	-617942.38714027	42610	Rld_1_bud
shape113	0.752534	0.000209999	3583.51	0	0.999999999803567
scale113	5.48971	0.00129154	4250.53	0
mu114	0.185238	0.000413582	447.887	0	0.999999999693183	0.99902338580193	-598080.344431736	42751	Rmx_A02_bud
shape114	0.777513	0.000237726	3270.62	0	0.999999999693169
scale114	6.10215	0.00151938	4016.21	0
mu115	0.173296	0.000338327	512.215	0	0.999999999755906	0.999200023661688	-612017.26836451	42721	Rome_1_bud
shape115	0.777078	0.000227705	3412.65	0	0.999999999755894
scale115	5.56441	0.00135322	4111.97	0
mu116	0.158217	0.000397407	398.123	0	0.999999999796696	0.999270540559402	-615856.284534214	42614	RRS_7
shape116	0.795399	0.000236615	3361.58	0	0.999999999796686
scale116	5.80637	0.00135961	4270.63	0
mu117	0.173831	0.000349002	498.08	0	0.999999999639079	0.99893859567331	-585756.923968829	42615	Rubezhnoe_1_bud
shape117	0.7412	0.000246522	3006.63	0	0.999999999639062
scale117	5.58659	0.00158097	3533.64	0
mu118	0.154013	0.000345725	445.479	0	0.999999999820988	0.999334262110415	-621490.719387051	42629	Se_0_bud
shape118	0.778501	0.000223531	3482.74	0	0.99999999982098
scale118	5.67422	0.001321	4295.4	0
mu119	0.119856	0.000267181	448.594	0	0.999999999892878	0.999534004422208	-648763.640130449	42635	Seattle_0
shape119	0.77843	0.000199314	3905.55	0	0.999999999892873
scale119	5.41084	0.0011129	4861.92	0
mu120	0.164097	0.000371529	441.679	0	0.999999999843854	0.999338264253432	-625831.505768555	42710	Sei_0_bud
shape120	0.777537	0.000214411	3626.38	0	0.999999999843846
scale120	6.21612	0.00138122	4500.45	0
mu121	0.198115	0.00076264	259.776	0	0.999999999427904	0.998919858617365	-586690.089483655	42849	Sg_1
shape121	0.907182	0.000362348	2503.62	0	0.999999999427877
scale121	5.5629	0.00155255	3583.08	0
mu122	0.111577	0.000226031	493.636	0	0.999999999961205	0.999747224416688	-682795.857025155	42216	Si_0
shape122	0.777881	0.000163624	4754.07	0	0.999999999961203
scale122	6.00209	0.00110896	5412.35	0
mu123	0.184005	0.000309797	593.952	0	0.999999999821925	0.999218650360599	-615287.119694876	42701	Sorbo_bud
shape123	0.733899	0.000199218	3683.9	0	0.999999999821917
scale123	6.33554	0.00157167	4031.09	0
mu124	0.206933	0.000350116	591.041	0	0.999999999614136	0.998843883017852	-585120.725917765	42758	Sp_0_bud
shape124	0.757387	0.000236623	3200.81	0	0.999999999614118
scale124	5.98915	0.00161573	3706.78	0
mu125	0.192665	0.000349915	550.606	0	0.999999999661958	0.998944998118983	-591160.780443127	42711	Sq_8_bud
shape125	0.745795	0.000228247	3267.49	0	0.999999999661942
scale125	5.88614	0.00154898	3800	0
mu126	0.132272	0.000260766	507.241	0	0.999999999905156	0.999567216758829	-646833.336698362	42378	Stw_0
shape126	0.768185	0.000199807	3844.63	0	0.999999999905152
scale126	5.58335	0.00119539	4670.73	0
mu127	0.127016	0.000206817	614.146	0	0.999999999943845	0.999673393701834	-666918.7392243	42191	Su_0
shape127	0.754654	0.000160243	4709.45	0	0.999999999943842
scale127	5.88706	0.00115969	5076.43	0
mu128	0.19639	0.000488569	401.971	0	0.999999999429465	0.998721627198281	-571181.999311907	42754	Sus_1_bud
shape128	0.785905	0.000301282	2608.53	0	0.999999999429438
scale128	5.46316	0.00165779	3295.45	0
mu129	0.193774	0.00049141	394.322	0	0.999999999616709	0.998972888339829	-593822.849972916	42776	Ta_0_bud
shape129	0.80643	0.000261671	3081.84	0	0.999999999616691
scale129	5.87536	0.00147933	3971.64	0
mu130	0.126927	0.000193363	656.415	0	0.999999999980504	0.999767988462035	-708503.695122776	42543	Tamm_2_bud
shape130	0.758726	0.00012644	6000.69	0	0.999999999980503
scale130	7.09296	0.00100933	7027.42	0
mu131	0.203773	0.00054679	372.671	0	0.999999999573185	0.998908746602419	-587546.586572918	42810	Tol_0_bud
shape131	0.814404	0.000279608	2912.67	0	0.999999999573165
scale131	6.07561	0.00160563	3783.95	0
mu132	0.169471	0.000361153	469.249	0	0.999999999819745	0.999265818558942	-622489.744663294	42757	Tscha_1_bud
shape132	0.78158	0.000208078	3756.18	0	0.999999999819737
scale132	6.17872	0.00133167	4639.84	0
mu133	0.180181	0.000342924	525.426	0	0.999999999609327	0.99890845663632	-589240.163601653	42752	Tu_0_bud
shape133	0.749307	0.000233051	3215.21	0	0.999999999609309
scale133	5.79291	0.00154984	3737.75	0
mu134	0.192834	0.000484063	398.364	0	0.999999999529304	0.998849626626022	-581927.113165261	42751	Ty_0_bud
shape134	0.795867	0.000284345	2798.95	0	0.999999999529282
scale134	5.59802	0.00156587	3575.02	0
mu135	0.121996	0.000321336	379.652	0	0.999999999860355	0.999525825516566	-641153.682877957	42658	Uk_1
shape135	0.800772	0.000227659	3517.41	0	0.999999999860348
scale135	5.08735	0.00115863	4390.84	0
mu136	0.173466	0.00042885	404.49	0	0.99999999973435	0.999160628050078	-609235.584241367	42706	Uk_1_bud
shape136	0.802139	0.000240755	3331.77	0	0.999999999734338
scale136	5.81179	0.00135803	4279.58	0
mu137	0.204661	0.00035466	577.063	0	0.999999999629802	0.998887084023909	-584336.873470942	42668	Uod_1_bud
shape137	0.728855	0.000229551	3175.14	0	0.999999999629785
scale137	6.3622	0.00180107	3532.45	0
mu138	0.182589	0.000532132	343.127	0	0.999999999810144	0.999316691999645	-626618.103646777	42814	Utrecht_bud
shape138	0.852938	0.000247135	3451.3	0	0.999999999810135
scale138	6.35552	0.00135777	4680.86	0
mu139	0.214521	0.000488105	439.499	0	0.999999999387941	0.998637905217584	-570380.355106213	42787	Van_0_bud
shape139	0.787272	0.000290384	2711.14	0	0.999999999387913
scale139	5.5533	0.0016285	3410.06	0
mu140	0.120877	0.000216729	557.732	0	0.999999999964695	0.999738455213787	-686522.276582588	42238	Vind_1
shape140	0.771475	0.000153564	5023.78	0	0.999999999964694
scale140	6.05078	0.00102439	5906.71	0
mu141	0.140474	0.000358574	391.757	0	0.999999999701408	0.999166618112397	-600461.115393021	42623	Wa_1
shape141	0.767964	0.000254149	3021.71	0	0.999999999701394
scale141	5.0165	0.00136427	3677.05	0
mu142	0.202672	0.000468539	432.561	0	0.999999999477608	0.998762503115386	-574983.510858296	42711	Westkar_4_bud
shape142	0.774916	0.000283341	2734.93	0	0.999999999477583
scale142	5.53315	0.00162775	3399.26	0
mu143	0.207076	0.000532462	388.903	0	0.999999999492041	0.9988144418745	-580934.538927104	42777	Wl_0_bud
shape143	0.807001	0.000292143	2762.35	0	0.999999999492018
scale143	5.64633	0.00157439	3586.35	0
mu144	0.150623	0.000339534	443.617	0	0.999999999811963	0.999304643074776	-624745.045191934	42685	Ws_2_bud
shape144	0.794911	0.000213126	3729.77	0	0.999999999811954
scale144	5.70399	0.00122635	4651.18	0
mu145	0.136283	0.000310796	438.496	0	0.999999999813979	0.999374087425882	-626600.197906064	42648	Wt_5
shape145	0.781075	0.000219351	3560.84	0	0.99999999981397
scale145	5.1614	0.00118478	4356.43	0
mu146	0.125895	0.000284475	442.551	0	0.99999999993433	0.999677921108477	-665403.337939619	42200	Yo_0
shape146	0.796845	0.000193029	4128.1	0	0.999999999934327
scale146	5.49197	0.00108776	5048.87	0
mu147	0.135549	0.000283726	477.745	0	0.999999999865183	0.999485764457261	-638022.326424528	42627	Zdr_1
shape147	0.776664	0.000214338	3623.55	0	0.999999999865177
scale147	5.16484	0.00115715	4463.41	0
mu148	0.172445	0.000343927	501.402	0	0.999999999737328	0.999148988481628	-606661.341741195	42701	Zdr_1_bud
shape148	0.763114	0.000229245	3328.82	0	0.999999999737316
scale148	5.50357	0.00135882	4050.26	0
mu149	0.15075	0.000277838	542.581	0	0.999999999952913	0.999688690474812	-681087.428450601	42658	Er_0
shape149	0.802645	0.000181	4434.49	0	0.999999999952911
scale149	6.65159	0.00138454	4804.2	0
mu150	0.143864	0.000287989	499.547	0	0.999999999856987	0.999388219615812	-632504.675820471	42661	Er_0_bud
shape150	0.75664	0.000195816	3864.03	0	0.99999999985698
scale150	5.74071	0.00123648	4642.8	0

## Sheet: 3000bp
					Non-linear fits for I[R] Arabidopsis Thaliana ecotypes
							Genomic region 3000bp
	The two methods of model validation were used:
	1) Data splitting-Randomly split the data, obtain a prediction equation on one half
	of the random split and then check its predictive power (cross-validate) on the other
	sample.
	2) An estimate of the average predictive power of the equation on many other samples
	from the same population, using a formula due to Stein
Reference	J. P. Stevens, Applied Multivariate Statistics for the Social Sciences. (Routledge Academic, Fifth Edit., 2009)
	Estimate	Std. Error	t value	Pr(>|t|))	Adj.R.Square	R.Cross.val	AIC	sample.size	Sample
mu	0.124998	0.000318459	392.51	0	0.99999999987575	0.999463572627854	-586031.237205316	39162	Aa_0
shape	0.782884	0.000214795	3644.8	0	0.999999999875744
scale	5.57865	0.0012584	4433.13	0
mu1	0.116901	0.000293416	398.414	0	0.999999999901523	0.999509473906005	-593249.710271837	39183	Abd_0
shape1	0.772032	0.000199118	3877.25	0	0.999999999901518
scale1	5.61461	0.00122202	4594.53	0
mu2	0.133228	0.000246585	540.293	0	0.999999999975283	0.999759843435011	-633998.222378764	38888	Ag_0
shape2	0.758828	0.000164061	4625.29	0	0.999999999975282
scale2	7.08526	0.00138167	5128.04	0
mu3	0.148477	0.000351886	421.947	0	0.999999999897051	0.999460693746112	-586917.580046062	39099	Ag_0_bud
shape3	0.781511	0.000210583	3711.18	0	0.999999999897045
scale3	6.22503	0.00134741	4619.99	0
mu4	0.110216	0.000266792	413.115	0	0.999999999964655	0.999774642194704	-632528.482124816	38834	Ak_1
shape4	0.797446	0.000198258	4022.27	0	0.999999999964653
scale4	6.06006	0.00127426	4755.74	0
mu5	0.132488	0.000306328	432.505	0	0.999999999909607	0.999519136880467	-588641.321037287	39078	Altai_5
shape5	0.757135	0.00021066	3594.1	0	0.999999999909602
scale5	6.20372	0.0014629	4240.69	0
mu6	0.155716	0.000498266	312.517	0	0.99999999978061	0.999257712917299	-558811.673558971	38958	Amel_1
shape6	0.8091	0.000263169	3074.45	0	0.999999999780599
scale6	5.77783	0.001463	3949.31	0
mu7	0.137098	0.000324356	422.678	0	0.99999999991747	0.999558314647838	-600705.025337857	39109	An_1
shape7	0.797736	0.000208514	3825.82	0	0.999999999917466
scale7	6.04405	0.00130472	4632.47	0
mu8	0.12657	0.000301543	419.741	0	0.999999999950035	0.999730417138168	-616831.894145949	38877	Anholt_1
shape8	0.780797	0.000212372	3676.56	0	0.999999999950032
scale8	6.00404	0.001485	4043.12	0
mu9	0.0376369	0.000727134	51.7606	0	0.999999999942837	0.999464423121929	-590845.364575204	38492	Ann_1
shape9	0.794976	0.000194026	4097.27	0	0.999999999942834
scale9	10.7137	0.00181615	5899.14	0
mu10	0.120706	0.000316391	381.509	0	0.99999999989616	0.999527927796953	-590414.557791132	39143	Anz_0
shape10	0.76974	0.000214636	3586.25	0	0.999999999896154
scale10	5.73302	0.00135515	4230.54	0
mu11	0.126327	0.000292106	432.47	0	0.999999999937732	0.999653903138377	-605026.721160293	38901	Appt_1
shape11	0.770658	0.000208394	3698.08	0	0.999999999937729
scale11	5.95829	0.00139433	4273.22	0
mu12	0.10727	0.000192467	557.345	0	0.999999999985629	0.999844603103136	-664804.541673243	38841	Ba_1
shape12	0.779539	0.000127624	6108.08	0	0.999999999985628
scale12	6.48443	0.00108829	5958.36	0
mu13	0.110416	0.000271182	407.167	0	0.999999999956508	0.999727444618539	-620383.402467768	38975	Baa_1
shape13	0.77327	0.000199312	3879.7	0	0.999999999956505
scale13	6.23397	0.00151966	4102.21	0
mu14	0.109961	0.000295089	372.638	0	0.999999999948982	0.999731858212141	-619594.728163526	38858	Benk_1
shape14	0.793936	0.000217196	3655.4	0	0.999999999948979
scale14	5.67907	0.00130027	4367.62	0
mu15	0.0124734	0.000766769	16.2675	2.64324e-59	0.999999999925592	0.999401992134714	-585154.979214986	38664	Bik_1
shape15	0.817291	0.00022764	3590.28	0	0.999999999925588
scale15	9.38229	0.00164723	5695.8	0
mu16	0.141052	0.000323942	435.423	0	0.999999999928188	0.999596537093669	-606920.19080642	39159	Bl_1
shape16	0.791198	0.000199811	3959.72	0	0.999999999928184
scale16	6.0361	0.00120008	5029.77	0
mu17	0.147292	0.000376126	391.602	0	0.999999999866559	0.999444811232507	-577534.565958486	39053	Bla_1
shape17	0.785515	0.000237146	3312.37	0	0.999999999866552
scale17	5.90997	0.00146997	4020.46	0
mu18	0.115003	0.000229457	501.199	0	0.999999999983571	0.99982135754828	-657345.912428149	38989	Boot_1
shape18	0.788683	0.000133527	5906.53	0	0.99999999998357
scale18	7.00357	0.0012415	5641.2	0
mu19	0.0165707	0.000839173	19.7465	2.2613e-86	0.999999999983285	0.99975809799929	-662102.677153276	39283	Bor_4
shape19	0.899372	0.000165591	5431.27	0	0.999999999983284
scale19	11.105	0.00144457	7687.4	0
mu20	0.0862086	0.000364814	236.308	0	0.999999999984122	0.999778185260108	-670024.224412931	39259	Bor_4_bud
shape20	0.817924	0.000122602	6671.36	0	0.999999999984121
scale20	8.32624	0.000892437	9329.78	0
mu21	0.164857	0.000355333	463.95	0	0.999999999813104	0.999233647967718	-562814.765583775	39154	Br_0_bud
shape21	0.75614	0.000226244	3342.14	0	0.999999999813095
scale21	5.97285	0.00148766	4014.94	0
mu22	0.12416	0.000290378	427.581	0	0.999999999968184	0.999737622403464	-638275.538412836	39160	Bs_1
shape22	0.80816	0.000166503	4853.72	0	0.999999999968182
scale22	6.7716	0.00117154	5780.06	0
mu23	0.136133	0.000380244	358.015	0	0.999999999803867	0.999359077474944	-571302.300293903	39227	Bsch_0
shape23	0.804307	0.000261535	3075.33	0	0.999999999803857
scale23	5.20298	0.00130115	3998.76	0
mu24	0.178531	0.000793108	225.103	0	0.999999999703221	0.999203675113574	-555163.305190842	39268	Bu_0
shape24	0.900178	0.000359013	2507.37	0	0.999999999703206
scale24	5.95648	0.00166232	3583.24	0
mu25	0.124338	0.000267765	464.356	0	0.999999999937053	0.999633358103899	-613086.320987772	39120	Ca_0
shape25	0.783888	0.000189712	4131.99	0	0.99999999993705
scale25	5.78121	0.00111828	5169.71	0
mu26	0.162531	0.000491824	330.466	0	0.999999999661586	0.999063526932928	-545548.030692846	39165	Cal_0
shape26	0.798368	0.000284847	2802.8	0	0.999999999661568
scale26	5.50703	0.00153401	3589.97	0
mu27	0.123948	0.000268968	460.828	0	0.99999999993585	0.999636738318821	-605894.427262293	38950	Chat_1
shape27	0.779199	0.000196308	3969.26	0	0.999999999935846
scale27	5.84889	0.00124593	4694.4	0
mu28	0.173	0.00043261	399.897	0	0.999999999807962	0.999210595274449	-560802.387316228	39063	Chi_0
shape28	0.786038	0.000233332	3368.75	0	0.999999999807952
scale28	6.40015	0.00153651	4165.4	0
mu29	0.117915	0.000201542	585.064	0	0.999999999992382	0.99985132751234	-677414.566916801	38741	Cnt_1
shape29	0.76767	0.000107952	7111.25	0	0.999999999992382
scale29	7.6307	0.000923399	8263.71	0
mu30	0.145817	0.000384881	378.863	0	0.999999999769711	0.999208898053187	-557849.086508003	39165	Co_1_bud
shape30	0.764425	0.000243308	3141.8	0	0.999999999769699
scale30	5.68514	0.0014988	3793.11	0
mu31	0.150865	0.000343097	439.716	0	0.999999999895923	0.999471688815326	-582554.750261116	38887	Com_1
shape31	0.7703	0.000210547	3658.57	0	0.999999999895917
scale31	6.11146	0.00138437	4414.62	0
mu32	0.0789229	0.000259934	303.626	0	0.99999999998862	0.999773061426718	-664951.617195265	38973	Cvi_0
shape32	0.763231	0.000109294	6983.31	0	0.999999999988619
scale32	8.08265	0.000889133	9090.49	0
mu33	0.140368	0.000321091	437.16	0	0.999999999923997	0.999556743989684	-600038.361493672	39114	Da_1_12
shape33	0.77689	0.000194128	4001.95	0	0.999999999923993
scale33	6.41212	0.00133035	4819.86	0
mu34	0.114142	0.000281298	405.768	0	0.999999999942435	0.999695458132979	-611569.94104365	38856	Db_1
shape34	0.782425	0.000205864	3800.69	0	0.999999999942432
scale34	5.73965	0.00130297	4405.06	0
mu35	0.118997	0.000274792	433.045	0	0.999999999980339	0.999801361289433	-640342.312232953	38694	Di_G
shape35	0.766897	0.000175794	4362.47	0	0.999999999980338
scale35	7.18545	0.00142359	5047.43	0
mu36	0.174561	0.000484724	360.124	0	0.999999999666346	0.999037589626937	-538853.805459406	39177	Dja_1
shape36	0.778966	0.000299908	2597.35	0	0.999999999666329
scale36	5.76628	0.0017948	3212.77	0
mu37	0.160141	0.000245624	651.977	0	0.999999999971137	0.999685724610099	-618155.422972331	38617	Ei_2
shape37	0.74359	0.000160195	4641.78	0	0.999999999971136
scale37	7.4469	0.00135079	5513.01	0
mu38	0.14045	0.000398728	352.245	0	0.999999999749092	0.999215557435511	-556706.756391971	39152	El_0
shape38	0.776774	0.000258771	3001.78	0	0.999999999749079
scale38	5.39308	0.00145885	3696.79	0
mu39	0.119097	0.000246437	483.275	0	0.999999999961509	0.999710035104547	-622217.907577266	38976	Ema_1
shape39	0.763858	0.000170499	4480.14	0	0.999999999961507
scale39	6.31513	0.001281	4929.84	0
mu40	0.16407	0.000339607	483.117	0	0.999999999766299	0.999128057637616	-553870.535729082	39141	Ema_1_bud
shape40	0.746944	0.000229217	3258.68	0	0.999999999766287
scale40	5.79392	0.00150328	3854.17	0
mu41	0.149788	0.000374152	400.339	0	0.999999999802143	0.99931149932367	-565737.78077995	39046	En_D
shape41	0.786126	0.000243438	3229.27	0	0.999999999802133
scale41	5.4814	0.00136625	4011.99	0
mu42	0.165031	0.000424261	388.986	0	0.999999999808217	0.999223742084407	-559924.779988936	39185	Es_0
shape42	0.776157	0.000249166	3115.02	0	0.999999999808207
scale42	6.09024	0.00158648	3838.83	0
mu43	0.168376	0.000436137	386.062	0	0.999999999720349	0.999126739866269	-550506.367702134	39212	Est
shape43	0.781183	0.000269425	2899.44	0	0.999999999720335
scale43	5.59813	0.00155501	3600.07	0
mu44	0.124408	0.000213472	582.785	0	0.999999999978997	0.999781805051469	-647610.012278311	39117	Et_0
shape44	0.771727	0.000139499	5532.13	0	0.999999999978996
scale44	6.92937	0.00136811	5064.92	0
mu45	0.13509	0.000302856	446.055	0	0.999999999907118	0.999520812921303	-596294.263000714	39119	Fi_0
shape45	0.778539	0.000200122	3890.32	0	0.999999999907113
scale45	5.80668	0.0012483	4651.67	0
mu46	0.157289	0.000409374	384.219	0	0.999999999888615	0.999463125788017	-583163.33057557	39184	Fr_2
shape46	0.783679	0.000229445	3415.53	0	0.999999999888609
scale46	6.38767	0.001541	4145.14	0
mu47	0.170793	0.000423195	403.58	0	0.999999999847563	0.999316724107279	-570698.637732624	39189	Fr_2_bud
shape47	0.781465	0.000233374	3348.55	0	0.999999999847556
scale47	6.307	0.00152352	4139.76	0
mu48	0.127423	0.000330638	385.384	0	0.999999999909203	0.999540544569394	-591417.63705138	39109	Ga_0
shape48	0.770922	0.000212768	3623.29	0	0.999999999909198
scale48	6.1824	0.00145258	4256.16	0
mu49	0.149225	0.00032784	455.177	0	0.999999999888277	0.999471352371469	-591065.884346425	39164	Gel_1
shape49	0.783632	0.00020447	3832.51	0	0.999999999888272
scale49	5.94171	0.00124341	4778.55	0
mu50	0.168423	0.000439374	383.326	0	0.99999999983315	0.999240671927511	-564662.8615682	39169	Gie_0
shape50	0.775731	0.000229972	3373.15	0	0.999999999833141
scale50	6.58512	0.00158366	4158.17	0
mu51	-0.0487	0.00074894	-65.0252	0	0.999999999854302	0.99949406349819	-605577.40719425	39297	Gifu_2
shape51	0.919846	0.000234832	3917.04	0	0.999999999854294
scale51	7.66936	0.00134583	5698.6	0
mu52	0.100084	0.000235211	425.507	0	0.999999999969079	0.99976699007708	-638129.273182815	39009	Got_7
shape52	0.783213	0.000160817	4870.23	0	0.999999999969078
scale52	5.92092	0.0011025	5370.46	0
mu53	0.115453	0.000196047	588.906	0	0.999999999977704	0.999792985469393	-648404.349814938	38942	Gr_1
shape53	0.763689	0.00013561	5631.52	0	0.999999999977703
scale53	6.42806	0.00120578	5331.04	0
mu54	0.128075	0.000286927	446.368	0	0.999999999912472	0.999567563945005	-601068.35373262	39116	Gre_0
shape54	0.783793	0.000199472	3929.35	0	0.999999999912468
scale54	5.65071	0.00115895	4875.72	0
mu55	0.0939573	0.000200071	469.621	0	0.999999999987207	0.999856612102612	-676030.718769964	38999	Gu_0
shape55	0.80165	0.000121574	6593.95	0	0.999999999987207
scale55	6.58852	0.00102505	6427.5	0
mu56	0.148923	0.000357877	416.129	0	0.999999999788452	0.999230414418593	-555832.711534787	39083	Gy_0
shape56	0.758298	0.000249103	3044.12	0	0.999999999788441
scale56	5.74915	0.00158879	3618.56	0
mu57	0.171464	0.000336106	510.15	0	0.999999999820242	0.999212212017557	-562476.971364885	39201	HR_5_bud
shape57	0.745605	0.000218102	3418.61	0	0.999999999820233
scale57	6.35682	0.00169093	3759.37	0
mu58	0.138597	0.000388693	356.573	0	0.999999999842336	0.99941907677145	-577153.763542417	39206	Ha_0
shape58	0.799847	0.000249532	3205.39	0	0.999999999842328
scale58	5.45579	0.00133584	4084.16	0
mu59	0.124599	0.000356816	349.196	0	0.999999999883825	0.999518496910175	-585902.855874679	39066	Hey_1
shape59	0.781478	0.000229724	3401.81	0	0.999999999883819
scale59	5.59617	0.00137902	4058.07	0
mu60	0.124679	0.000327143	381.116	0	0.999999999858637	0.999438594816922	-575794.687820857	39130	Hs_0
shape60	0.758571	0.000230864	3285.79	0	0.99999999985863
scale60	5.50967	0.00146214	3768.22	0
mu61	0.155572	0.000387523	401.453	0	0.999999999690711	0.999080298787555	-546890.389621465	39184	In_0
shape61	0.766396	0.000265715	2884.28	0	0.999999999690695
scale61	5.48876	0.00155772	3523.6	0
mu62	0.134596	0.000281239	478.581	0	0.999999999898823	0.999510521333978	-587496.756120522	38995	Is_0
shape62	0.760256	0.000207949	3655.96	0	0.999999999898818
scale62	5.73042	0.00132698	4318.39	0
mu63	0.154233	0.000346887	444.621	0	0.999999999825248	0.999300304833448	-569680.375792953	39170	Is_0_bud
shape63	0.765782	0.000227647	3363.9	0	0.999999999825239
scale63	5.62593	0.00136512	4121.19	0
mu64	0.127572	0.000264254	482.763	0	0.999999999949266	0.999635112236788	-613914.971124117	39097	Je_0
shape64	0.760219	0.000167733	4532.31	0	0.999999999949263
scale64	6.39221	0.00124877	5118.81	0
mu65	0.143814	0.000337237	426.45	0	0.999999999872706	0.999465840547819	-582487.505890603	39097	Jm_0
shape65	0.779453	0.00022927	3399.72	0	0.999999999872699
scale65	5.528	0.00132475	4172.88	0
mu66	0.120647	0.000226446	532.783	0	0.999999999969659	0.999732637924023	-633926.793881563	39109	Kas_1
shape66	0.77295	0.000147101	5254.55	0	0.999999999969658
scale66	6.78397	0.00137531	4932.68	0
mu67	0.124007	0.000361987	342.573	0	0.999999999893407	0.999575543512478	-589491.205156373	38918	Kelsterbach_4
shape67	0.787935	0.000234949	3353.63	0	0.999999999893402
scale67	5.48892	0.00138875	3952.42	0
mu68	0.148292	0.000374575	395.895	0	0.999999999901383	0.999519575136392	-589816.099498826	39113	Kil_0
shape68	0.790309	0.000224321	3523.12	0	0.999999999901378
scale68	6.24119	0.00144242	4326.9	0
mu69	0.12203	0.000247675	492.704	0	0.999999999965084	0.999698968503215	-625391.472663778	38948	Kin_0
shape69	0.759795	0.000162991	4661.57	0	0.999999999965082
scale69	6.56726	0.00117511	5588.65	0
mu70	0.152622	0.000304232	501.664	0	0.999999999894017	0.999438325266515	-587266.468028666	39159	Kin_0_bud
shape70	0.763947	0.000197472	3868.63	0	0.999999999894012
scale70	6.10553	0.00130506	4678.37	0
mu71	0.128254	0.00033498	382.869	0	0.999999999861642	0.999458194027202	-574723.320849201	39005	Kl_5
shape71	0.772135	0.000242469	3184.47	0	0.999999999861635
scale71	5.59702	0.00148086	3779.58	0
mu72	0.146032	0.000296546	492.442	0	0.999999999858256	0.999410393304687	-573262.595257951	39013	Knox_18
shape72	0.749553	0.000222546	3368.07	0	0.999999999858249
scale72	5.76019	0.00147659	3901	0
mu73	0.143969	0.000302629	475.728	0	0.999999999875832	0.999434540285359	-575495.839789305	38983	Kondara
shape73	0.75085	0.0002189	3430.11	0	0.999999999875825
scale73	5.94591	0.00149263	3983.51	0
mu74	0.10343	0.000287612	359.617	0	0.999999999920542	0.99963581706893	-606117.80686428	38993	Kro_0
shape74	0.797613	0.000207173	3849.99	0	0.999999999920538
scale74	5.20005	0.00109164	4763.52	0
mu75	0.155451	0.000373982	415.663	0	0.999999999771274	0.999249968230744	-557142.853844921	39095	Krot_0
shape75	0.765694	0.000257626	2972.12	0	0.999999999771263
scale75	5.55523	0.00154916	3585.96	0
mu76	0.147252	0.000371331	396.553	0	0.999999999797004	0.999268007914948	-560972.244954223	39089	Kyoto
shape76	0.772323	0.000249253	3098.56	0	0.999999999796993
scale76	5.58793	0.00147082	3799.2	0
mu77	0.132374	0.000284843	464.727	0	0.999999999929368	0.999590804306059	-599381.38224436	39060	Kz_9
shape77	0.759901	0.000202248	3757.28	0	0.999999999929364
scale77	6.19555	0.00138917	4459.89	0
mu78	0.153967	0.000344048	447.515	0	0.999999999801739	0.999248547010626	-561317.653822323	39152	La_0
shape78	0.756358	0.000239485	3158.27	0	0.999999999801728
scale78	5.72711	0.00150492	3805.58	0
mu79	0.106292	0.000237083	448.33	0	0.999999999916967	0.999707230132041	-625917.074334076	39097	Lan_0
shape79	0.830736	0.000206306	4026.72	0	0.999999999916962
scale79	4.47382	0.000885146	5054.33	0
mu80	0.124292	0.000243829	509.748	0	0.999999999960803	0.999667158180809	-617296.072209113	39019	Ler_1
shape80	0.745441	0.000160863	4634.01	0	0.999999999960801
scale80	6.7992	0.00134358	5060.51	0
mu81	0.143815	0.000327941	438.54	0	0.999999999889357	0.999455597587229	-587232.56144186	39172	Li_2_1_bud
shape81	0.770589	0.00020357	3785.39	0	0.999999999889351
scale81	6.02022	0.00130092	4627.68	0
mu82	0.142935	0.000365794	390.753	0	0.999999999872293	0.99944927086434	-574098.306855326	38914	Litva
shape82	0.769229	0.000238658	3223.14	0	0.999999999872286
scale82	6.0173	0.00157667	3816.47	0
mu83	0.161683	0.000389041	415.593	0	0.999999999653894	0.999008963443926	-542194.58858484	39154	Litva_bud
shape83	0.753554	0.000259709	2901.53	0	0.999999999653876
scale83	5.3548	0.00154473	3466.49	0
mu84	0.16184	0.000362097	446.952	0	0.999999999781129	0.99919965659848	-558856.845597736	39180	Lm_2
shape84	0.759975	0.000240578	3158.95	0	0.999999999781118
scale84	5.63668	0.00147417	3823.64	0
mu85	0.127386	0.000359555	354.288	0	0.999999999863038	0.999453912149138	-576852.998181653	38941	Lp2_2
shape85	0.787575	0.000233911	3366.98	0	0.999999999863031
scale85	5.4533	0.00132581	4113.17	0
mu86	0.126233	0.00023052	547.601	0	0.999999999985287	0.999813073051167	-663323.846185447	39116	Mc_0
shape86	0.789055	0.000132948	5935.08	0	0.999999999985286
scale86	7.31667	0.00104653	6991.39	0
mu87	0.157368	0.000434884	361.863	0	0.999999999822492	0.999348686369099	-572103.214963371	39197	Mh_0_bud
shape87	0.805134	0.000251209	3205.04	0	0.999999999822483
scale87	5.66182	0.00137204	4126.59	0
mu88	0.164769	0.000436878	377.152	0	0.999999999843158	0.999333314756259	-577743.690997628	39246	Ms_0_bud
shape88	0.815251	0.000232971	3499.37	0	0.99999999984315
scale88	6.06355	0.00133305	4548.63	0
mu89	0.144721	0.000346046	418.214	0	0.99999999977548	0.999216966101691	-560722.252326687	39151	Mz_0_bud
shape89	0.771287	0.000239546	3219.78	0	0.999999999775468
scale89	5.42821	0.00137537	3946.74	0
mu90	0.137918	0.000323136	426.811	0	0.999999999853993	0.999403721086819	-576287.403538695	39115	Nc_1_bud
shape90	0.763755	0.000226336	3374.43	0	0.999999999853985
scale90	5.54416	0.00136551	4060.15	0
mu91	0.151109	0.000420459	359.391	0	0.999999999807102	0.99928157954514	-561666.638431747	39141	Neo_6_bud
shape91	0.767167	0.000247639	3097.92	0	0.999999999807093
scale91	6.00293	0.001616	3714.69	0
mu92	0.14485	0.000349098	414.925	0	0.999999999920584	0.999529510765629	-599231.094404375	39179	Nok_3_bud
shape92	0.792209	0.000199295	3975.05	0	0.99999999992058
scale92	6.62111	0.00131604	5031.1	0
mu93	0.203624	0.000633021	321.67	0	0.999999999390167	0.998643914312867	-520094.18935065	39239	Np_0_bud
shape93	0.81169	0.000341716	2375.33	0	0.999999999390136
scale93	5.58439	0.0018006	3101.4	0
mu94	0.150378	0.000506643	296.813	0	0.999999999781353	0.999319698884866	-571696.21464203	39263	Nw_0_bud
shape94	0.85078	0.000272569	3121.34	0	0.999999999781342
scale94	5.53112	0.0013109	4219.34	0
mu95	0.148022	0.00031359	472.022	0	0.999999999867749	0.99936287860632	-580323.191644922	39211	Ob_0_bud
shape95	0.770904	0.000204381	3771.89	0	0.999999999867742
scale95	6.00863	0.00134934	4453	0
mu96	0.154747	0.000450031	343.858	0	0.999999999743918	0.999174487434352	-556706.434222633	39188	Old_1_bud
shape96	0.792716	0.000260689	3040.84	0	0.999999999743905
scale96	5.81971	0.00150094	3877.39	0
mu97	0.145522	0.000238487	610.188	0	0.999999999957106	0.999604698094592	-616997.070569889	39185	Ove_0_bud
shape97	0.739076	0.000144073	5129.86	0	0.999999999957104
scale97	7.24974	0.00130107	5572.15	0
mu98	0.142831	0.000294644	484.757	0	0.99999999993091	0.999607453580639	-598228.942672359	38879	Per_1
shape98	0.76005	0.000206979	3672.12	0	0.999999999930907
scale98	6.31943	0.00142577	4432.3	0
mu99	0.14935	0.000241283	618.985	0	0.999999999963875	0.99968163706391	-619670.444767173	38811	Pi_0
shape99	0.755351	0.000162996	4634.16	0	0.999999999963873
scale99	6.99809	0.00125943	5556.54	0
mu100	0.155748	0.000408847	380.944	0	0.999999999831045	0.99927597102921	-568329.103550651	39212	Pla_0_bud
shape100	0.785344	0.000234696	3346.21	0	0.999999999831037
scale100	6.15506	0.00146771	4193.64	0
mu101	0.118225	0.000210383	561.951	0	0.999999999980356	0.999792814584201	-663393.667388929	39131	Pna_17_bud
shape101	0.80024	0.000127278	6287.33	0	0.999999999980355
scale101	6.42294	0.000842163	7626.72	0
mu102	0.186279	0.000406647	458.085	0	0.999999999720059	0.999031397618832	-550326.301283394	39195	Pog_0_bud
shape102	0.765754	0.000237638	3222.35	0	0.999999999720045
scale102	5.99224	0.00152801	3921.59	0
mu103	0.127004	0.000227244	558.888	0	0.999999999972975	0.999717680919021	-635266.482962243	39127	Pro_0_bud
shape103	0.758007	0.000140918	5379.06	0	0.999999999972974
scale103	7.17938	0.00124392	5771.58	0
mu104	0.11904	0.000288417	412.735	0	0.999999999873776	0.999575262966998	-595095.601839223	38860	Pt_0
shape104	0.793248	0.000217925	3640.01	0	0.99999999987377
scale104	5.04862	0.00111426	4530.92	0
mu105	0.153521	0.000394114	389.534	0	0.999999999786413	0.999282258025367	-560294.646213484	39147	Pu2_23
shape105	0.782233	0.0002666	2934.11	0	0.999999999786402
scale105	5.52221	0.00151743	3639.19	0
mu106	0.18127	0.000347369	521.836	0	0.999999999802755	0.999135293287664	-556529.45057431	39170	Pu2_23_bud
shape106	0.731978	0.00021746	3366.04	0	0.999999999802745
scale106	6.2392	0.00160088	3897.36	0
mu107	0.120357	0.000273943	439.352	0	0.999999999967698	0.999737734404522	-633337.876104994	39037	Pu2_7_bud
shape107	0.782266	0.000169164	4624.31	0	0.999999999967696
scale107	6.69028	0.00121064	5526.24	0
mu108	0.137272	0.000364393	376.714	0	0.999999999896229	0.999553173992049	-593881.710613673	39132	Ra_0
shape108	0.801055	0.00023097	3468.22	0	0.999999999896223
scale108	5.68835	0.00130896	4345.69	0
mu109	0.107246	0.000189132	567.044	0	0.999999999990553	0.999849704613237	-672341.529536976	38834	Ragl_1
shape109	0.767298	0.000112486	6821.27	0	0.999999999990553
scale109	7.4154	0.00108912	6808.6	0
mu110	0.214153	0.000423886	505.213	0	0.999999999666075	0.998815804807566	-535688.124339643	39202	Ragl_1_bud
shape110	0.744346	0.000241204	3085.96	0	0.999999999666058
scale110	6.68654	0.00185588	3602.9	0
mu111	0.0648544	0.000689314	94.0854	0	0.99999999994863	0.999520284574121	-598527.852097343	38582	Rd_0
shape111	0.784725	0.000186367	4210.65	0	0.999999999948627
scale111	10.2905	0.00171423	6003.02	0
mu112	0.165377	0.000367919	449.492	0	0.999999999847863	0.999319975648906	-574187.999926237	39207	Rennes_1_bud
shape112	0.775075	0.000218454	3548	0	0.999999999847855
scale112	6.1125	0.00140178	4360.54	0
mu113	0.167044	0.000354028	471.837	0	0.99999999981945	0.999264567314354	-565326.688460023	39157	Rld_1_bud
shape113	0.752413	0.000225687	3333.88	0	0.999999999819441
scale113	5.83898	0.00146355	3989.59	0
mu114	0.201736	0.000484966	415.978	0	0.99999999970255	0.99896135123569	-544208.540174468	39243	Rmx_A02_bud
shape114	0.77404	0.000254511	3041.29	0	0.999999999702535
scale114	6.49109	0.00173037	3751.28	0
mu115	0.174219	0.000382136	455.909	0	0.999999999779331	0.999174724204753	-559867.075401851	39215	Rome_1_bud
shape115	0.77959	0.000239949	3248.99	0	0.99999999977932
scale115	5.98817	0.00152038	3938.6	0
mu116	0.175859	0.000454639	386.81	0	0.99999999981657	0.999243632144342	-564046.798244354	39150	RRS_7
shape116	0.797215	0.000248653	3206.13	0	0.99999999981656
scale116	6.21567	0.00151174	4111.59	0
mu117	0.185148	0.000396924	466.458	0	0.999999999684895	0.998924321450031	-537811.483469708	39171	Rubezhnoe_1_bud
shape117	0.744849	0.000256914	2899.21	0	0.999999999684879
scale117	6.00591	0.00175629	3419.65	0
mu118	0.158154	0.000429091	368.58	0	0.999999999805623	0.999257901435472	-562126.617602888	39167	Se_0_bud
shape118	0.785183	0.000251977	3116.09	0	0.999999999805613
scale118	6.05017	0.00155005	3903.22	0
mu119	0.132436	0.000321445	412.003	0	0.999999999893262	0.999486029706776	-590400.863867885	39170	Seattle_0
shape119	0.779499	0.000207408	3758.28	0	0.999999999893257
scale119	5.77101	0.001241	4650.29	0
mu120	0.166648	0.000412393	404.1	0	0.999999999865888	0.99935066872429	-574833.704880904	39223	Sei_0_bud
shape120	0.777918	0.000222959	3489.06	0	0.999999999865881
scale120	6.65373	0.00154655	4302.29	0
mu121	0.215456	0.000891355	241.718	0	0.999999999481187	0.998910302261744	-536380.622814269	39312	Sg_1
shape121	0.911927	0.000393016	2320.33	0	0.999999999481161
scale121	5.89538	0.00176191	3346.01	0
mu122	0.11951	0.000281832	424.048	0	0.999999999964477	0.999752468321901	-626413.333066731	38877	Si_0
shape122	0.782373	0.000188577	4148.82	0	0.999999999964476
scale122	6.44706	0.00143205	4501.99	0
mu123	0.182113	0.000321381	566.66	0	0.999999999863334	0.999258423644607	-569754.305431669	39231	Sorbo_bud
shape123	0.736324	0.000199332	3693.95	0	0.999999999863327
scale123	6.8544	0.00168911	4058.01	0
mu124	0.228919	0.000463956	493.406	0	0.999999999653255	0.998834311722754	-535349.642908142	39252	Sp_0_bud
shape124	0.753288	0.000259186	2906.36	0	0.999999999653237
scale124	6.38517	0.00185287	3446.1	0
mu125	0.223034	0.000456583	488.486	0	0.999999999637991	0.998838003176259	-533994.446205931	39217	Sq_8_bud
shape125	0.743348	0.000261636	2841.15	0	0.999999999637972
scale125	6.27776	0.00187981	3339.58	0
mu126	0.126272	0.000164844	766.007	0	0.999999999915838	0.999576194827686	-594479.214708238	39011	Stw_0
shape126	0.773942	0.000188051	4115.61	0	0.999999999915834
scale126	5.96436	0.00129575	4603.03	0
mu127	0.137203	0.000236666	579.732	0	0.999999999959085	0.999701910757547	-620972.147258246	38870	Su_0
shape127	0.758032	0.000164998	4594.2	0	0.999999999959083
scale127	6.34469	0.00121368	5227.63	0
mu128	0.215905	0.00058202	370.958	0	0.999999999478037	0.998679049651717	-522004.548794034	39253	Sus_1_bud
shape128	0.792574	0.000322592	2456.89	0	0.999999999478011
scale128	5.84859	0.00186812	3130.74	0
mu129	0.2111	0.000614598	343.476	0	0.99999999960175	0.998879083907614	-537643.534690547	39255	Ta_0_bud
shape129	0.814472	0.000295609	2755.23	0	0.99999999960173
scale129	6.29809	0.00175123	3596.37	0
mu130	0.138486	0.000252881	547.633	0	0.999999999974316	0.999706680934864	-635321.853844419	39139	Tamm_2_bud
shape130	0.763318	0.000146133	5223.44	0	0.999999999974315
scale130	7.61444	0.00120576	6315.08	0
mu131	0.22308	0.000615765	362.282	0	0.999999999626035	0.998876299159879	-538236.777444071	39277	Tol_0_bud
shape131	0.813516	0.000294667	2760.79	0	0.999999999626016
scale131	6.50499	0.00180401	3605.86	0
mu132	0.186658	0.00044133	422.945	0	0.999999999819661	0.999204852822951	-565912.248094612	39266	Tscha_1_bud
shape132	0.787323	0.000226374	3477.98	0	0.999999999819652
scale132	6.6433	0.00152804	4347.59	0
mu133	0.198293	0.000426984	464.403	0	0.999999999661314	0.99890890758929	-540625.666379278	39243	Tu_0_bud
shape133	0.750128	0.000248582	3017.62	0	0.999999999661297
scale133	6.22355	0.00173684	3583.26	0
mu134	0.221045	0.000556374	397.296	0	0.999999999526273	0.998744802153967	-528288.934627216	39257	Ty_0_bud
shape134	0.792527	0.000303404	2612.11	0	0.999999999526249
scale134	5.94124	0.00178666	3325.32	0
mu135	0.122428	0.000385713	317.408	0	0.999999999867419	0.999503746003971	-585440.899287483	39182	Uk_1
shape135	0.804333	0.000243493	3303.31	0	0.999999999867412
scale135	5.43558	0.00132805	4092.91	0
mu136	0.185634	0.000503334	368.809	0	0.999999999738129	0.999106002019967	-554674.985725509	39229	Uk_1_bud
shape136	0.803817	0.00025607	3139.05	0	0.999999999738115
scale136	6.20981	0.00154329	4023.75	0
mu137	0.21512	0.000425306	505.799	0	0.999999999649042	0.998772309288074	-532707.446230181	39193	Uod_1_bud
shape137	0.729263	0.000240718	3029.53	0	0.999999999649024
scale137	6.84485	0.00201918	3389.92	0
mu138	0.188011	0.000607961	309.249	0	0.999999999835484	0.999313748889662	-574960.299472559	39280	Utrecht_bud
shape138	0.854737	0.000259346	3295.75	0	0.999999999835476
scale138	6.80642	0.00152158	4473.27	0
mu139	0.237128	0.000581106	408.063	0	0.999999999418397	0.998556410618129	-519649.316992677	39280	Van_0_bud
shape139	0.786832	0.000314218	2504.1	0	0.999999999418367
scale139	5.94899	0.00187848	3166.92	0
mu140	0.119376	0.000265812	449.101	0	0.999999999965226	0.99972756259168	-626909.199833337	38895	Vind_1
shape140	0.775349	0.000170215	4555.12	0	0.999999999965224
scale140	6.47683	0.00126266	5129.53	0
mu141	0.156717	0.000410397	381.867	0	0.999999999691344	0.999095662366704	-544741.129590977	39165	Wa_1
shape141	0.775416	0.000280938	2760.1	0	0.999999999691328
scale141	5.32744	0.00157908	3373.77	0
mu142	0.207102	0.000552274	374.999	0	0.99999999951213	0.998722885449998	-524814.413184965	39216	Westkar_4_bud
shape142	0.780899	0.000308002	2535.37	0	0.999999999512105
scale142	5.94186	0.00186506	3185.88	0
mu143	0.213836	0.000586257	364.748	0	0.999999999516749	0.998727831825432	-529526.351938932	39269	Wl_0_bud
shape143	0.809622	0.000303519	2667.45	0	0.999999999516724
scale143	6.05183	0.00175138	3455.47	0
mu144	0.158748	0.000401728	395.163	0	0.999999999834722	0.999302114718484	-573253.124482023	39209	Ws_2_bud
shape144	0.796491	0.000224858	3542.2	0	0.999999999834713
scale144	6.08455	0.00135955	4475.41	0
mu145	0.136282	0.000401532	339.405	0	0.999999999816068	0.999349510671962	-570219.945110727	39170	Wt_5
shape145	0.78786	0.000248031	3176.46	0	0.999999999816059
scale145	5.51069	0.00139565	3948.48	0
mu146	0.12605	0.000343388	367.078	0	0.999999999934534	0.999659391357658	-607225.1658393	38871	Yo_0
shape146	0.798438	0.000205827	3879.16	0	0.999999999934531
scale146	5.85471	0.00126877	4614.46	0
mu147	0.13089	0.00035805	365.564	0	0.999999999861526	0.999432840051219	-579290.940133132	39155	Zdr_1
shape147	0.787024	0.000234492	3356.3	0	0.999999999861518
scale147	5.57282	0.0013302	4189.47	0
mu148	0.175829	0.000419842	418.797	0	0.999999999751696	0.999109252730911	-553395.772246828	39205	Zdr_1_bud
shape148	0.77175	0.00024535	3145.5	0	0.999999999751683
scale148	5.94388	0.00153707	3867.02	0
mu149	0.148891	0.000348409	427.347	0	0.999999999950867	0.999643680490233	-618201.928953915	39177	Er_0
shape149	0.811082	0.000193774	4185.72	0	0.999999999950865
scale149	7.18222	0.00150988	4756.8	0
mu150	0.163867	0.000344584	475.551	0	0.999999999842907	0.999288958010969	-571780.946248751	39199	Er_0_bud
shape150	0.759201	0.000211131	3595.88	0	0.999999999842899
scale150	6.11669	0.00141384	4326.3	0

## Sheet: 3250bp
					Non-linear fits for I[R] Arabidopsis Thaliana ecotypes
							Genomic region3250bp
	The two methods of model validation were used:
	1) Data splitting-Randomly split the data, obtain a prediction equation on one half
	of the random split and then check its predictive power (cross-validate) on the other
	sample.
	2) An estimate of the average predictive power of the equation on many other samples
	from the same population, using a formula due to Stein
Reference	J. P. Stevens, Applied Multivariate Statistics for the Social Sciences. (Routledge Academic, Fifth Edit., 2009)
	Estimate	Std. Error	t value	Pr(>|t|))	Adj.R.Square	R.Cross.val	AIC	sample.size	Sample
mu	0.136469	0.000396688	344.022	0	0.999999999882976	0.999460328903906	-539532.769438404	36210	Aa_0
shape	0.793765	0.000244428	3247.43	0	0.999999999882969
scale	5.96438	0.00144536	4126.57	0
mu1	0.135875	0.000348739	389.62	0	0.999999999915264	0.999549451434438	-549079.891899998	36226	Abd_0
shape1	0.776268	0.000225751	3438.6	0	0.999999999915259
scale1	5.99383	0.00142537	4205.11	0
mu2	0.129193	0.000277615	465.367	0	0.999999999976778	0.999756393840734	-584879.683501043	36022	Ag_0
shape2	0.763322	0.000180502	4228.89	0	0.999999999976777
scale2	7.60954	0.00161828	4702.23	0
mu3	0.150998	0.000372748	405.094	0	0.999999999908719	0.999469566399818	-542648.107457337	36173	Ag_0_bud
shape3	0.781285	0.000222556	3510.51	0	0.999999999908714
scale3	6.64043	0.00151764	4375.51	0
mu4	0.117453	0.000314959	372.915	0	0.999999999970402	0.99978628792157	-587598.621129002	35962	Ak_1
shape4	0.799215	0.000207856	3845.05	0	0.999999999970401
scale4	6.47016	0.00146595	4413.62	0
mu5	0.148745	0.000354999	419	0	0.999999999921764	0.999545783232097	-545124.50877857	36147	Altai_5
shape5	0.756267	0.000228657	3307.43	0	0.99999999992176
scale5	6.61307	0.00171805	3849.17	0
mu6	0.177548	0.000586119	302.922	0	0.99999999979613	0.999260935106622	-515271.573652118	36059	Amel_1
shape6	0.81227	0.0002869	2831.2	0	0.999999999796119
scale6	6.12275	0.00169804	3605.78	0
mu7	0.134535	0.000342362	392.962	0	0.99999999993916	0.999608019434674	-562057.419950601	36174	An_1
shape7	0.800718	0.000212998	3759.27	0	0.999999999939156
scale7	6.44564	0.00136049	4737.73	0
mu8	0.131392	0.000375136	350.253	0	0.999999999950495	0.999702460645749	-566098.688117098	35958	Anholt_1
shape8	0.791603	0.000216312	3659.54	0	0.999999999950492
scale8	6.46795	0.00153102	4224.61	0
mu9	-0.00102136	0.000802532	-1.27267	0.203145	0.999999999957662	0.999519533652772	-553697.211063546	35678	Ann_1
shape9	0.819751	0.000203081	4036.56	0	0.99999999995766
scale9	11.6665	0.0019234	6065.56	0
mu10	0.130095	0.000377834	344.319	0	0.999999999887257	0.999452389995564	-538368.013005867	36199	Anz_0
shape10	0.774273	0.000231726	3341.32	0	0.99999999988725
scale10	6.09365	0.00149752	4069.17	0
mu11	0.133487	0.000357174	373.732	0	0.999999999934158	0.999625484451862	-553331.085374964	36010	Appt_1
shape11	0.776893	0.000227075	3421.3	0	0.999999999934154
scale11	6.3484	0.00162146	3915.23	0
mu12	0.0988623	0.000246735	400.682	0	0.999999999987106	0.999850273000281	-615827.245455284	36023	Ba_1
shape12	0.789983	0.000154837	5102.02	0	0.999999999987106
scale12	6.98102	0.00128361	5438.59	0
mu13	0.117594	0.000333756	352.336	0	0.999999999964438	0.999746480989229	-577084.052173981	36087	Baa_1
shape13	0.775959	0.000207073	3747.27	0	0.999999999964436
scale13	6.66631	0.00150921	4417.1	0
mu14	0.119363	0.00035797	333.445	0	0.999999999946687	0.999699711533673	-567756.7208883	35978	Benk_1
shape14	0.801699	0.000219196	3657.45	0	0.999999999946684
scale14	6.03456	0.00138003	4372.76	0
mu15	-0.0207173	0.000835199	-24.8052	1.08344e-134	0.999999999940318	0.999410125337812	-545535.256188775	35823	Bik_1
shape15	0.842411	0.000228999	3678.67	0	0.999999999940315
scale15	10.1825	0.00179598	5669.62	0
mu16	0.148428	0.000383948	386.583	0	0.999999999917775	0.999538770714891	-551322.786853247	36196	Bl_1
shape16	0.800867	0.000223838	3577.89	0	0.99999999991777
scale16	6.43106	0.0013971	4603.14	0
mu17	0.152645	0.000446732	341.692	0	0.999999999868311	0.999422858920464	-529936.931624618	36140	Bla_1
shape17	0.792503	0.000261579	3029.68	0	0.999999999868303
scale17	6.27531	0.00171099	3667.65	0
mu18	0.111455	0.000299088	372.649	0	0.999999999984781	0.99982176135363	-606337.630082052	36075	Boot_1
shape18	0.803421	0.000155121	5179.31	0	0.99999999998478
scale18	7.54979	0.00137672	5483.9	0
mu19	0.0266944	0.00104783	25.4758	6.49182e-142	0.9999999999833	0.999742562613673	-607148.642619784	36295	Bor_4
shape19	0.909741	0.000191081	4761.01	0	0.999999999983299
scale19	11.9727	0.00175654	6816.06	0
mu20	0.0687795	0.000435175	158.05	0	0.999999999990659	0.999824246393871	-634019.501283156	36279	Bor_4_bud
shape20	0.835817	0.000123754	6753.87	0	0.999999999990659
scale20	9.01904	0.00093017	9696.12	0
mu21	0.174505	0.000419905	415.581	0	0.999999999808963	0.999149961008518	-514569.718826722	36188	Br_0_bud
shape21	0.762013	0.000244038	3122.51	0	0.999999999808953
scale21	6.37809	0.00168307	3789.57	0
mu22	0.125108	0.00031549	396.552	0	0.999999999976911	0.999765285420993	-596556.583785947	36181	Bs_1
shape22	0.81928	0.000165843	4940.08	0	0.99999999997691
scale22	7.29857	0.00121556	6004.3	0
mu23	0.132255	0.00045365	291.536	0	0.99999999982007	0.999336373890169	-526554.942570215	36256	Bsch_0
shape23	0.815016	0.000273951	2975.04	0	0.99999999982006
scale23	5.58852	0.00143676	3889.66	0
mu24	0.194111	0.000909134	213.513	0	0.999999999694612	0.999111010923357	-507318.611729907	36285	Bu_0
shape24	0.902892	0.000379333	2380.21	0	0.999999999694595
scale24	6.28313	0.00184287	3409.43	0
mu25	0.135681	0.000321723	421.732	0	0.999999999938805	0.999615867342043	-563304.337209333	36169	Ca_0
shape25	0.788546	0.000205145	3843.84	0	0.999999999938801
scale25	6.17968	0.00127575	4843.95	0
mu26	0.165858	0.000555097	298.791	0	0.999999999687601	0.999049465223662	-502501.77637479	36213	Cal_0
shape26	0.805991	0.000303601	2654.77	0	0.999999999687584
scale26	5.86735	0.00172195	3407.39	0
mu27	0.123304	0.00036104	341.526	0	0.999999999943181	0.999679089970906	-560789.498024039	36068	Chat_1
shape27	0.787105	0.000237629	3312.33	0	0.999999999943178
scale27	6.24374	0.00167814	3720.63	0
mu28	0.201056	0.000553355	363.341	0	0.999999999769919	0.99909674066971	-507487.283609747	36126	Chi_0
shape28	0.791915	0.000272557	2905.5	0	0.999999999769906
scale28	6.76757	0.0018559	3646.53	0
mu29	0.110515	0.0002967	372.482	0	0.999999999990743	0.99983705762561	-615865.049665561	35895	Cnt_1
shape29	0.784501	0.000143346	5472.76	0	0.999999999990743
scale29	8.27148	0.00118102	7003.68	0
mu30	0.167995	0.000458379	366.499	0	0.999999999756238	0.999136630482977	-508676.910917478	36211	Co_1_bud
shape30	0.762992	0.000270208	2823.72	0	0.999999999756224
scale30	5.97805	0.00174936	3417.28	0
mu31	0.156039	0.000408548	381.936	0	0.999999999904947	0.999480591325931	-537662.139263739	35990	Com_1
shape31	0.776687	0.00022611	3435	0	0.999999999904941
scale31	6.53607	0.00159589	4095.57	0
mu32	0.0597249	0.000424721	140.621	0	0.999999999988899	0.999757916302014	-611504.504847094	36061	Cvi_0
shape32	0.781316	0.000129015	6056.03	0	0.999999999988898
scale32	8.78702	0.0010357	8484.1	0
mu33	0.149745	0.000384847	389.103	0	0.999999999913905	0.999489141210935	-545535.711848191	36176	Da_1_12
shape33	0.780332	0.000213323	3657.98	0	0.9999999999139
scale33	6.81591	0.00151814	4489.66	0
mu34	0.115335	0.00034887	330.597	0	0.999999999948142	0.999690933016606	-565322.560049412	35975	Db_1
shape34	0.789446	0.000218433	3614.14	0	0.999999999948139
scale34	6.16978	0.00145756	4232.96	0
mu35	0.113328	0.000333562	339.751	0	0.999999999981939	0.999790610525522	-591865.507529764	35865	Di_G
shape35	0.772792	0.000179354	4308.76	0	0.999999999981938
scale35	7.74909	0.00136247	5687.53	0
mu36	0.185593	0.000570259	325.454	0	0.999999999658889	0.998942375506655	-492666.334664132	36217	Dja_1
shape36	0.784552	0.000315473	2486.91	0	0.99999999965887
scale36	6.09492	0.0019953	3054.64	0
mu37	0.172069	0.000319061	539.298	0	0.999999999968926	0.999646361461483	-565276.738864385	35775	Ei_2
shape37	0.754958	0.00017561	4299.05	0	0.999999999968924
scale37	8.02893	0.00156441	5132.25	0
mu38	0.157314	0.000465065	338.263	0	0.999999999763188	0.999180609857856	-512181.837131148	36208	El_0
shape38	0.780799	0.000274069	2848.91	0	0.999999999763175
scale38	5.71164	0.00161831	3529.39	0
mu39	0.124869	0.000316092	395.04	0	0.999999999965481	0.999716641027514	-574729.503804005	36054	Ema_1
shape39	0.772775	0.000200582	3852.66	0	0.99999999996548
scale39	6.80273	0.00148129	4592.45	0
mu40	0.173126	0.000400253	432.542	0	0.999999999760945	0.999055886584266	-506776.762080243	36215	Ema_1_bud
shape40	0.759573	0.000250051	3037.67	0	0.999999999760932
scale40	6.21303	0.00171172	3629.7	0
mu41	0.164087	0.000498095	329.429	0	0.999999999774492	0.999240310094306	-513761.376578798	36099	En_D
shape41	0.796244	0.000289192	2753.34	0	0.999999999774479
scale41	5.83287	0.0016627	3508.08	0
mu42	0.184253	0.000502108	366.958	0	0.999999999798115	0.999137341267509	-510672.64065657	36209	Es_0
shape42	0.786203	0.000273455	2875.07	0	0.999999999798104
scale42	6.51884	0.00181435	3592.93	0
mu43	0.179978	0.000517774	347.599	0	0.999999999668463	0.998967143516426	-497694.910752151	36241	Est
shape43	0.785632	0.000304048	2583.9	0	0.999999999668444
scale43	5.90507	0.00181974	3245.01	0
mu44	0.116994	0.000278586	419.956	0	0.999999999984984	0.999814275357667	-606523.183479913	36185	Et_0
shape44	0.786049	0.000146969	5348.41	0	0.999999999984983
scale44	7.51418	0.0013893	5408.59	0
mu45	0.133152	0.000331342	401.855	0	0.999999999928186	0.999564268283856	-556073.53804907	36180	Fi_0
shape45	0.786897	0.000206559	3809.54	0	0.999999999928182
scale45	6.23002	0.00132285	4709.54	0
mu46	0.166684	0.000509199	327.346	0	0.999999999881347	0.999399569106094	-531870.524319701	36223	Fr_2
shape46	0.790524	0.000250491	3155.9	0	0.999999999881341
scale46	6.79566	0.00174101	3903.28	0
mu47	0.179681	0.000522712	343.747	0	0.999999999811764	0.999184618088133	-515004.166076208	36231	Fr_2_bud
shape47	0.786645	0.000262564	2996.01	0	0.999999999811754
scale47	6.64113	0.00178334	3723.98	0
mu48	0.130664	0.000399979	326.677	0	0.99999999991441	0.999543415698533	-544022.99393947	36144	Ga_0
shape48	0.774402	0.000233111	3322.03	0	0.999999999914405
scale48	6.59565	0.00171095	3854.96	0
mu49	0.157509	0.00040412	389.757	0	0.999999999870319	0.99937725128619	-536323.166864517	36203	Gel_1
shape49	0.792499	0.000225132	3520.16	0	0.999999999870312
scale49	6.30884	0.00142008	4442.59	0
mu50	0.185221	0.000463899	399.269	0	0.999999999844335	0.999233999208789	-519829.55211829	36214	Gie_0
shape50	0.776	0.000247296	3137.94	0	0.999999999844326
scale50	6.9899	0.00180612	3870.12	0
mu51	-0.0701408	0.000808691	-86.7338	0	0.999999999908302	0.999569587701021	-572769.206896338	36294	Gifu_2
shape51	0.942263	0.000227355	4144.45	0	0.999999999908297
scale51	8.29532	0.00137939	6013.78	0
mu52	0.10175	0.000264217	385.1	0	0.999999999975394	0.999781801833082	-594706.478566547	36127	Got_7
shape52	0.786471	0.000168057	4679.78	0	0.999999999975393
scale52	6.31825	0.00118401	5336.32	0
mu53	0.117033	0.000231058	506.508	0	0.999999999980639	0.999801121505991	-600527.315622821	36036	Gr_1
shape53	0.772248	0.000144789	5333.6	0	0.999999999980638
scale53	6.91291	0.00133081	5194.53	0
mu54	0.128475	0.000344515	372.915	0	0.999999999923728	0.999595163987203	-556515.733843174	36175	Gre_0
shape54	0.793099	0.000221474	3581	0	0.999999999923723
scale54	6.05566	0.0013361	4532.35	0
mu55	0.0872748	0.000218946	398.613	0	0.999999999993603	0.999909356086485	-646198.884957206	36098	Gu_0
shape55	0.808345	0.00014765	5474.72	0	0.999999999993603
scale55	7.1247	0.00121187	5879.12	0
mu56	0.169508	0.000448423	378.009	0	0.999999999788529	0.999193012293766	-509470.636437392	36176	Gy_0
shape56	0.760763	0.000277528	2741.21	0	0.999999999788517
scale56	6.0638	0.00183615	3302.45	0
mu57	0.185036	0.000396352	466.848	0	0.999999999852758	0.999234394228395	-522029.923880499	36238	HR_5_bud
shape57	0.749463	0.000229759	3261.95	0	0.99999999985275
scale57	6.80745	0.00177051	3844.92	0
mu58	0.143866	0.000432145	332.912	0	0.999999999859003	0.999407061838963	-532437.571493826	36216	Ha_0
shape58	0.803006	0.000264128	3040.22	0	0.999999999858995
scale58	5.8288	0.00148345	3929.22	0
mu59	0.129008	0.000441713	292.064	0	0.999999999863743	0.999428612083064	-532136.872226099	36161	Hey_1
shape59	0.793531	0.00025261	3141.32	0	0.999999999863735
scale59	5.9532	0.00153307	3883.2	0
mu60	0.136484	0.000386713	352.935	0	0.999999999866629	0.999426127924583	-529382.670677322	36158	Hs_0
shape60	0.76398	0.000251397	3038.94	0	0.999999999866621
scale60	5.87606	0.00166577	3527.53	0
mu61	0.169762	0.000463919	365.931	0	0.999999999703812	0.999051682897714	-502248.038597804	36220	In_0
shape61	0.773563	0.00028805	2685.51	0	0.999999999703796
scale61	5.84231	0.00176322	3313.43	0
mu62	0.128287	0.00032276	397.469	0	0.999999999910301	0.999519730670793	-543243.491242331	36094	Is_0
shape62	0.768449	0.000220632	3482.95	0	0.999999999910296
scale62	6.13813	0.00150173	4087.37	0
mu63	0.15774	0.000411333	383.485	0	0.999999999825754	0.999269290240544	-521830.277159798	36217	Is_0_bud
shape63	0.777236	0.000249314	3117.5	0	0.999999999825745
scale63	6.03603	0.00156974	3845.25	0
mu64	0.135927	0.000332834	408.393	0	0.999999999951447	0.999632853677746	-564583.33422956	36149	Je_0
shape64	0.768816	0.00018939	4059.44	0	0.999999999951444
scale64	6.84727	0.00145265	4713.66	0
mu65	0.14738	0.00039983	368.607	0	0.999999999859978	0.999389105980381	-530763.537204374	36162	Jm_0
shape65	0.787505	0.000252881	3114.14	0	0.99999999985997
scale65	5.89024	0.00149399	3942.63	0
mu66	0.125146	0.000285789	437.896	0	0.999999999975171	0.999749255119061	-589056.907570987	36185	Kas_1
shape66	0.781802	0.000157054	4977.93	0	0.99999999997517
scale66	7.30368	0.0014451	5054.11	0
mu67	0.129475	0.000414104	312.664	0	0.999999999894463	0.999537894585121	-541463.204423807	36019	Kelsterbach_4
shape67	0.794549	0.000239806	3313.3	0	0.999999999894458
scale67	5.81237	0.00146218	3975.14	0
mu68	0.151642	0.000480368	315.679	0	0.999999999892144	0.999474023017923	-537353.779410923	36164	Kil_0
shape68	0.798524	0.000255029	3131.11	0	0.999999999892138
scale68	6.63844	0.00171748	3865.23	0
mu69	0.124626	0.000280497	444.303	0	0.999999999970114	0.99971833126402	-579812.186823269	36053	Kin_0
shape69	0.767702	0.000178666	4296.85	0	0.999999999970113
scale69	7.08275	0.00134137	5280.23	0
mu70	0.161799	0.000371099	435.999	0	0.999999999903253	0.999431609504931	-541434.796533211	36203	Kin_0_bud
shape70	0.772145	0.000216508	3566.36	0	0.999999999903248
scale70	6.54194	0.00149112	4387.26	0
mu71	0.148315	0.000431131	344.015	0	0.999999999857562	0.999416225030931	-525862.546996406	36077	Kl_5
shape71	0.779578	0.000270345	2883.64	0	0.999999999857554
scale71	5.95131	0.00174399	3412.46	0
mu72	0.149199	0.000398233	374.653	0	0.999999999853746	0.999384848893622	-524722.824955176	36106	Knox_18
shape72	0.757136	0.000248998	3040.73	0	0.999999999853738
scale72	6.14349	0.00175033	3509.9	0
mu73	0.145024	0.000366146	396.082	0	0.999999999880927	0.999384723503665	-529277.616745315	36072	Kondara
shape73	0.751347	0.000227393	3304.18	0	0.999999999880921
scale73	6.3368	0.00163051	3886.39	0
mu74	0.120459	0.000346486	347.66	0	0.999999999924556	0.99963230075286	-558214.63979827	36084	Kro_0
shape74	0.802016	0.000234277	3423.37	0	0.999999999924552
scale74	5.51733	0.00129246	4268.86	0
mu75	0.162805	0.000447776	363.586	0	0.999999999770441	0.999202808386416	-510263.580410969	36147	Krot_0
shape75	0.769291	0.000281011	2737.58	0	0.999999999770428
scale75	5.85772	0.00177787	3294.8	0
mu76	0.161761	0.000450228	359.288	0	0.99999999980544	0.999256559641011	-515630.373099729	36149	Kyoto
shape76	0.776929	0.000269668	2881.05	0	0.999999999805429
scale76	5.92202	0.00169242	3499.15	0
mu77	0.134666	0.000358542	375.592	0	0.999999999936594	0.999589896644817	-553692.918003026	36127	Kz_9
shape77	0.764642	0.00021614	3537.72	0	0.99999999993659
scale77	6.63967	0.00156696	4237.29	0
mu78	0.165186	0.000395871	417.273	0	0.999999999824721	0.999246792788997	-518782.492856825	36203	La_0
shape78	0.757523	0.000250231	3027.29	0	0.999999999824711
scale78	6.07678	0.00165779	3665.58	0
mu79	0.0936522	0.000255113	367.101	0	0.99999999994521	0.999730900248886	-589226.671570183	36150	Lan_0
shape79	0.838381	0.000189102	4433.49	0	0.999999999945207
scale79	4.80987	0.000828985	5802.12	0
mu80	0.127578	0.000281626	453.004	0	0.999999999971444	0.999712415955906	-577793.79585129	36100	Ler_1
shape80	0.749538	0.000173985	4308.06	0	0.999999999971442
scale80	7.3152	0.00153244	4773.58	0
mu81	0.172472	0.000415075	415.521	0	0.999999999852891	0.999303104874006	-527585.898396903	36198	Li_2_1_bud
shape81	0.777891	0.000236671	3286.8	0	0.999999999852883
scale81	6.34519	0.00155138	4090.04	0
mu82	0.154632	0.000426248	362.775	0	0.999999999884203	0.999447783222201	-530218.285458712	36026	Litva
shape82	0.770127	0.00024757	3110.74	0	0.999999999884197
scale82	6.40349	0.00177363	3610.4	0
mu83	0.18314	0.000463986	394.71	0	0.999999999601908	0.998853688777025	-491430.814237324	36209	Litva_bud
shape83	0.76052	0.000293549	2590.78	0	0.999999999601886
scale83	5.6782	0.00180915	3138.6	0
mu84	0.170359	0.000422412	403.301	0	0.999999999788053	0.999160082053047	-513059.819422183	36221	Lm_2
shape84	0.765923	0.00026115	2932.89	0	0.999999999788042
scale84	6.03247	0.00168534	3579.39	0
mu85	0.134947	0.00042406	318.227	0	0.999999999853389	0.999391038839618	-526704.714549139	36039	Lp2_2
shape85	0.787287	0.000253173	3109.67	0	0.999999999853381
scale85	5.72198	0.00150146	3810.94	0
mu86	0.124361	0.000321385	386.953	0	0.999999999982434	0.999790262165528	-602671.507690565	36187	Mc_0
shape86	0.799687	0.000157436	5079.44	0	0.999999999982433
scale86	7.83153	0.00134335	5829.86	0
mu87	0.171376	0.000514039	333.392	0	0.999999999809123	0.999266678796346	-521766.725378538	36238	Mh_0_bud
shape87	0.816891	0.000274629	2974.52	0	0.999999999809112
scale87	6.03155	0.00155077	3889.39	0
mu88	0.1777	0.000519525	342.043	0	0.999999999826541	0.999280526668296	-525551.766863228	36265	Ms_0_bud
shape88	0.824498	0.000269602	3058.21	0	0.999999999826532
scale88	6.44402	0.00159587	4037.93	0
mu89	0.14877	0.000393714	377.864	0	0.999999999810208	0.999264254181304	-520295.503067211	36215	Mz_0_bud
shape89	0.773561	0.000254316	3041.73	0	0.999999999810198
scale89	5.8079	0.00155247	3741.06	0
mu90	0.142347	0.00035513	400.831	0	0.999999999862463	0.999390602769449	-530507.428624003	36191	Nc_1_bud
shape90	0.768922	0.000238611	3222.49	0	0.999999999862455
scale90	5.91413	0.00152623	3874.98	0
mu91	0.15521	0.000487081	318.653	0	0.999999999801221	0.999231238488926	-513573.582780495	36187	Neo_6_bud
shape91	0.774103	0.000266785	2901.6	0	0.99999999980121
scale91	6.42623	0.00186412	3447.32	0
mu92	0.165573	0.000440772	375.642	0	0.999999999909576	0.999445488056278	-544336.884789109	36223	Nok_3_bud
shape92	0.792322	0.00021671	3656.15	0	0.999999999909571
scale92	6.99947	0.00151783	4611.49	0
mu93	0.228683	0.000741824	308.271	0	0.99999999938355	0.998560019344523	-475412.109102644	36262	Np_0_bud
shape93	0.81668	0.000375528	2174.75	0	0.999999999383516
scale93	5.9024	0.00205598	2870.84	0
mu94	0.152552	0.000598132	255.047	0	0.999999999795773	0.999296879488945	-526057.846694337	36271	Nw_0_bud
shape94	0.862352	0.000294732	2925.89	0	0.999999999795762
scale94	5.89992	0.00146786	4019.41	0
mu95	0.155763	0.000376102	414.152	0	0.999999999878285	0.999351155170934	-534624.826864589	36243	Ob_0_bud
shape95	0.778141	0.000220238	3533.17	0	0.999999999878278
scale95	6.43545	0.00148818	4324.38	0
mu96	0.177271	0.00054973	322.47	0	0.999999999715623	0.999072338949362	-506251.772720155	36231	Old_1_bud
shape96	0.800348	0.000288759	2771.68	0	0.999999999715607
scale96	6.17029	0.00174232	3541.43	0
mu97	0.167806	0.000292327	574.036	0	0.999999999956818	0.999586167523136	-565297.10325458	36231	Ove_0_bud
shape97	0.743389	0.000164769	4511.7	0	0.999999999956816
scale97	7.76861	0.00148007	5248.81	0
mu98	0.144637	0.000331365	436.488	0	0.99999999993933	0.99960551940897	-554007.726352752	35996	Per_1
shape98	0.765799	0.000214078	3577.2	0	0.999999999939327
scale98	6.77106	0.00162514	4166.45	0
mu99	0.162483	0.000302863	536.49	0	0.999999999962648	0.999653306971154	-568085.415091025	35948	Pi_0
shape99	0.758298	0.000181364	4181.08	0	0.999999999962646
scale99	7.47136	0.0014739	5069.1	0
mu100	0.184977	0.000488027	379.031	0	0.999999999829493	0.999219192865458	-520002.555182569	36251	Pla_0_bud
shape100	0.78609	0.000253848	3096.69	0	0.999999999829484
scale100	6.50926	0.00167241	3892.15	0
mu101	0.120366	0.000262534	458.477	0	0.999999999982789	0.999786735798299	-613525.646301098	36176	Pna_17_bud
shape101	0.810127	0.000134178	6037.7	0	0.999999999982788
scale101	6.88604	0.00088103	7815.9	0
mu102	0.201753	0.000485945	415.176	0	0.999999999718256	0.99896609978084	-503745.518944665	36233	Pog_0_bud
shape102	0.769803	0.000256196	3004.74	0	0.99999999971824
scale102	6.39139	0.00173404	3685.84	0
mu103	0.138526	0.000289945	477.765	0	0.99999999997515	0.999730545651034	-585585.883138635	36183	Pro_0_bud
shape103	0.764891	0.000162812	4697.99	0	0.999999999975149
scale103	7.75	0.00145913	5311.4	0
mu104	0.125431	0.000335835	373.491	0	0.999999999871168	0.999521993732225	-546269.708358585	36008	Pt_0
shape104	0.80037	0.000223888	3574.86	0	0.999999999871161
scale104	5.33727	0.00117158	4555.6	0
mu105	0.147484	0.000486549	303.123	0	0.999999999789062	0.999234788666253	-513278.010150782	36177	Pu2_23
shape105	0.791878	0.000289042	2739.66	0	0.99999999978905
scale105	5.88688	0.00171901	3424.57	0
mu106	0.182208	0.000392708	463.977	0	0.999999999822123	0.999151944345483	-513496.451806068	36228	Pu2_23_bud
shape106	0.737048	0.000236032	3122.66	0	0.999999999822113
scale106	6.66998	0.00182837	3648.04	0
mu107	0.14379	0.00034378	418.261	0	0.999999999965485	0.999701493927186	-578314.740705413	36083	Pu2_7_bud
shape107	0.792006	0.000182955	4328.97	0	0.999999999965483
scale107	7.17558	0.00134482	5335.7	0
mu108	0.126508	0.000454011	278.646	0	0.999999999904106	0.999552788054212	-547526.960188704	36188	Ra_0
shape108	0.813219	0.000246797	3295.09	0	0.999999999904101
scale108	6.07691	0.00146869	4137.65	0
mu109	0.114436	0.000260984	438.477	0	0.999999999989875	0.999832836934275	-615327.480223886	35958	Ragl_1
shape109	0.777713	0.000138332	5622.09	0	0.999999999989874
scale109	7.98813	0.00120597	6623.82	0
mu110	0.232155	0.000497916	466.254	0	0.999999999705876	0.998833035579741	-494877.449853596	36236	Ragl_1_bud
shape110	0.745668	0.000260721	2860.02	0	0.99999999970586
scale110	7.15603	0.00212397	3369.17	0
mu111	0.0272028	0.00072097	37.7309	1.58611e-305	0.999999999963816	0.999563698610307	-562148.089987744	35721	Rd_0
shape111	0.809306	0.000188122	4302.04	0	0.999999999963814
scale111	11.2318	0.00177662	6322	0
mu112	0.180461	0.000456377	395.42	0	0.999999999824301	0.999207948235917	-520749.836168981	36239	Rennes_1_bud
shape112	0.783117	0.000243113	3221.2	0	0.999999999824291
scale112	6.52863	0.00163027	4004.63	0
mu113	0.168904	0.000404505	417.556	0	0.99999999982421	0.999198657740093	-519004.550761992	36211	Rld_1_bud
shape113	0.758588	0.000235426	3222.19	0	0.9999999998242
scale113	6.26656	0.00161434	3881.81	0
mu114	0.220197	0.000575196	382.821	0	0.999999999708969	0.998881296029258	-498785.531420597	36259	Rmx_A02_bud
shape114	0.781962	0.000274173	2852.08	0	0.999999999708953
scale114	6.96283	0.00195832	3555.52	0
mu115	0.189742	0.000446957	424.521	0	0.999999999798308	0.999148909142795	-515687.511938195	36241	Rome_1_bud
shape115	0.784661	0.000254511	3083.02	0	0.999999999798297
scale115	6.38054	0.00169277	3769.29	0
mu116	0.183965	0.00058084	316.722	0	0.99999999981413	0.999212788847316	-516363.155811475	36208	RRS_7
shape116	0.803929	0.000282368	2847.09	0	0.99999999981412
scale116	6.61683	0.00178259	3711.92	0
mu117	0.198186	0.000486419	407.438	0	0.999999999664976	0.998801915123953	-490144.856011229	36211	Rubezhnoe_1_bud
shape117	0.749182	0.000283384	2643.7	0	0.999999999664958
scale117	6.40016	0.00203109	3151.1	0
mu118	0.183185	0.00053196	344.359	0	0.999999999769994	0.999135398070501	-508525.594011082	36215	Se_0_bud
shape118	0.791709	0.000282169	2805.8	0	0.999999999769982
scale118	6.4185	0.00182109	3524.54	0
mu119	0.128859	0.000390441	330.035	0	0.999999999899677	0.999465240927417	-543334.678609664	36210	Seattle_0
shape119	0.789509	0.000221639	3562.13	0	0.999999999899671
scale119	6.16804	0.00137739	4478.06	0
mu120	0.192596	0.000519689	370.6	0	0.999999999839099	0.9992072179435	-519977.985175198	36258	Sei_0_bud
shape120	0.782291	0.00024434	3201.65	0	0.99999999983909
scale120	7.05334	0.00176775	3990.01	0
mu121	0.222755	0.00105558	211.026	0	0.999999999478904	0.998831536007421	-490337.117552044	36290	Sg_1
shape121	0.92141	0.000430584	2139.91	0	0.999999999478875
scale121	6.30171	0.00202754	3108.06	0
mu122	0.119664	0.000340074	351.876	0	0.999999999969795	0.999766285122849	-581028.714449652	35989	Si_0
shape122	0.783769	0.000208652	3756.35	0	0.999999999969794
scale122	6.90019	0.00162963	4234.19	0
mu123	0.203844	0.000387224	526.425	0	0.999999999852686	0.999195576535597	-518795.887209798	36244	Sorbo_bud
shape123	0.742858	0.000226238	3283.52	0	0.999999999852678
scale123	7.35049	0.00198142	3709.71	0
mu124	0.226218	0.000537575	420.812	0	0.999999999671555	0.998787613170857	-491572.365495308	36257	Sp_0_bud
shape124	0.76463	0.00027981	2732.68	0	0.999999999671536
scale124	6.87927	0.00207614	3313.49	0
mu125	0.230148	0.000489861	469.822	0	0.9999999996795	0.99880446412886	-493021.856236616	36249	Sq_8_bud
shape125	0.749211	0.000267617	2799.56	0	0.999999999679483
scale125	6.73658	0.0020523	3282.46	0
mu126	0.133014	0.000403878	329.342	0	0.999999999908919	0.999523072309059	-542733.320309169	36103	Stw_0
shape126	0.784141	0.000234484	3344.11	0	0.999999999908914
scale126	6.35025	0.00156455	4058.84	0
mu127	0.141163	0.000284034	496.993	0	0.999999999967211	0.999729161657503	-577846.883330976	35965	Su_0
shape127	0.765957	0.000192384	3981.39	0	0.99999999996721
scale127	6.82064	0.00146918	4642.47	0
mu128	0.242655	0.000698578	347.356	0	0.999999999469255	0.998568101210912	-476927.577039369	36268	Sus_1_bud
shape128	0.792148	0.000353876	2238.49	0	0.999999999469226
scale128	6.21941	0.00216474	2873.06	0
mu129	0.239906	0.000700303	342.575	0	0.999999999634871	0.998849763599434	-495002.968209872	36264	Ta_0_bud
shape129	0.814161	0.000311069	2617.3	0	0.999999999634851
scale129	6.69824	0.00195967	3418.04	0
mu130	0.140453	0.000279476	502.557	0	0.999999999981085	0.999732645105628	-592917.057441493	36156	Tamm_2_bud
shape130	0.766707	0.000149225	5137.93	0	0.999999999981084
scale130	8.19303	0.00130446	6280.77	0
mu131	0.258938	0.000786283	329.319	0	0.999999999533865	0.998639825210039	-484622.43570432	36288	Tol_0_bud
shape131	0.822993	0.000336395	2446.5	0	0.999999999533839
scale131	6.8896	0.0021316	3232.12	0
mu132	0.19443	0.000511936	379.794	0	0.999999999834586	0.999201688150084	-521131.964238554	36278	Tscha_1_bud
shape132	0.791261	0.00024429	3239.03	0	0.999999999834577
scale132	7.09397	0.00173949	4078.2	0
mu133	0.226668	0.000510322	444.166	0	0.999999999630232	0.998773643150023	-491449.066289545	36268	Tu_0_bud
shape133	0.752226	0.000277016	2715.46	0	0.999999999630212
scale133	6.58315	0.00202289	3254.34	0
mu134	0.220005	0.000686609	320.422	0	0.999999999525229	0.998667088604807	-483116.780716818	36264	Ty_0_bud
shape134	0.804547	0.000334653	2404.12	0	0.999999999525203
scale134	6.35361	0.00204568	3105.87	0
mu135	0.128239	0.000461483	277.885	0	0.999999999869398	0.999486627671699	-536935.005471888	36216	Uk_1
shape135	0.808266	0.000261444	3091.54	0	0.999999999869391
scale135	5.73108	0.00150775	3801.07	0
mu136	0.198294	0.000598198	331.486	0	0.999999999730631	0.999014811197407	-506695.258802893	36252	Uk_1_bud
shape136	0.808289	0.000277233	2915.56	0	0.999999999730616
scale136	6.59046	0.00174696	3772.53	0
mu137	0.248634	0.000484312	513.376	0	0.999999999688962	0.998810986920196	-491723.074940009	36219	Uod_1_bud
shape137	0.72456	0.000258137	2806.88	0	0.999999999688945
scale137	7.26473	0.00231494	3138.19	0
mu138	0.204214	0.000777753	262.569	0	0.999999999821906	0.999246016704083	-523582.568421606	36294	Utrecht_bud
shape138	0.869075	0.00029569	2939.14	0	0.999999999821896
scale138	7.25088	0.00177903	4075.75	0
mu139	0.249494	0.000662621	376.526	0	0.999999999418258	0.998453432628839	-475077.881798443	36276	Van_0_bud
shape139	0.795059	0.000336652	2361.67	0	0.999999999418226
scale139	6.32866	0.00211116	2997.71	0
mu140	0.126259	0.00032098	393.355	0	0.999999999969768	0.999737999290025	-580686.63251497	36007	Vind_1
shape140	0.780841	0.000192594	4054.33	0	0.999999999969767
scale140	6.9379	0.00144692	4794.94	0
mu141	0.162922	0.000506072	321.935	0	0.999999999694798	0.999035148701735	-499259.754166047	36209	Wa_1
shape141	0.777508	0.000299078	2599.68	0	0.999999999694781
scale141	5.64502	0.0017696	3190	0
mu142	0.230944	0.000674446	342.421	0	0.999999999492261	0.998602024883217	-479040.548816516	36252	Westkar_4_bud
shape142	0.785452	0.000335053	2344.26	0	0.999999999492233
scale142	6.32271	0.00212697	2972.64	0
mu143	0.25794	0.000726764	354.916	0	0.999999999481889	0.998588362109134	-481724.916819221	36273	Wl_0_bud
shape143	0.815592	0.000340173	2397.58	0	0.999999999481861
scale143	6.40735	0.00203868	3142.89	0
mu144	0.176058	0.000479772	366.962	0	0.999999999833004	0.999256160563841	-524791.741418555	36245	Ws_2_bud
shape144	0.801789	0.000248656	3224.49	0	0.999999999832995
scale144	6.47108	0.00156872	4125.08	0
mu145	0.149052	0.000458448	325.124	0	0.999999999806247	0.999274238068543	-520459.329585954	36206	Wt_5
shape145	0.793691	0.000269317	2947.05	0	0.999999999806237
scale145	5.83277	0.00156035	3738.12	0
mu146	0.136329	0.000390697	348.939	0	0.999999999938063	0.999651261408179	-560149.326564853	36009	Yo_0
shape146	0.80271	0.000225965	3552.37	0	0.99999999993806
scale146	6.2343	0.00143136	4355.5	0
mu147	0.139555	0.000435432	320.499	0	0.999999999864823	0.99940296471884	-531627.44535563	36203	Zdr_1
shape147	0.792181	0.00025134	3151.83	0	0.999999999864815
scale147	5.92142	0.00151439	3910.09	0
mu148	0.184764	0.000486846	379.512	0	0.999999999742398	0.999036458834894	-505287.18943603	36243	Zdr_1_bud
shape148	0.774473	0.000269438	2874.41	0	0.999999999742384
scale148	6.30114	0.00178121	3537.57	0
mu149	0.164349	0.000390447	420.926	0	0.999999999965163	0.999698001891434	-579571.18314086	36230	Er_0
shape149	0.814421	0.000203161	4008.75	0	0.999999999965162
scale149	7.73733	0.00166179	4656.02	0
mu150	0.164284	0.000389494	421.788	0	0.999999999865339	0.999299920541821	-529153.99795727	36227	Er_0_bud
shape150	0.766242	0.000219738	3487.07	0	0.999999999865331
scale150	6.59334	0.00156036	4225.53	0

## Sheet: 3500bp
					Non-linear fits for I[R] Arabidopsis Thaliana ecotypes
							Genomic region 3500bp
	The two methods of model validation were used:
	1) Data splitting-Randomly split the data, obtain a prediction equation on one half
	of the random split and then check its predictive power (cross-validate) on the other
	sample.
	2) An estimate of the average predictive power of the equation on many other samples
	from the same population, using a formula due to Stein
Reference	J. P. Stevens, Applied Multivariate Statistics for the Social Sciences. (Routledge Academic, Fifth Edit., 2009)
	Estimate	Std. Error	t value	Pr(>|t|))	Adj.R.Square	R.Cross.val	AIC	sample.size	Sample
mu	0.142768	0.000460203	310.23	0	0.999999999897531	0.999480893287595	-501725.370094985	33659	Aa_0
shape	0.795346	0.000261509	3041.37	0	0.999999999897525
scale	6.32072	0.00165215	3825.75	0
mu1	0.13318	0.000416928	319.432	0	0.999999999918285	0.999531563723377	-507510.43781155	33671	Abd_0
shape1	0.780449	0.000241713	3228.82	0	0.99999999991828
scale1	6.38803	0.00166026	3847.61	0
mu2	0.142735	0.000341377	418.117	0	0.999999999974457	0.99972722783159	-537077.353653573	33538	Ag_0
shape2	0.768484	0.000202978	3786.04	0	0.999999999974455
scale2	8.10198	0.00189179	4282.71	0
mu3	0.161999	0.00046237	350.367	0	0.999999999921616	0.999483508590564	-505661.785759385	33638	Ag_0_bud
shape3	0.78464	0.000236782	3313.76	0	0.999999999921611
scale3	7.07782	0.00169618	4172.81	0
mu4	0.112914	0.000382969	294.839	0	0.999999999970332	0.999774270670607	-543297.364431892	33494	Ak_1
shape4	0.809528	0.000219404	3689.67	0	0.99999999997033
scale4	6.92358	0.00163524	4233.99	0
mu5	0.147996	0.000449996	328.884	0	0.999999999916054	0.999496445231427	-500576.324268932	33623	Altai_5
shape5	0.768604	0.000247856	3101.02	0	0.999999999916049
scale5	7.07336	0.00198542	3562.66	0
mu6	0.166832	0.000692096	241.053	0	0.999999999773845	0.99915718586878	-472129.701493611	33567	Amel_1
shape6	0.822491	0.000311988	2636.29	0	0.999999999773831
scale6	6.47625	0.00190726	3395.57	0
mu7	0.152425	0.000415601	366.758	0	0.99999999993729	0.999582072553125	-517695.415968031	33651	An_1
shape7	0.804211	0.000230444	3489.83	0	0.999999999937286
scale7	6.82092	0.00155458	4387.64	0
mu8	0.134693	0.000469336	286.987	0	0.999999999944473	0.999654364014269	-520112.253241415	33528	Anholt_1
shape8	0.799455	0.000225421	3546.5	0	0.99999999994447
scale8	6.8842	0.00164886	4175.13	0
mu9	-0.00221285	0.000846543	-2.61398	0.0089534	0.999999999973647	0.999604060216638	-528567.383690065	33301	Ann_1
shape9	0.832858	0.00019862	4193.23	0	0.999999999973645
scale9	12.5064	0.00195708	6390.37	0
mu10	0.130667	0.000451194	289.602	0	0.999999999890618	0.999459568374873	-497523.437399693	33653	Anz_0
shape10	0.778084	0.000250924	3100.87	0	0.999999999890611
scale10	6.46642	0.00175963	3674.88	0
mu11	0.135882	0.00043257	314.127	0	0.999999999939471	0.999619372166878	-514174.443230345	33548	Appt_1
shape11	0.782544	0.000236684	3306.27	0	0.999999999939467
scale11	6.76797	0.00178544	3790.66	0
mu12	0.0966358	0.000290807	332.302	0	0.99999999998844	0.999850374230669	-572711.699462957	33524	Ba_1
shape12	0.79405	0.00017433	4554.86	0	0.999999999988439
scale12	7.44784	0.00144043	5170.56	0
mu13	0.119338	0.000397644	300.112	0	0.999999999960483	0.999710680097583	-529318.761673998	33587	Baa_1
shape13	0.782078	0.000219558	3562.06	0	0.999999999960481
scale13	7.09768	0.00171191	4146.07	0
mu14	0.134778	0.000438949	307.047	0	0.999999999943863	0.999675057533013	-523173.275639563	33517	Benk_1
shape14	0.811193	0.000239904	3381.32	0	0.99999999994386
scale14	6.42247	0.00160562	4000	0
mu15	-0.0467901	0.00103545	-45.1883	0	0.999999999934774	0.999357080622173	-502035.66776662	33428	Bik_1
shape15	0.861855	0.000264473	3258.77	0	0.99999999993477
scale15	10.9527	0.00211005	5190.72	0
mu16	0.15513	0.000416861	372.138	0	0.999999999932814	0.999544883484092	-515558.598299329	33669	Bl_1
shape16	0.799815	0.000220266	3631.13	0	0.99999999993281
scale16	6.85156	0.0014917	4593.11	0
mu17	0.141915	0.000525925	269.838	0	0.999999999881136	0.999415910244357	-492166.873375594	33606	Bla_1
shape17	0.797697	0.000269112	2964.18	0	0.999999999881129
scale17	6.67432	0.00184103	3625.31	0
mu18	0.107612	0.000350484	307.039	0	0.999999999987212	0.999843908371004	-566288.64517467	33581	Boot_1
shape18	0.806435	0.000203605	3960.79	0	0.999999999987212
scale18	8.05716	0.00183301	4395.58	0
mu19	0.0362806	0.00108566	33.418	6.49996e-241	0.999999999991296	0.999805065130327	-582304.612664528	33717	Bor_4
shape19	0.92488	0.000180061	5136.48	0	0.999999999991295
scale19	12.8151	0.00174443	7346.29	0
mu20	0.0666429	0.000382083	174.42	0	0.999999999995809	0.999874949674633	-612326.497273222	33705	Bor_4_bud
shape20	0.847613	0.000107938	7852.76	0	0.999999999995808
scale20	9.64178	0.00087144	11064.2	0
mu21	0.187012	0.000515421	362.834	0	0.999999999799844	0.999084744040275	-473131.4271181	33662	Br_0_bud
shape21	0.769013	0.000265872	2892.41	0	0.999999999799832
scale21	6.7684	0.00191081	3542.16	0
mu22	0.114601	0.000384707	297.891	0	0.99999999997858	0.999755434779824	-553439.221195186	33654	Bs_1
shape22	0.825271	0.000171338	4816.63	0	0.999999999978579
scale22	7.80038	0.00134226	5811.37	0
mu23	0.142411	0.000541847	262.825	0	0.999999999822115	0.999320321714392	-485459.50194472	33694	Bsch_0
shape23	0.817786	0.000300596	2720.54	0	0.999999999822104
scale23	5.86031	0.0016543	3542.47	0
mu24	0.201452	0.00108841	185.087	0	0.999999999724267	0.999126947803645	-470612.520751631	33710	Bu_0
shape24	0.914826	0.000413353	2213.18	0	0.99999999972425
scale24	6.68499	0.00211635	3158.73	0
mu25	0.132726	0.000374607	354.308	0	0.999999999941136	0.99960587102577	-521161.191767329	33641	Ca_0
shape25	0.792299	0.000219338	3612.22	0	0.999999999941133
scale25	6.54481	0.00142225	4601.74	0
mu26	0.173129	0.000618163	280.07	0	0.999999999711005	0.99903726412333	-465572.67258505	33663	Cal_0
shape26	0.801067	0.000315301	2540.64	0	0.999999999710988
scale26	6.19952	0.00194055	3194.73	0
mu27	0.131809	0.000437273	301.434	0	0.999999999939976	0.999620893113172	-515885.038987592	33557	Chat_1
shape27	0.793479	0.000241053	3291.72	0	0.999999999939972
scale27	6.60837	0.00171374	3856.12	0
mu28	0.202448	0.000651481	310.751	0	0.999999999786184	0.999058718282963	-470537.86930308	33605	Chi_0
shape28	0.794112	0.000283047	2805.58	0	0.999999999786171
scale28	7.16983	0.00201038	3566.4	0
mu29	0.108403	0.000363213	298.457	0	0.999999999991189	0.999833599284094	-571476.533188806	33457	Cnt_1
shape29	0.789533	0.000157792	5003.62	0	0.999999999991189
scale29	8.85412	0.00127122	6965.09	0
mu30	0.175315	0.000491766	356.5	0	0.999999999789576	0.999153981721595	-473752.833670095	33661	Co_1_bud
shape30	0.766986	0.000276869	2770.21	0	0.999999999789564
scale30	6.34763	0.00191103	3321.58	0
mu31	0.165178	0.000480535	343.738	0	0.999999999894676	0.999409015688068	-493047.095927622	33515	Com_1
shape31	0.782978	0.000250423	3126.62	0	0.99999999989467
scale31	6.94779	0.00182219	3812.88	0
mu32	0.0547518	0.000549706	99.6019	0	0.99999999998889	0.999749657453326	-565613.211747444	33597	Cvi_0
shape32	0.79566	0.000145852	5455.25	0	0.99999999998889
scale32	9.44134	0.00125082	7548.12	0
mu33	0.143652	0.000448272	320.456	0	0.999999999919934	0.999484504601348	-505974.896366426	33653	Da_1_12
shape33	0.785888	0.000229098	3430.35	0	0.99999999991993
scale33	7.30434	0.00172451	4235.61	0
mu34	0.111525	0.000425026	262.395	0	0.99999999994501	0.999659647849175	-520363.68537324	33502	Db_1
shape34	0.799696	0.000225817	3541.35	0	0.999999999945006
scale34	6.57258	0.00156233	4206.91	0
mu35	0.113052	0.000398891	283.416	0	0.999999999977073	0.99974296772729	-539465.268905536	33427	Di_G
shape35	0.784474	0.000189945	4130	0	0.999999999977071
scale35	8.27738	0.00142846	5794.62	0
mu36	0.193655	0.000662125	292.475	0	0.999999999682862	0.998928923689801	-456154.729503306	33663	Dja_1
shape36	0.789407	0.0003383	2333.45	0	0.999999999682843
scale36	6.48086	0.00224881	2881.91	0
mu37	0.174925	0.000388304	450.484	0	0.999999999966768	0.999615477336692	-520754.201309269	33370	Ei_2
shape37	0.757548	0.000190267	3981.51	0	0.999999999966766
scale37	8.55	0.00184104	4644.12	0
mu38	0.158054	0.000502218	314.712	0	0.999999999789356	0.999197123109529	-476189.509252773	33662	El_0
shape38	0.785809	0.000288089	2727.66	0	0.999999999789343
scale38	6.08579	0.00181474	3353.54	0
mu39	0.126978	0.000377541	336.33	0	0.999999999967387	0.999710299243462	-533060.505065096	33582	Ema_1
shape39	0.776844	0.000213813	3633.29	0	0.999999999967385
scale39	7.24736	0.0017801	4071.32	0
mu40	0.185297	0.000533462	347.349	0	0.999999999719257	0.998917200291955	-461478.363056809	33667	Ema_1_bud
shape40	0.761137	0.000283768	2682.25	0	0.99999999971924
scale40	6.56119	0.00202854	3234.44	0
mu41	0.166887	0.000567009	294.328	0	0.999999999810405	0.999264187126221	-479971.309451119	33604	En_D
shape41	0.795538	0.00029376	2708.12	0	0.999999999810393
scale41	6.19712	0.00181643	3411.71	0
mu42	0.188577	0.000593154	317.922	0	0.999999999811724	0.999154868281589	-473168.318157529	33671	Es_0
shape42	0.786976	0.00029356	2680.8	0	0.999999999811713
scale42	6.9042	0.00209564	3294.56	0
mu43	0.189786	0.000583873	325.046	0	0.999999999708519	0.998982213625188	-462797.586730299	33691	Est
shape43	0.788975	0.000318871	2474.28	0	0.999999999708502
scale43	6.28415	0.00202161	3108.48	0
mu44	0.117015	0.000337307	346.908	0	0.999999999984409	0.999788404283492	-558380.918475236	33643	Et_0
shape44	0.79125	0.000153461	5156.02	0	0.999999999984408
scale44	8.03663	0.00152829	5258.56	0
mu45	0.138223	0.000395292	349.675	0	0.999999999934138	0.999559200110852	-516027.60755461	33643	Fi_0
shape45	0.791375	0.000218461	3622.5	0	0.999999999934134
scale45	6.63471	0.00146286	4535.42	0
mu46	0.165957	0.000608103	272.909	0	0.999999999862725	0.99930417420222	-485295.108966504	33668	Fr_2
shape46	0.798734	0.000272853	2927.35	0	0.999999999862717
scale46	7.20177	0.00199426	3611.26	0
mu47	0.184448	0.000611381	301.69	0	0.999999999816231	0.999133178056362	-475329.373070304	33674	Fr_2_bud
shape47	0.789418	0.000280394	2815.39	0	0.99999999981622
scale47	7.06914	0.00199917	3536.04	0
mu48	0.142566	0.000463319	307.707	0	0.999999999915487	0.999498619460188	-502453.5970297	33639	Ga_0
shape48	0.777763	0.000246502	3155.2	0	0.999999999915482
scale48	7.00257	0.00187798	3728.78	0
mu49	0.155779	0.000479916	324.596	0	0.999999999880891	0.999378055579349	-497705.241095901	33664	Gel_1
shape49	0.796529	0.000242328	3286.98	0	0.999999999880884
scale49	6.70299	0.00161148	4159.53	0
mu50	0.200094	0.000578561	345.848	0	0.999999999850553	0.99919664686324	-480387.744102453	33674	Gie_0
shape50	0.779029	0.000262162	2971.56	0	0.999999999850544
scale50	7.44834	0.00203123	3666.91	0
mu51	-0.0998419	0.000966978	-103.251	0	0.999999999904627	0.999537633630419	-527877.422471329	33723	Gifu_2
shape51	0.965838	0.000254721	3791.75	0	0.999999999904621
scale51	8.97266	0.00159589	5622.37	0
mu52	0.11023	0.000329603	334.434	0	0.999999999973734	0.99977678965717	-546986.862174665	33604	Got_7
shape52	0.796554	0.000212565	3747.35	0	0.999999999973732
scale52	6.72173	0.00158208	4248.67	0
mu53	0.101629	0.000286871	354.269	0	0.999999999983435	0.999813273877757	-560552.85886379	33560	Gr_1
shape53	0.787008	0.000171195	4597.16	0	0.999999999983434
scale53	7.44991	0.00153927	4839.91	0
mu54	0.137775	0.000407727	337.91	0	0.999999999933348	0.999606859677155	-517930.625872119	33640	Gre_0
shape54	0.794733	0.000236879	3355.01	0	0.999999999933344
scale54	6.43985	0.00154113	4178.66	0
mu55	0.102714	0.000296641	346.258	0	0.99999999999233	0.999885542715515	-591364.5751601	33601	Gu_0
shape55	0.8159	0.000152722	5342.37	0	0.99999999999233
scale55	7.59801	0.00121081	6275.17	0
mu56	0.17855	0.000533931	334.406	0	0.999999999793534	0.999150509371302	-470358.473452855	33639	Gy_0
shape56	0.766636	0.000294089	2606.82	0	0.999999999793522
scale56	6.44483	0.00208306	3093.92	0
mu57	0.200282	0.000440917	454.24	0	0.999999999847033	0.999133937213257	-479602.979451839	33665	HR_5_bud
shape57	0.756149	0.000236409	3198.47	0	0.999999999847024
scale57	7.2953	0.00198165	3681.42	0
mu58	0.148736	0.00051568	288.426	0	0.999999999858611	0.99938699742994	-490941.028070082	33677	Ha_0
shape58	0.807275	0.000286299	2819.69	0	0.999999999858603
scale58	6.14146	0.00171859	3573.54	0
mu59	0.140672	0.000496389	283.391	0	0.999999999874585	0.99941481503475	-493352.259574208	33626	Hey_1
shape59	0.795717	0.000268112	2967.86	0	0.999999999874578
scale59	6.29393	0.00171934	3660.66	0
mu60	0.142075	0.000448931	316.474	0	0.999999999855546	0.99934563726337	-485812.141760063	33643	Hs_0
shape60	0.770747	0.000273173	2821.46	0	0.999999999855537
scale60	6.23218	0.00186278	3345.63	0
mu61	0.174837	0.000554387	315.371	0	0.999999999723656	0.999040991506501	-465331.52642207	33675	In_0
shape61	0.779376	0.000309781	2515.9	0	0.99999999972364
scale61	6.22486	0.00199025	3127.68	0
mu62	0.141087	0.000414375	340.482	0	0.999999999906887	0.999485231333803	-500157.481621415	33585	Is_0
shape62	0.770799	0.000244859	3147.93	0	0.999999999906882
scale62	6.46768	0.0017572	3680.67	0
mu63	0.170017	0.000483111	351.921	0	0.999999999814899	0.999183569233783	-479065.586692377	33676	Is_0_bud
shape63	0.775979	0.000270148	2872.43	0	0.999999999814888
scale63	6.33959	0.00178535	3550.89	0
mu64	0.140195	0.000407996	343.62	0	0.99999999994592	0.999603185918159	-517615.837888277	33632	Je_0
shape64	0.773673	0.000224941	3439.44	0	0.999999999945917
scale64	7.2834	0.00179767	4051.58	0
mu65	0.148975	0.000465537	320.006	0	0.999999999873335	0.999385088036706	-492891.564642537	33625	Jm_0
shape65	0.793538	0.000265436	2989.56	0	0.999999999873327
scale65	6.23343	0.00165282	3771.38	0
mu66	0.137577	0.000355308	387.206	0	0.999999999978094	0.999762365879251	-547872.288074874	33638	Kas_1
shape66	0.790744	0.000181211	4363.68	0	0.999999999978093
scale66	7.80248	0.00168401	4633.27	0
mu67	0.140899	0.000467059	301.673	0	0.999999999888927	0.999489366612352	-498395.53259255	33542	Kelsterbach_4
shape67	0.799026	0.000259216	3082.47	0	0.999999999888921
scale67	6.14927	0.00164849	3730.24	0
mu68	0.161745	0.000560064	288.797	0	0.999999999884504	0.999430089138694	-493601.541263249	33651	Kil_0
shape68	0.804149	0.000274044	2934.38	0	0.999999999884498
scale68	7.01516	0.00198329	3537.13	0
mu69	0.128929	0.000325401	396.215	0	0.999999999971055	0.999694709433541	-536186.325583971	33532	Kin_0
shape69	0.770326	0.000181222	4250.73	0	0.999999999971053
scale69	7.53776	0.00147431	5112.74	0
mu70	0.174667	0.000453453	385.192	0	0.999999999887427	0.999339877256365	-494405.811262048	33667	Kin_0_bud
shape70	0.779004	0.000237894	3274.59	0	0.99999999988742
scale70	6.9618	0.00171834	4051.46	0
mu71	0.152806	0.000517426	295.32	0	0.999999999856313	0.999378129448266	-484749.033996097	33573	Kl_5
shape71	0.787245	0.000290202	2712.75	0	0.999999999856305
scale71	6.28875	0.00193577	3248.71	0
mu72	0.166249	0.000449653	369.728	0	0.999999999858319	0.999316305068427	-485192.541677646	33595	Knox_18
shape72	0.75902	0.000257113	2952.08	0	0.99999999985831
scale72	6.52926	0.00186477	3501.37	0
mu73	0.15229	0.00046829	325.205	0	0.999999999863672	0.99930949217305	-484150.946611377	33576	Kondara
shape73	0.76154	0.000255413	2981.6	0	0.999999999863664
scale73	6.72214	0.00191485	3510.53	0
mu74	0.119304	0.000395594	301.582	0	0.999999999929474	0.99964436176937	-518015.820704625	33593	Kro_0
shape74	0.806065	0.000248337	3245.86	0	0.99999999992947
scale74	5.8641	0.0015291	3835.01	0
mu75	0.170449	0.000512492	332.59	0	0.999999999773938	0.999152665705819	-471176.827021389	33630	Krot_0
shape75	0.77006	0.000294309	2616.5	0	0.999999999773925
scale75	6.19645	0.00195501	3169.52	0
mu76	0.163997	0.000515249	318.288	0	0.999999999832156	0.999273946933946	-480539.922437847	33631	Kyoto
shape76	0.776894	0.000279587	2778.72	0	0.999999999832146
scale76	6.27454	0.00185437	3383.64	0
mu77	0.164764	0.000416202	395.875	0	0.99999999993617	0.999567152349109	-511100.707634007	33630	Kz_9
shape77	0.76743	0.000237597	3229.97	0	0.999999999936166
scale77	7.0267	0.00183967	3819.54	0
mu78	0.172494	0.000471345	365.961	0	0.999999999813107	0.999167612128269	-475914.390021482	33666	La_0
shape78	0.764141	0.000274226	2786.54	0	0.999999999813096
scale78	6.44969	0.0019026	3389.94	0
mu79	0.0968205	0.000290083	333.769	0	0.999999999946571	0.999719529623336	-545143.64996298	33631	Lan_0
shape79	0.842679	0.000206435	4082.06	0	0.999999999946568
scale79	5.11092	0.000971959	5258.37	0
mu80	0.135307	0.000352873	383.442	0	0.999999999969171	0.999689098947891	-531138.196132577	33613	Ler_1
shape80	0.754711	0.000198455	3802.93	0	0.999999999969169
scale80	7.79177	0.00187805	4148.86	0
mu81	0.167289	0.000487988	342.813	0	0.999999999864442	0.999303572446565	-489043.559442485	33651	Li_2_1_bud
shape81	0.78366	0.00025119	3119.79	0	0.999999999864434
scale81	6.75699	0.00173668	3890.75	0
mu82	0.147936	0.00053898	274.473	0	0.999999999889066	0.999432892472155	-490935.421363283	33540	Litva
shape82	0.780151	0.000262068	2976.91	0	0.999999999889059
scale82	6.88095	0.00202448	3398.88	0
mu83	0.197368	0.000543973	362.826	0	0.999999999610117	0.998783209100475	-453159.252200927	33653	Litva_bud
shape83	0.763362	0.000312269	2444.56	0	0.999999999610094
scale83	6.0203	0.00202269	2976.38	0
mu84	0.167408	0.000490106	341.575	0	0.99999999981287	0.999164875607138	-476782.118209689	33668	Lm_2
shape84	0.770665	0.000273948	2813.18	0	0.999999999812859
scale84	6.4132	0.00185387	3459.36	0
mu85	0.131292	0.00048533	270.521	0	0.99999999986357	0.999384348293929	-488678.577698307	33547	Lp2_2
shape85	0.793824	0.000267655	2965.85	0	0.999999999863562
scale85	6.09309	0.00167528	3637.06	0
mu86	0.133998	0.000389466	344.056	0	0.999999999981175	0.999771144066201	-553921.874540927	33640	Mc_0
shape86	0.803479	0.000182692	4398	0	0.999999999981174
scale86	8.30249	0.00158881	5225.62	0
mu87	0.174948	0.00063334	276.23	0	0.999999999800737	0.999200969400249	-479252.946365119	33680	Mh_0_bud
shape87	0.824734	0.000304805	2705.78	0	0.999999999800725
scale87	6.38341	0.00177299	3600.37	0
mu88	0.19899	0.000629332	316.192	0	0.999999999831958	0.999227480118084	-485323.92654071	33692	Ms_0_bud
shape88	0.825969	0.000281525	2933.91	0	0.999999999831948
scale88	6.81082	0.00174639	3899.93	0
mu89	0.161475	0.000508113	317.792	0	0.999999999792519	0.999170129139524	-476243.190274401	33666	Mz_0_bud
shape89	0.778674	0.000279394	2787.01	0	0.999999999792506
scale89	6.13299	0.00178008	3445.35	0
mu90	0.162772	0.000448058	363.283	0	0.999999999857506	0.999316767687343	-487999.816403472	33647	Nc_1_bud
shape90	0.76962	0.000251832	3056.09	0	0.999999999857498
scale90	6.24463	0.00169115	3692.54	0
mu91	0.171284	0.000537938	318.407	0	0.999999999814964	0.999185868553933	-475751.531301378	33652	Neo_6_bud
shape91	0.771406	0.000277521	2779.64	0	0.999999999814953
scale91	6.74848	0.00201561	3348.1	0
mu92	0.164589	0.000491516	334.861	0	0.999999999909773	0.999397277596502	-502138.982655763	33676	Nok_3_bud
shape92	0.800305	0.000227189	3522.63	0	0.999999999909768
scale92	7.47313	0.00166569	4486.51	0
mu93	0.230738	0.000844968	273.073	0	0.999999999388153	0.998471217008097	-437843.166840243	33703	Np_0_bud
shape93	0.823776	0.00040391	2039.5	0	0.999999999388117
scale93	6.25798	0.00231615	2701.89	0
mu94	0.176735	0.000703456	251.238	0	0.999999999793196	0.99924154151841	-484246.837061553	33700	Nw_0_bud
shape94	0.8661	0.000317528	2727.64	0	0.999999999793184
scale94	6.21823	0.00164985	3768.96	0
mu95	0.167106	0.000449203	372.006	0	0.999999999885497	0.999338657377627	-494605.78139528	33687	Ob_0_bud
shape95	0.778708	0.000239617	3249.8	0	0.99999999988549
scale95	6.83502	0.00169045	4043.31	0
mu96	0.185156	0.000617547	299.825	0	0.999999999767997	0.999140774012948	-473323.719926375	33685	Old_1_bud
shape96	0.79911	0.000307416	2599.44	0	0.999999999767983
scale96	6.5292	0.00196741	3318.68	0
mu97	0.167533	0.000338609	494.768	0	0.999999999957606	0.999548212016133	-521778.245649046	33671	Ove_0_bud
shape97	0.747503	0.000171766	4351.88	0	0.999999999957604
scale97	8.30086	0.00163753	5069.12	0
mu98	0.157151	0.0004079	385.267	0	0.999999999935675	0.999567091312595	-509808.983394759	33513	Per_1
shape98	0.7734	0.000234281	3301.16	0	0.999999999935671
scale98	7.19861	0.00187722	3834.72	0
mu99	0.156302	0.000332406	470.213	0	0.999999999973715	0.999694131415966	-536900.871971842	33495	Pi_0
shape99	0.761896	0.000179626	4241.56	0	0.999999999973714
scale99	7.99126	0.00157533	5072.76	0
mu100	0.202467	0.000544725	371.687	0	0.999999999835826	0.999180646509086	-480693.019634049	33692	Pla_0_bud
shape100	0.787364	0.000268146	2936.33	0	0.999999999835816
scale100	6.88995	0.00186069	3702.89	0
mu101	0.130398	0.000280547	464.797	0	0.999999999980557	0.999762399908318	-562462.252555589	33642	Pna_17_bud
shape101	0.810237	0.000144986	5588.36	0	0.999999999980556
scale101	7.28845	0.00105272	6923.47	0
mu102	0.211475	0.000559357	378.069	0	0.999999999708392	0.998856067826456	-462735.960246019	33675	Pog_0_bud
shape102	0.778479	0.000277862	2801.67	0	0.999999999708374
scale102	6.80872	0.00196501	3464.98	0
mu103	0.127742	0.000321952	396.774	0	0.999999999978452	0.999738091041557	-545606.84311266	33677	Pro_0_bud
shape103	0.774856	0.000176	4402.59	0	0.999999999978451
scale103	8.29914	0.00163081	5088.96	0
mu104	0.125067	0.000419932	297.826	0	0.999999999872755	0.99950206727424	-504947.834551003	33537	Pt_0
shape104	0.807344	0.000247366	3263.77	0	0.999999999872748
scale104	5.67871	0.00139071	4083.32	0
mu105	0.165102	0.000582064	283.649	0	0.999999999785352	0.999171292000013	-472906.061463022	33664	Pu2_23
shape105	0.793687	0.000306491	2589.6	0	0.999999999785339
scale105	6.18908	0.00191743	3227.8	0
mu106	0.199366	0.000498211	400.163	0	0.999999999779719	0.998955779572181	-465698.501553093	33672	Pu2_23_bud
shape106	0.743249	0.000260257	2855.82	0	0.999999999779705
scale106	7.07938	0.00210049	3370.35	0
mu107	0.139907	0.000408439	342.539	0	0.999999999965339	0.999682012795295	-534062.252290931	33582	Pu2_7_bud
shape107	0.795635	0.000195994	4059.48	0	0.999999999965337
scale107	7.64241	0.00151806	5034.33	0
mu108	0.148706	0.000533597	278.687	0	0.999999999906968	0.99955456852323	-506192.021191159	33657	Ra_0
shape108	0.81492	0.000272586	2989.59	0	0.999999999906963
scale108	6.39469	0.00178911	3574.24	0
mu109	0.10731	0.000382097	280.845	0	0.999999999989322	0.999818685703771	-567427.133192321	33503	Ragl_1
shape109	0.784753	0.000164118	4781.65	0	0.999999999989321
scale109	8.53128	0.00128766	6625.41	0
mu110	0.27015	0.000573615	470.961	0	0.999999999642348	0.998611797031084	-449212.450905924	33686	Ragl_1_bud
shape110	0.748989	0.00028667	2612.72	0	0.999999999642327
scale110	7.56731	0.00246354	3071.72	0
mu111	0.00253175	0.000857668	2.9519	0.0031605	0.999999999965987	0.999572547382012	-522980.823696543	33360	Rd_0
shape111	0.825103	0.000207179	3982.56	0	0.999999999965985
scale111	12.0859	0.00202819	5958.94	0
mu112	0.191315	0.000537804	355.734	0	0.999999999820503	0.999138587095259	-478977.121274431	33674	Rennes_1_bud
shape112	0.784089	0.000262828	2983.27	0	0.999999999820492
scale112	6.87311	0.00184319	3728.92	0
mu113	0.162695	0.000499187	325.919	0	0.999999999814845	0.99916245006121	-476460.843950995	33652	Rld_1_bud
shape113	0.768763	0.000264991	2901.09	0	0.999999999814834
scale113	6.68746	0.00191129	3498.93	0
mu114	0.237303	0.000672854	352.681	0	0.999999999717447	0.998856199728602	-460260.259683116	33698	Rmx_A02_bud
shape114	0.7842	0.000299746	2616.21	0	0.999999999717431
scale114	7.37519	0.00224606	3283.61	0
mu115	0.202398	0.000538475	375.873	0	0.999999999801132	0.999127291226723	-475873.95789094	33689	Rome_1_bud
shape115	0.788333	0.00027732	2842.68	0	0.999999999801121
scale115	6.79181	0.00191155	3553.03	0
mu116	0.200934	0.000613806	327.357	0	0.999999999840907	0.999228957897285	-481092.774724959	33666	RRS_7
shape116	0.802467	0.000288397	2782.51	0	0.999999999840898
scale116	7.00205	0.00196516	3563.09	0
mu117	0.201105	0.00053637	374.938	0	0.9999999996999	0.998825231639684	-455255.838985548	33676	Rubezhnoe_1_bud
shape117	0.751516	0.000296811	2531.97	0	0.999999999699882
scale117	6.79667	0.00226196	3004.77	0
mu118	0.173626	0.000583861	297.376	0	0.99999999982318	0.99918731323753	-477772.641972406	33679	Se_0_bud
shape118	0.794589	0.000285518	2782.98	0	0.999999999823169
scale118	6.85635	0.00195356	3509.68	0
mu119	0.139489	0.000437689	318.694	0	0.999999999895738	0.999424976882202	-499897.618666525	33672	Seattle_0
shape119	0.792151	0.000240629	3291.99	0	0.999999999895731
scale119	6.54631	0.00158942	4118.67	0
mu120	0.208103	0.00063622	327.094	0	0.999999999812228	0.999088812323084	-473804.910289515	33695	Sei_0_bud
shape120	0.788209	0.000279688	2818.17	0	0.999999999812217
scale120	7.45609	0.00209673	3556.07	0
mu121	0.236568	0.00112665	209.975	0	0.999999999597686	0.99894940882961	-460425.945957213	33720	Sg_1
shape121	0.918739	0.000440319	2086.53	0	0.999999999597662
scale121	6.64637	0.00221012	3007.24	0
mu122	0.12078	0.000394476	306.177	0	0.999999999968781	0.999749555679425	-535909.502459524	33526	Si_0
shape122	0.792502	0.000221681	3574.96	0	0.999999999968779
scale122	7.35818	0.00185583	3964.9	0
mu123	0.214741	0.000469628	457.258	0	0.999999999869782	0.999188934147171	-482052.52758847	33689	Sorbo_bud
shape123	0.749044	0.000238374	3142.31	0	0.999999999869775
scale123	7.87151	0.0021273	3700.23	0
mu124	0.247878	0.000604429	410.103	0	0.999999999686347	0.998710492258675	-454141.919214814	33707	Sp_0_bud
shape124	0.765257	0.000292577	2615.58	0	0.999999999686328
scale124	7.29766	0.0023106	3158.33	0
mu125	0.248204	0.000625317	396.924	0	0.999999999649629	0.998675032964437	-450735.576184957	33682	Sq_8_bud
shape125	0.754794	0.000301377	2504.49	0	0.999999999649608
scale125	7.19169	0.00239741	2999.77	0
mu126	0.14616	0.000460822	317.172	0	0.999999999914543	0.999527639112837	-502810.215478946	33586	Stw_0
shape126	0.784373	0.00025055	3130.6	0	0.999999999914538
scale126	6.72296	0.00185679	3620.74	0
mu127	0.137853	0.000329398	418.499	0	0.999999999968452	0.999709875867349	-536009.428926752	33535	Su_0
shape127	0.772021	0.000192856	4003.1	0	0.99999999996845
scale127	7.28908	0.00160321	4546.57	0
mu128	0.255614	0.000766945	333.289	0	0.999999999489448	0.998505064450397	-440324.687034265	33699	Sus_1_bud
shape128	0.795493	0.000372854	2133.52	0	0.999999999489418
scale128	6.56423	0.00239494	2740.87	0
mu129	0.242185	0.000800809	302.425	0	0.999999999609328	0.99870306162114	-453643.964533111	33708	Ta_0_bud
shape129	0.820942	0.000337981	2428.96	0	0.999999999609304
scale129	7.09945	0.00222313	3193.44	0
mu130	0.153568	0.000367682	417.666	0	0.999999999977189	0.999680030636151	-541085.696830623	33637	Tamm_2_bud
shape130	0.768001	0.000160496	4785.18	0	0.999999999977187
scale130	8.67466	0.00149296	5810.36	0
mu131	0.2759	0.000857459	321.765	0	0.999999999595396	0.998642188038229	-450699.147874704	33711	Tol_0_bud
shape131	0.824153	0.000348512	2364.78	0	0.999999999595372
scale131	7.31338	0.00233881	3126.97	0
mu132	0.222484	0.00062846	354.015	0	0.999999999809692	0.999069804604336	-475301.273724243	33709	Tscha_1_bud
shape132	0.79208	0.000274118	2889.56	0	0.999999999809681
scale132	7.47869	0.00203916	3667.53	0
mu133	0.238222	0.000588182	405.014	0	0.999999999659544	0.998732323269478	-455161.946581704	33699	Tu_0_bud
shape133	0.756036	0.000288627	2619.42	0	0.999999999659524
scale133	7.02579	0.00221442	3172.74	0
mu134	0.243347	0.000768051	316.837	0	0.999999999528684	0.998567772106982	-444856.259990453	33702	Ty_0_bud
shape134	0.804209	0.000357205	2251.39	0	0.999999999528656
scale134	6.70663	0.00229869	2917.59	0
mu135	0.141408	0.000586372	241.158	0	0.99999999984943	0.99940587646977	-490400.216628186	33664	Uk_1
shape135	0.821212	0.000295636	2777.78	0	0.999999999849421
scale135	6.08949	0.00176148	3457.04	0
mu136	0.232215	0.000696847	333.237	0	0.999999999746096	0.998995677100705	-468918.963683914	33697	Uk_1_bud
shape136	0.812395	0.000302117	2689.01	0	0.999999999746081
scale136	6.99729	0.00199689	3504.1	0
mu137	0.25036	0.000543433	460.7	0	0.999999999708021	0.998726388889403	-455071.613482661	33683	Uod_1_bud
shape137	0.728722	0.000266579	2733.61	0	0.999999999708004
scale137	7.7619	0.00249957	3105.29	0
mu138	0.228995	0.000839603	272.742	0	0.999999999834026	0.999235406057071	-484968.488337548	33715	Utrecht_bud
shape138	0.870428	0.00031524	2761.16	0	0.999999999834017
scale138	7.66863	0.00199689	3840.28	0
mu139	0.270877	0.000813215	333.094	0	0.999999999402739	0.998338948645438	-436074.04466705	33702	Van_0_bud
shape139	0.796385	0.000372745	2136.54	0	0.999999999402703
scale139	6.67424	0.00243375	2742.37	0
mu140	0.126189	0.000399233	316.08	0	0.999999999962947	0.999680047171248	-529772.458920777	33525	Vind_1
shape140	0.790313	0.0002033	3887.43	0	0.999999999962945
scale140	7.40085	0.00159791	4631.57	0
mu141	0.173711	0.000605776	286.757	0	0.999999999666816	0.998918745315435	-456719.582704653	33655	Wa_1
shape141	0.788497	0.000335845	2347.8	0	0.999999999666796
scale141	5.98792	0.00204198	2932.41	0
mu142	0.235805	0.000743942	316.967	0	0.999999999484691	0.998496803890534	-440352.991421417	33694	Westkar_4_bud
shape142	0.78673	0.000360762	2180.75	0	0.99999999948466
scale142	6.66403	0.00241312	2761.58	0
mu143	0.255082	0.000827817	308.138	0	0.999999999491768	0.998505803432773	-444146.50465975	33712	Wl_0_bud
shape143	0.817725	0.000357946	2284.49	0	0.999999999491738
scale143	6.80107	0.00227618	2987.93	0
mu144	0.192619	0.000540653	356.27	0	0.999999999837462	0.999216877163305	-484561.454844829	33686	Ws_2_bud
shape144	0.798933	0.000264496	3020.58	0	0.999999999837452
scale144	6.81597	0.00176206	3868.18	0
mu145	0.155881	0.000546784	285.087	0	0.999999999808985	0.99925338538773	-480426.763474214	33674	Wt_5
shape145	0.802878	0.000296438	2708.42	0	0.999999999808973
scale145	6.19426	0.00180926	3423.64	0
mu146	0.136028	0.000486441	279.639	0	0.99999999994055	0.999628948661315	-518791.214427814	33527	Yo_0
shape146	0.813699	0.000232432	3500.8	0	0.999999999940547
scale146	6.64631	0.00153828	4320.6	0
mu147	0.147759	0.000485633	304.261	0	0.999999999870392	0.99938743672991	-491717.180757632	33673	Zdr_1
shape147	0.795717	0.000268542	2963.11	0	0.999999999870384
scale147	6.2902	0.00172324	3650.21	0
mu148	0.207782	0.000583185	356.289	0	0.999999999752076	0.998999108076911	-466799.038985033	33692	Zdr_1_bud
shape148	0.776722	0.000292567	2654.85	0	0.999999999752061
scale148	6.67203	0.0020147	3311.67	0
mu149	0.158354	0.000430467	367.866	0	0.999999999967979	0.999678605777899	-537122.073046745	33667	Er_0
shape149	0.823013	0.000197152	4174.51	0	0.999999999967977
scale149	8.28	0.00168114	4925.23	0
mu150	0.190365	0.000456881	416.662	0	0.999999999862815	0.999260388097616	-487074.320329931	33680	Er_0_bud
shape150	0.765687	0.000243442	3145.25	0	0.999999999862807
scale150	6.96314	0.00181214	3842.48	0

## Sheet: 3750bp
					Non-linear fits for I[R] Arabidopsis Thaliana ecotypes
							Genomic region 3750bp
	The two methods of model validation were used:
	1) Data splitting-Randomly split the data, obtain a prediction equation on one half
	of the random split and then check its predictive power (cross-validate) on the other
	sample.
	2) An estimate of the average predictive power of the equation on many other samples
	from the same population, using a formula due to Stein
Reference	J. P. Stevens, Applied Multivariate Statistics for the Social Sciences. (Routledge Academic, Fifth Edit., 2009)
	Estimate	Std. Error	t value	Pr(>|t|))	Adj.R.Square	R.Cross.val	AIC	sample.size	Sample
mu	0.144336	0.000523851	275.529	0	0.999999999901509	0.999465003158792	-466416.136251662	31442	Aa_0
shape	0.799557	0.000274488	2912.91	0	0.999999999901503
scale	6.70988	0.00184597	3634.88	0
mu1	0.145982	0.000438536	332.886	0	0.999999999917169	0.99948419681535	-469588.294329718	31442	Abd_0
shape1	0.783363	0.000256684	3051.86	0	0.999999999917163
scale1	6.74238	0.00180516	3735.06	0
mu2	0.15048	0.00041931	358.876	0	0.999999999975892	0.999718684499265	-500055.540861254	31347	Ag_0
shape2	0.769347	0.000200531	3836.55	0	0.999999999975891
scale2	8.5677	0.0019574	4377.09	0
mu3	0.16089	0.000521966	308.238	0	0.999999999909265	0.999414922034698	-463850.517853873	31423	Ag_0_bud
shape3	0.789424	0.000260315	3032.57	0	0.999999999909259
scale3	7.46303	0.00195628	3814.9	0
mu4	0.135593	0.000473565	286.325	0	0.999999999965376	0.999729631181953	-499441.958958955	31319	Ak_1
shape4	0.81223	0.000219095	3707.21	0	0.999999999965374
scale4	7.30178	0.00161724	4514.96	0
mu5	0.162805	0.000529854	307.265	0	0.999999999916556	0.999469883886642	-464039.564961253	31409	Altai_5
shape5	0.770969	0.000266221	2895.98	0	0.999999999916551
scale5	7.47781	0.00225682	3313.43	0
mu6	0.197569	0.000784445	251.858	0	0.999999999746006	0.999050708433827	-433978.515642636	31369	Amel_1
shape6	0.825783	0.000346816	2381.04	0	0.99999999974599
scale6	6.77301	0.00218934	3093.63	0
mu7	0.155571	0.000460919	337.523	0	0.999999999948833	0.999611058258281	-486188.392832562	31421	An_1
shape7	0.807264	0.000232178	3476.91	0	0.99999999994883
scale7	7.29329	0.00167063	4365.6	0
mu8	0.136248	0.000564329	241.433	0	0.999999999948049	0.999657021640919	-484318.940976417	31336	Anholt_1
shape8	0.802313	0.000244043	3287.59	0	0.999999999948045
scale8	7.29629	0.0018772	3886.79	0
mu9	-0.0354325	0.00102864	-34.4459	3.20262e-255	0.999999999969521	0.999552601763757	-486533.225542415	31173	Ann_1
shape9	0.850026	0.000236101	3600.27	0	0.999999999969519
scale9	13.4092	0.00232705	5762.34	0
mu10	0.148064	0.000516383	286.732	0	0.999999999899162	0.999472048741923	-463551.550720942	31442	Anz_0
shape10	0.781707	0.00028705	2723.24	0	0.999999999899155
scale10	6.82621	0.00210406	3244.3	0
mu11	0.142762	0.000549485	259.81	0	0.999999999933517	0.999586881013043	-473766.086424337	31340	Appt_1
shape11	0.787589	0.000269883	2918.26	0	0.999999999933513
scale11	7.17878	0.00221151	3246.1	0
mu12	0.105478	0.000347171	303.823	0	0.999999999986671	0.999832837663657	-527036.001582076	31338	Ba_1
shape12	0.799905	0.000199532	4008.9	0	0.99999999998667
scale12	7.92792	0.00176823	4483.54	0
mu13	0.120159	0.000477501	251.641	0	0.999999999965096	0.99970754652198	-494581.461730191	31363	Baa_1
shape13	0.790901	0.00021752	3635.99	0	0.999999999965094
scale13	7.58167	0.00178578	4245.57	0
mu14	0.125463	0.000533892	234.997	0	0.999999999940119	0.999629329600322	-483429.015086123	31325	Benk_1
shape14	0.818774	0.00024788	3303.11	0	0.999999999940115
scale14	6.79516	0.00166138	4090.08	0
mu15	-0.0847053	0.00123786	-68.429	0	0.999999999932204	0.999298655981045	-464464.513899514	31253	Bik_1
shape15	0.879276	0.000291213	3019.35	0	0.9999999999322
scale15	11.7805	0.00244399	4820.2	0
mu16	0.154237	0.000483425	319.051	0	0.999999999940207	0.999546988958184	-481305.706402688	31439	Bl_1
shape16	0.803712	0.000231807	3467.15	0	0.999999999940203
scale16	7.27189	0.00163752	4440.8	0
mu17	0.164935	0.000626733	263.165	0	0.999999999876645	0.999369521445506	-454851.756215027	31394	Bla_1
shape17	0.800571	0.000292699	2735.13	0	0.999999999876637
scale17	7.03535	0.00215278	3268.04	0
mu18	0.126727	0.000435585	290.934	0	0.999999999985719	0.999826110434706	-521946.929726374	31381	Boot_1
shape18	0.809532	0.000222078	3645.27	0	0.999999999985719
scale18	8.53576	0.00214338	3982.39	0
mu19	-0.0159793	0.00102018	-15.6632	4.36402e-55	0.999999999993963	0.999828471341357	-551517.160422713	31476	Bor_4
shape19	0.946508	0.000170167	5562.22	0	0.999999999993963
scale19	13.7755	0.00167458	8226.26	0
mu20	0.0640836	0.000455953	140.549	0	0.999999999996928	0.999884724087325	-577731.263962339	31469	Bor_4_bud
shape20	0.859901	0.000113909	7549	0	0.999999999996928
scale20	10.2694	0.000928356	11061.9	0
mu21	0.206792	0.000547845	377.464	0	0.999999999812972	0.999057757634348	-439783.3397825	31429	Br_0_bud
shape21	0.763654	0.000279764	2729.64	0	0.99999999981296
scale21	7.13063	0.00214626	3322.35	0
mu22	0.113858	0.000437367	260.327	0	0.99999999998222	0.99977383395238	-519091.50821326	31440	Bs_1
shape22	0.827277	0.000178887	4624.57	0	0.999999999982218
scale22	8.30428	0.00148489	5592.54	0
mu23	0.157074	0.000621994	252.533	0	0.99999999981177	0.999256491614752	-448194.891305853	31458	Bsch_0
shape23	0.820074	0.00032656	2511.25	0	0.999999999811758
scale23	6.16518	0.00188054	3278.41	0
mu24	0.22345	0.00118353	188.8	0	0.999999999732215	0.999107438807149	-436717.828504796	31472	Bu_0
shape24	0.913681	0.000440621	2073.62	0	0.999999999732198
scale24	7.00188	0.00238706	2933.27	0
mu25	0.143193	0.000410526	348.805	0	0.999999999951861	0.999620220268343	-489189.896487198	31424	Ca_0
shape25	0.792388	0.00021698	3651.89	0	0.999999999951858
scale25	6.97219	0.00152973	4557.79	0
mu26	0.203267	0.000751676	270.419	0	0.999999999680341	0.998884721752454	-427972.99712728	31440	Cal_0
shape26	0.811005	0.000350704	2312.5	0	0.99999999968032
scale26	6.54319	0.00216859	3017.26	0
mu27	0.134756	0.000493206	273.225	0	0.999999999942299	0.999623087374388	-479807.864302957	31366	Chat_1
shape27	0.799073	0.000262078	3048.99	0	0.999999999942296
scale27	7.00601	0.00196024	3574.06	0
mu28	0.227759	0.000736677	309.171	0	0.999999999792394	0.999028193442572	-437131.306633179	31411	Chi_0
shape28	0.792037	0.000306096	2587.54	0	0.999999999792381
scale28	7.51939	0.00230775	3258.32	0
mu29	0.109271	0.000519567	210.311	0	0.999999999989242	0.999802822271569	-524509.895070783	31294	Cnt_1
shape29	0.79861	0.000170165	4693.15	0	0.999999999989242
scale29	9.44549	0.00148362	6366.51	0
mu30	0.175058	0.000601	291.278	0	0.999999999786033	0.99908146685771	-438225.125222021	31434	Co_1_bud
shape30	0.772429	0.000298872	2584.48	0	0.999999999786019
scale30	6.70424	0.00211457	3170.5	0
mu31	0.162216	0.000575589	281.826	0	0.999999999904701	0.999401073795277	-460312.24282818	31330	Com_1
shape31	0.788614	0.000258081	3055.68	0	0.999999999904695
scale31	7.38539	0.00196886	3751.11	0
mu32	0.0291511	0.00074622	39.065	0	0.999999999987381	0.999724072988374	-520442.319459159	31373	Cvi_0
shape32	0.810537	0.000176482	4592.73	0	0.999999999987381
scale32	10.1449	0.001546	6562.05	0
mu33	0.15838	0.000519151	305.076	0	0.999999999926627	0.999478721515408	-471233.157267257	31421	Da_1_12
shape33	0.784382	0.000235906	3324.98	0	0.999999999926622
scale33	7.68381	0.00191321	4016.18	0
mu34	0.123363	0.000469038	263.013	0	0.999999999955127	0.999681023496039	-489290.038418743	31324	Db_1
shape34	0.801441	0.000237667	3372.12	0	0.999999999955124
scale34	6.97552	0.00174859	3989.22	0
mu35	0.100739	0.000715049	140.884	0	0.999999999973031	0.999708553820447	-495710.180090867	31257	Di_G
shape35	0.796478	0.000230555	3454.62	0	0.999999999973029
scale35	8.89338	0.00179136	4964.6	0
mu36	0.194244	0.000735653	264.043	0	0.999999999696697	0.998882844645966	-423613.717578233	31436	Dja_1
shape36	0.785818	0.000358964	2189.13	0	0.999999999696678
scale36	6.78931	0.0025074	2707.71	0
mu37	0.189175	0.000452548	418.022	0	0.999999999964947	0.999589411363106	-481924.557961701	31229	Ei_2
shape37	0.76268	0.000202158	3772.7	0	0.999999999964944
scale37	9.08141	0.00209847	4327.64	0
mu38	0.176715	0.000598177	295.423	0	0.99999999979656	0.999181347671052	-441975.730121516	31432	El_0
shape38	0.784649	0.000310785	2524.73	0	0.999999999796547
scale38	6.38398	0.00204846	3116.48	0
mu39	0.1312	0.000437627	299.8	0	0.999999999965919	0.999681418684725	-492626.603068215	31366	Ema_1
shape39	0.780885	0.000229462	3403.12	0	0.999999999965917
scale39	7.66729	0.00195196	3928	0
mu40	0.197345	0.000549829	358.92	0	0.999999999769089	0.998962627605442	-433049.628737836	31438	Ema_1_bud
shape40	0.756121	0.000285502	2648.39	0	0.999999999769075
scale40	6.88398	0.00218117	3156.09	0
mu41	0.157794	0.000620979	254.105	0	0.999999999805258	0.999192878033681	-443919.535541338	31399	En_D
shape41	0.801929	0.000308565	2598.9	0	0.999999999805245
scale41	6.53685	0.00199466	3277.17	0
mu42	0.192139	0.000684961	280.51	0	0.999999999814872	0.999107883092014	-438449.175563462	31440	Es_0
shape42	0.792222	0.000316772	2500.92	0	0.99999999981486
scale42	7.29827	0.00234729	3109.23	0
mu43	0.19851	0.000682169	290.999	0	0.999999999732017	0.998987369677487	-430949.581988366	31448	Est
shape43	0.791265	0.000337582	2343.92	0	0.999999999732
scale43	6.61221	0.00225294	2934.93	0
mu44	0.11902	0.000397989	299.054	0	0.99999999998567	0.999796717850447	-520628.709943313	31434	Et_0
shape44	0.795674	0.000172564	4610.9	0	0.999999999985669
scale44	8.56035	0.00177736	4816.32	0
mu45	0.143861	0.000448631	320.667	0	0.999999999938289	0.999561117494697	-480467.080246529	31430	Fi_0
shape45	0.792831	0.00023881	3319.93	0	0.999999999938285
scale45	7.01829	0.00166412	4217.41	0
mu46	0.183158	0.000698732	262.129	0	0.999999999867998	0.999260799444776	-450620.246028896	31445	Fr_2
shape46	0.801228	0.000292937	2735.15	0	0.99999999986799
scale46	7.6399	0.00223139	3423.83	0
mu47	0.183184	0.000658324	278.258	0	0.999999999840946	0.999162002036427	-444553.225596503	31448	Fr_2_bud
shape47	0.790947	0.000293002	2699.46	0	0.999999999840936
scale47	7.51257	0.00223494	3361.42	0
mu48	0.157014	0.000557217	281.782	0	0.999999999913067	0.999454804874622	-464700.473180613	31425	Ga_0
shape48	0.777791	0.000261968	2969.03	0	0.999999999913062
scale48	7.34972	0.0021051	3491.39	0
mu49	0.174452	0.000522116	334.124	0	0.999999999876696	0.99933275108138	-460186.493238942	31442	Gel_1
shape49	0.796887	0.000257072	3099.87	0	0.999999999876688
scale49	7.01738	0.00178517	3930.94	0
mu50	0.219167	0.000729524	300.425	0	0.999999999824528	0.999073292045492	-439725.14832653	31446	Gie_0
shape50	0.788864	0.000299375	2635.04	0	0.999999999824517
scale50	7.90955	0.00238567	3315.44	0
mu51	-0.137	0.0011142	-122.959	0	0.999999999913508	0.999540688063341	-492744.143311542	31476	Gifu_2
shape51	0.990473	0.00027833	3558.63	0	0.999999999913503
scale51	9.64863	0.00180642	5341.29	0
mu52	0.115197	0.000413056	278.89	0	0.999999999974385	0.999780012616319	-507886.540283711	31389	Got_7
shape52	0.797756	0.000238512	3344.72	0	0.999999999974383
scale52	7.12881	0.00188154	3788.82	0
mu53	0.113727	0.000347048	327.699	0	0.999999999986051	0.999818840429962	-525570.923392386	31365	Gr_1
shape53	0.78911	0.000179693	4391.43	0	0.99999999998605
scale53	7.92483	0.00162154	4887.22	0
mu54	0.137859	0.000466735	295.369	0	0.999999999939696	0.9996096345927	-483270.108514262	31438	Gre_0
shape54	0.795502	0.000244981	3247.2	0	0.999999999939692
scale54	6.8135	0.00174474	3905.17	0
mu55	0.0996943	0.000366045	272.355	0	0.999999999991192	0.999880179614634	-544328.327672421	31383	Gu_0
shape55	0.823082	0.000181532	4534.09	0	0.999999999991191
scale55	8.08569	0.00152488	5302.51	0
mu56	0.182474	0.000609716	299.277	0	0.999999999808913	0.999136528377453	-437952.560618474	31420	Gy_0
shape56	0.769657	0.000309737	2484.87	0	0.999999999808901
scale56	6.81492	0.00228615	2980.96	0
mu57	0.204168	0.000526574	387.729	0	0.999999999873961	0.99916523813919	-450178.142538291	31450	HR_5_bud
shape57	0.757158	0.000248854	3042.59	0	0.999999999873953
scale57	7.7516	0.00213492	3630.86	0
mu58	0.172938	0.000612083	282.54	0	0.999999999841577	0.999302011612023	-451007.363408425	31437	Ha_0
shape58	0.811211	0.000313192	2590.14	0	0.999999999841567
scale58	6.45432	0.00192868	3346.49	0
mu59	0.157898	0.000595749	265.041	0	0.999999999865533	0.999360854953423	-454971.926381482	31409	Hey_1
shape59	0.801244	0.00029943	2675.89	0	0.999999999865525
scale59	6.61868	0.00200086	3307.91	0
mu60	0.140875	0.000529891	265.857	0	0.999999999863492	0.999327358184453	-451822.913536985	31430	Hs_0
shape60	0.771789	0.000284271	2714.98	0	0.999999999863483
scale60	6.58554	0.0020438	3222.2	0
mu61	0.179205	0.000599556	298.896	0	0.999999999771114	0.999104981921649	-436827.742753854	31457	In_0
shape61	0.776662	0.000320318	2424.66	0	0.9999999997711
scale61	6.60217	0.0022346	2954.52	0
mu62	0.15627	0.00051469	303.62	0	0.999999999910532	0.999472831218892	-465000.157428498	31379	Is_0
shape62	0.772577	0.000255658	3021.91	0	0.999999999910527
scale62	6.81575	0.00190439	3578.97	0
mu63	0.175701	0.000538845	326.069	0	0.999999999816296	0.999148000150674	-444082.277264729	31454	Is_0_bud
shape63	0.77796	0.000286215	2718.1	0	0.999999999816285
scale63	6.67764	0.00198057	3371.58	0
mu64	0.144252	0.000419023	344.257	0	0.999999999957208	0.999609937759504	-486908.683455302	31415	Je_0
shape64	0.777401	0.000207512	3746.29	0	0.999999999957206
scale64	7.75925	0.0018	4310.69	0
mu65	0.173419	0.000537417	322.69	0	0.999999999858502	0.999295972883606	-453467.00426459	31421	Jm_0
shape65	0.794923	0.000286951	2770.24	0	0.999999999858493
scale65	6.49974	0.00184563	3521.7	0
mu66	0.126371	0.000400527	315.511	0	0.999999999980567	0.999768960725178	-511764.443345004	31421	Kas_1
shape66	0.793745	0.000206	3853.13	0	0.999999999980566
scale66	8.26767	0.00189862	4354.57	0
mu67	0.138946	0.000526398	263.956	0	0.999999999915713	0.999543537562528	-470702.049629086	31336	Kelsterbach_4
shape67	0.806062	0.000269516	2990.77	0	0.999999999915708
scale67	6.55446	0.00180735	3626.57	0
mu68	0.176208	0.000680572	258.911	0	0.999999999871119	0.999322469101583	-453674.285209232	31424	Kil_0
shape68	0.807406	0.000294285	2743.62	0	0.999999999871111
scale68	7.39148	0.00215358	3432.18	0
mu69	0.148397	0.000383744	386.709	0	0.99999999996971	0.999680610985099	-496269.76748543	31354	Kin_0
shape69	0.772787	0.000203341	3800.45	0	0.999999999969708
scale69	7.95515	0.00177731	4475.94	0
mu70	0.185895	0.000487433	381.375	0	0.999999999894736	0.999337029659452	-460198.30306047	31449	Kin_0_bud
shape70	0.777159	0.000245629	3163.96	0	0.999999999894729
scale70	7.31401	0.00189414	3861.39	0
mu71	0.147611	0.000591713	249.463	0	0.999999999857776	0.999365013551486	-449811.483037354	31383	Kl_5
shape71	0.788242	0.000312437	2522.88	0	0.999999999857767
scale71	6.64885	0.00228549	2909.15	0
mu72	0.174878	0.000492874	354.813	0	0.999999999860095	0.999296623954504	-450166.088995593	31395	Knox_18
shape72	0.761182	0.000275204	2765.88	0	0.999999999860086
scale72	6.8707	0.00211263	3252.21	0
mu73	0.169148	0.00053161	318.18	0	0.999999999861409	0.999266075838949	-447973.655124887	31370	Kondara
shape73	0.761113	0.000274084	2776.94	0	0.9999999998614
scale73	7.01004	0.00214415	3269.38	0
mu74	0.128693	0.000461288	278.986	0	0.999999999928931	0.999616042520998	-480338.023342471	31388	Kro_0
shape74	0.81184	0.000268238	3026.57	0	0.999999999928926
scale74	6.15992	0.001689	3647.09	0
mu75	0.180245	0.000642905	280.36	0	0.999999999763334	0.99908285349265	-434901.285065093	31423	Krot_0
shape75	0.775647	0.000324905	2387.3	0	0.999999999763319
scale75	6.52116	0.00224504	2904.7	0
mu76	0.165519	0.000611716	270.582	0	0.999999999821416	0.999204253034584	-443097.302322415	31414	Kyoto
shape76	0.784373	0.000306995	2555.01	0	0.999999999821405
scale76	6.62176	0.00211387	3132.52	0
mu77	0.141644	0.000455898	310.693	0	0.999999999943934	0.999571271598528	-477749.544742086	31405	Kz_9
shape77	0.775152	0.000240164	3227.59	0	0.999999999943931
scale77	7.51246	0.0019739	3805.89	0
mu78	0.176903	0.000497622	355.496	0	0.999999999830182	0.999148951621518	-443835.765630478	31441	La_0
shape78	0.761914	0.000277007	2750.52	0	0.999999999830171
scale78	6.80563	0.00204263	3331.8	0
mu79	0.0994238	0.000355456	279.708	0	0.999999999947262	0.999705364363398	-506314.638813645	31423	Lan_0
shape79	0.853593	0.000218694	3903.14	0	0.999999999947259
scale79	5.40081	0.00101919	5299.14	0
mu80	0.150646	0.0004343	346.87	0	0.999999999965907	0.999662224072909	-488934.649036429	31384	Ler_1
shape80	0.756894	0.000213666	3542.42	0	0.999999999965904
scale80	8.25932	0.00213987	3859.73	0
mu81	0.176197	0.00054804	321.504	0	0.999999999874197	0.999289655005925	-455344.771019031	31437	Li_2_1_bud
shape81	0.785388	0.000265638	2956.61	0	0.999999999874189
scale81	7.12971	0.00194712	3661.66	0
mu82	0.157504	0.000561702	280.405	0	0.999999999903325	0.999451260957413	-459510.261011937	31355	Litva
shape82	0.779966	0.0002733	2853.88	0	0.999999999903319
scale82	7.27885	0.00222032	3278.28	0
mu83	0.206487	0.000601325	343.386	0	0.999999999599429	0.998675153183346	-418578.649918108	31434	Litva_bud
shape83	0.76242	0.000330507	2306.82	0	0.999999999599403
scale83	6.32506	0.00224973	2811.47	0
mu84	0.182371	0.000557041	327.392	0	0.999999999791061	0.999052891443942	-438233.454873319	31443	Lm_2
shape84	0.776675	0.000297117	2614.04	0	0.999999999791047
scale84	6.78897	0.00209547	3239.83	0
mu85	0.149503	0.000555995	268.893	0	0.999999999864775	0.99936044275959	-453449.054912074	31367	Lp2_2
shape85	0.793215	0.000294821	2690.49	0	0.999999999864766
scale85	6.3496	0.00191732	3311.71	0
mu86	0.127272	0.000441573	288.223	0	0.999999999981807	0.999755650528706	-514974.565360931	31431	Mc_0
shape86	0.807732	0.000180054	4486.06	0	0.999999999981806
scale86	8.78117	0.0016097	5455.16	0
mu87	0.194014	0.00072537	267.47	0	0.999999999814252	0.999194436700296	-446262.109252501	31458	Mh_0_bud
shape87	0.822857	0.000319124	2578.48	0	0.99999999981424
scale87	6.74742	0.00198754	3394.87	0
mu88	0.190052	0.000663507	286.435	0	0.999999999857307	0.999280530055998	-454800.052645748	31461	Ms_0_bud
shape88	0.829849	0.000296291	2800.79	0	0.999999999857298
scale88	7.25369	0.0019458	3727.87	0
mu89	0.188211	0.000526208	357.674	0	0.999999999787809	0.999107379812614	-440411.955381178	31441	Mz_0_bud
shape89	0.774222	0.000294853	2625.79	0	0.999999999787795
scale89	6.40109	0.00198704	3221.42	0
mu90	0.151314	0.00050949	296.992	0	0.999999999862347	0.999285460818886	-453032.665568572	31424	Nc_1_bud
shape90	0.776974	0.00026563	2925.03	0	0.999999999862339
scale90	6.63052	0.00186658	3552.23	0
mu91	0.177892	0.000636922	279.299	0	0.999999999797728	0.99911206411201	-437941.646518702	31429	Neo_6_bud
shape91	0.774675	0.000303361	2553.64	0	0.999999999797715
scale91	7.08923	0.00229842	3084.4	0
mu92	0.180341	0.000540743	333.507	0	0.999999999913174	0.999374088329918	-465965.822412483	31442	Nok_3_bud
shape92	0.799341	0.000243523	3282.41	0	0.999999999913168
scale92	7.86361	0.0018813	4179.88	0
mu93	0.260581	0.000989326	263.393	0	0.999999999371014	0.998336991354274	-404069.535008027	31460	Np_0_bud
shape93	0.826703	0.000437717	1888.67	0	0.999999999370974
scale93	6.58769	0.00261696	2517.31	0
mu94	0.187925	0.000762393	246.494	0	0.99999999982106	0.999260954265057	-453036.617123542	31471	Nw_0_bud
shape94	0.862193	0.000330412	2609.45	0	0.999999999821049
scale94	6.53253	0.0017973	3634.64	0
mu95	0.188462	0.000478094	394.194	0	0.999999999898191	0.999351860690246	-461854.856757906	31454	Ob_0_bud
shape95	0.781031	0.000250696	3115.45	0	0.999999999898185
scale95	7.22823	0.00186248	3880.98	0
mu96	0.179191	0.000662149	270.62	0	0.999999999766707	0.999055574378824	-438142.614576852	31456	Old_1_bud
shape96	0.802836	0.000312904	2565.76	0	0.999999999766692
scale96	6.92547	0.00210359	3292.22	0
mu97	0.185858	0.000388984	477.804	0	0.999999999951353	0.999494845705683	-479136.307848009	31453	Ove_0_bud
shape97	0.749725	0.000193876	3867.03	0	0.99999999995135
scale97	8.80068	0.00192903	4562.23	0
mu98	0.168491	0.000467395	360.49	0	0.999999999939911	0.999556046122671	-475288.196534567	31346	Per_1
shape98	0.773828	0.000248684	3111.69	0	0.999999999939907
scale98	7.62367	0.00209967	3630.9	0
mu99	0.150162	0.000378305	396.933	0	0.999999999968772	0.99964047444631	-492932.492187761	31319	Pi_0
shape99	0.767822	0.000194226	3953.25	0	0.99999999996877
scale99	8.52768	0.00178103	4788.07	0
mu100	0.185923	0.000600936	309.39	0	0.999999999859702	0.999208569421974	-449723.679674571	31456	Pla_0_bud
shape100	0.791608	0.0002815	2812.11	0	0.999999999859694
scale100	7.34872	0.00206362	3561.08	0
mu101	0.12332	0.00034561	356.818	0	0.999999999981973	0.999751323710827	-524170.834273906	31437	Pna_17_bud
shape101	0.818863	0.000154756	5291.33	0	0.999999999981972
scale101	7.76943	0.00114176	6804.79	0
mu102	0.213174	0.000643442	331.303	0	0.999999999714309	0.998840452136854	-429023.718030461	31450	Pog_0_bud
shape102	0.776761	0.00029891	2598.64	0	0.999999999714291
scale102	7.18454	0.00223332	3216.98	0
mu103	0.146052	0.000460568	317.112	0	0.999999999975904	0.999714165775355	-501901.557316561	31426	Pro_0_bud
shape103	0.780012	0.000206517	3776.98	0	0.999999999975903
scale103	8.84572	0.00204291	4329.96	0
mu104	0.143318	0.000448405	319.616	0	0.999999999875929	0.999496767305142	-469354.021806487	31347	Pt_0
shape104	0.80387	0.000263295	3053.11	0	0.999999999875921
scale104	5.9402	0.00157299	3776.36	0
mu105	0.179596	0.000697229	257.585	0	0.999999999792052	0.999157936750028	-438817.643225878	31428	Pu2_23
shape105	0.79443	0.000334138	2377.55	0	0.999999999792039
scale105	6.52065	0.00220317	2959.67	0
mu106	0.22694	0.000585182	387.811	0	0.999999999762325	0.998854064690313	-428784.615600917	31448	Pu2_23_bud
shape106	0.743462	0.000288162	2580.01	0	0.99999999976231
scale106	7.48871	0.00244945	3057.3	0
mu107	0.140077	0.000492039	284.688	0	0.99999999996387	0.999668452773565	-494037.385030622	31381	Pu2_7_bud
shape107	0.7972	0.000214887	3709.85	0	0.999999999963868
scale107	8.09592	0.00178827	4527.23	0
mu108	0.145846	0.000582449	250.401	0	0.999999999910228	0.999531727404318	-470065.251240783	31435	Ra_0
shape108	0.82086	0.000291566	2815.34	0	0.999999999910223
scale108	6.7601	0.00194977	3467.12	0
mu109	0.10048	0.000451924	222.338	0	0.99999999998857	0.999808268715926	-524653.985469947	31325	Ragl_1
shape109	0.793827	0.000181957	4362.73	0	0.99999999998857
scale109	9.13234	0.00147113	6207.7	0
mu110	0.287395	0.000699928	410.607	0	0.999999999666183	0.99861123559507	-417696.563113255	31458	Ragl_1_bud
shape110	0.748697	0.000313138	2390.95	0	0.999999999666162
scale110	8.00922	0.00280613	2854.19	0
mu111	-0.0247833	0.000953726	-25.9858	2.65924e-147	0.999999999972059	0.999587267823621	-491643.452619231	31199	Rd_0
shape111	0.840669	0.000218032	3855.71	0	0.999999999972057
scale111	12.9849	0.00216246	6004.66	0
mu112	0.197145	0.000592644	332.653	0	0.999999999844984	0.99915409142068	-448105.560864729	31451	Rennes_1_bud
shape112	0.789232	0.000270741	2915.08	0	0.999999999844974
scale112	7.32436	0.00199771	3666.37	0
mu113	0.193059	0.000539053	358.144	0	0.999999999830313	0.999163294271248	-444097.521890475	31439	Rld_1_bud
shape113	0.759576	0.000278266	2729.67	0	0.999999999830302
scale113	7.00619	0.00213166	3286.73	0
mu114	0.25739	0.000773826	332.62	0	0.999999999709788	0.99874751240781	-424892.358427671	31457	Rmx_A02_bud
shape114	0.782216	0.000317636	2462.62	0	0.99999999970977
scale114	7.75546	0.00251159	3087.87	0
mu115	0.211436	0.000586106	360.747	0	0.999999999831605	0.999133765942523	-445660.335630193	31458	Rome_1_bud
shape115	0.789987	0.000285324	2768.74	0	0.999999999831594
scale115	7.23625	0.00209422	3455.34	0
mu116	0.200857	0.000704522	285.097	0	0.999999999847592	0.999213354824878	-446703.699360441	31435	RRS_7
shape116	0.807915	0.000310879	2598.81	0	0.999999999847582
scale116	7.44634	0.00221967	3354.7	0
mu117	0.214695	0.000621494	345.45	0	0.999999999699965	0.998730948699124	-421222.811843538	31450	Rubezhnoe_1_bud
shape117	0.752784	0.000312827	2406.39	0	0.999999999699945
scale117	7.13743	0.00247748	2880.92	0
mu118	0.179924	0.000697764	257.858	0	0.999999999836394	0.999176426681843	-444737.232873077	31442	Se_0_bud
shape118	0.797113	0.000301222	2646.26	0	0.999999999836384
scale118	7.24472	0.00214583	3376.19	0
mu119	0.150053	0.000557146	269.325	0	0.999999999898237	0.99940320905757	-463965.336849569	31446	Seattle_0
shape119	0.798144	0.000265029	3011.54	0	0.999999999898231
scale119	6.94306	0.00184414	3764.92	0
mu120	0.208192	0.000686832	303.119	0	0.999999999842179	0.999114818758485	-443977.365979897	31458	Sei_0_bud
shape120	0.786684	0.00027943	2815.32	0	0.999999999842169
scale120	7.88969	0.00225247	3502.68	0
mu121	0.245219	0.00131247	186.837	0	0.99999999959865	0.998879182423846	-426109.671623624	31478	Sg_1
shape121	0.926169	0.000468177	1978.25	0	0.999999999598625
scale121	7.00033	0.00246206	2843.28	0
mu122	0.120397	0.00044279	271.904	0	0.999999999975509	0.999763016601904	-505055.893347202	31348	Si_0
shape122	0.791256	0.00021715	3643.82	0	0.999999999975508
scale122	7.81863	0.00184857	4229.56	0
mu123	0.231004	0.000526155	439.043	0	0.999999999877742	0.999152225897248	-448324.180068867	31461	Sorbo_bud
shape123	0.746428	0.000247008	3021.88	0	0.999999999877734
scale123	8.31491	0.00233846	3555.71	0
mu124	0.271506	0.000681062	398.651	0	0.999999999694632	0.99867190351834	-420851.361442921	31468	Sp_0_bud
shape124	0.761734	0.00031419	2424.44	0	0.999999999694613
scale124	7.63609	0.00259987	2937.11	0
mu125	0.251329	0.000627239	400.691	0	0.999999999711564	0.998697824651417	-423080.959542515	31453	Sq_8_bud
shape125	0.749907	0.00029628	2531.08	0	0.999999999711546
scale125	7.57086	0.00253264	2989.31	0
mu126	0.14589	0.000563138	259.066	0	0.999999999916252	0.999480295168888	-466787.242506778	31382	Stw_0
shape126	0.789928	0.000257936	3062.5	0	0.999999999916247
scale126	7.1315	0.00193229	3690.69	0
mu127	0.135537	0.00040406	335.437	0	0.999999999970645	0.999711290615621	-499247.234103567	31333	Su_0
shape127	0.775197	0.000212797	3642.9	0	0.999999999970643
scale127	7.73369	0.00183098	4223.79	0
mu128	0.268319	0.000852101	314.891	0	0.999999999548996	0.998521616253783	-411125.255341576	31463	Sus_1_bud
shape128	0.791904	0.000388662	2037.51	0	0.999999999548967
scale128	6.87195	0.00262619	2616.7	0
mu129	0.256678	0.000929276	276.213	0	0.999999999597182	0.998630881363808	-418723.913478903	31465	Ta_0_bud
shape129	0.82636	0.000365224	2262.61	0	0.999999999597156
scale129	7.5059	0.00251781	2981.12	0
mu130	0.166581	0.000431249	386.277	0	0.999999999972713	0.999616565102986	-495976.705888994	31426	Tamm_2_bud
shape130	0.772993	0.000180121	4291.52	0	0.999999999972711
scale130	9.21211	0.00174801	5270.05	0
mu131	0.273651	0.00101981	268.337	0	0.999999999605457	0.998612744525212	-417697.702450928	31471	Tol_0_bud
shape131	0.830528	0.000380036	2185.39	0	0.999999999605432
scale131	7.76296	0.00266618	2911.65	0
mu132	0.236166	0.000707482	333.812	0	0.999999999823798	0.999039044955396	-442417.292235585	31467	Tscha_1_bud
shape132	0.797114	0.000286367	2783.54	0	0.999999999823787
scale132	7.93069	0.00223164	3553.75	0
mu133	0.244933	0.000645744	379.304	0	0.999999999690431	0.998751079018014	-423995.285432357	31460	Tu_0_bud
shape133	0.752374	0.000307392	2447.6	0	0.999999999690411
scale133	7.4144	0.00251039	2953.49	0
mu134	0.266846	0.000834188	319.888	0	0.999999999546634	0.998530791179061	-412688.54391978	31460	Ty_0_bud
shape134	0.802672	0.000375193	2139.36	0	0.999999999546605
scale134	7.05078	0.0025679	2745.74	0
mu135	0.149303	0.000632316	236.121	0	0.999999999850854	0.999366294445171	-454776.841509524	31453	Uk_1
shape135	0.825851	0.000318349	2594.17	0	0.999999999850845
scale135	6.40166	0.001956	3272.83	0
mu136	0.243086	0.000785275	309.555	0	0.999999999734265	0.998920418374513	-432270.979868454	31451	Uk_1_bud
shape136	0.809551	0.000324371	2495.75	0	0.999999999734249
scale136	7.31419	0.00226735	3225.88	0
mu137	0.257511	0.000578141	445.413	0	0.999999999733254	0.99870090020862	-423926.194457815	31456	Uod_1_bud
shape137	0.727817	0.00027586	2638.35	0	0.999999999733237
scale137	8.22872	0.00276579	2975.18	0
mu138	0.241048	0.000984495	244.844	0	0.999999999834542	0.999193035634868	-449294.007426925	31479	Utrecht_bud
shape138	0.879529	0.000341136	2578.23	0	0.999999999834531
scale138	8.16484	0.00225279	3624.32	0
mu139	0.309452	0.000899315	344.097	0	0.999999999395804	0.998212325161848	-402962.055579374	31470	Van_0_bud
shape139	0.792959	0.000391458	2025.66	0	0.999999999395766
scale139	6.98282	0.00269139	2594.5	0
mu140	0.142312	0.000449269	316.763	0	0.999999999964593	0.999658325913842	-492822.811681493	31347	Vind_1
shape140	0.786372	0.000212058	3708.3	0	0.99999999996459
scale140	7.79492	0.001757	4436.49	0
mu141	0.195765	0.000659466	296.854	0	0.999999999708178	0.998949903645869	-427265.547761325	31445	Wa_1
shape141	0.784203	0.0003472	2258.65	0	0.99999999970816
scale141	6.2675	0.00225002	2785.53	0
mu142	0.26397	0.000833297	316.777	0	0.999999999478245	0.998407161631347	-407010.710798751	31457	Westkar_4_bud
shape142	0.787852	0.000387081	2035.37	0	0.999999999478212
scale142	7.00955	0.00270834	2588.13	0
mu143	0.265104	0.000912295	290.59	0	0.999999999543256	0.998496796845993	-413975.988278602	31464	Wl_0_bud
shape143	0.820141	0.000379833	2159.21	0	0.999999999543226
scale143	7.16896	0.00251184	2854.06	0
mu144	0.211017	0.00061748	341.74	0	0.999999999851713	0.99923729578057	-451539.308090865	31456	Ws_2_bud
shape144	0.800496	0.0002869	2790.16	0	0.999999999851704
scale144	7.20649	0.00201187	3581.98	0
mu145	0.159556	0.000595343	268.007	0	0.999999999829378	0.999278635487079	-448510.231491035	31442	Wt_5
shape145	0.800827	0.000310408	2579.92	0	0.999999999829368
scale145	6.53745	0.00204368	3198.87	0
mu146	0.132325	0.000561208	235.785	0	0.999999999938538	0.999591948108101	-480313.390718979	31351	Yo_0
shape146	0.816173	0.000243128	3356.96	0	0.999999999938534
scale146	6.99805	0.00167613	4175.13	0
mu147	0.158407	0.000555339	285.244	0	0.999999999872513	0.999352456693031	-456052.253230794	31446	Zdr_1
shape147	0.799131	0.000287399	2780.57	0	0.999999999872505
scale147	6.67143	0.0019323	3452.58	0
mu148	0.227731	0.000666463	341.701	0	0.999999999739399	0.9989065897377	-430415.478718192	31454	Zdr_1_bud
shape148	0.775877	0.000309403	2507.66	0	0.999999999739383
scale148	7.00607	0.0022649	3093.32	0
mu149	0.159681	0.000484534	329.557	0	0.999999999973999	0.999692749069411	-504503.601297418	31451	Er_0
shape149	0.826476	0.000195314	4231.53	0	0.999999999973997
scale149	8.83719	0.00172086	5135.33	0
mu150	0.195672	0.000539484	362.702	0	0.999999999852485	0.999178851860032	-448551.445562953	31450	Er_0_bud
shape150	0.768315	0.000258645	2970.54	0	0.999999999852475
scale150	7.36405	0.00203607	3616.79	0

## Sheet: 4000bp
					Non-linear fits for I[R] Arabidopsis Thaliana ecotypes
							Genomic region 4000bp
	The two methods of model validation were used:
	1) Data splitting-Randomly split the data, obtain a prediction equation on one half
	of the random split and then check its predictive power (cross-validate) on the other
	sample.
	2) An estimate of the average predictive power of the equation on many other samples
	from the same population, using a formula due to Stein
Reference	J. P. Stevens, Applied Multivariate Statistics for the Social Sciences. (Routledge Academic, Fifth Edit., 2009)
	Estimate	Std. Error	t value	Pr(>|t|))	Adj.R.Square	R.Cross.val	AIC	sample.size	Sample
mu	0.162701	0.000596535	272.743	0	0.999999999905733	0.999462036704166	-435313.205082112	29491	Aa_0
shape	0.801756	0.000298617	2684.9	0	0.999999999905726
scale	7.03132	0.00210696	3337.18	0
mu1	0.144556	0.000567457	254.744	0	0.999999999924892	0.999512282315494	-440412.816597112	29499	Abd_0
shape1	0.791537	0.000281998	2806.89	0	0.999999999924886
scale1	7.18334	0.00215334	3335.91	0
mu2	0.156174	0.00053058	294.346	0	0.99999999997137	0.999659532852064	-461306.105905703	29431	Ag_0
shape2	0.778983	0.000211651	3680.51	0	0.999999999971368
scale2	9.12893	0.00202151	4515.89	0
mu3	0.185655	0.000600356	309.242	0	0.999999999912869	0.999390308603831	-433148.844541926	29473	Ag_0_bud
shape3	0.787296	0.000273109	2882.72	0	0.999999999912863
scale3	7.8456	0.00216025	3631.8	0
mu4	0.124133	0.000552937	224.498	0	0.999999999965312	0.999711355455596	-465657.597520207	29400	Ak_1
shape4	0.821855	0.000235841	3484.79	0	0.99999999996531
scale4	7.74921	0.00183547	4221.93	0
mu5	0.167671	0.000675405	248.252	0	0.999999999906948	0.999395925435798	-428945.691915165	29476	Altai_5
shape5	0.775689	0.000277508	2795.2	0	0.999999999906941
scale5	7.87338	0.00244633	3218.45	0
mu6	0.213576	0.000909618	234.797	0	0.999999999759686	0.999010199686656	-405621.537487988	29438	Amel_1
shape6	0.824637	0.000362922	2272.21	0	0.99999999975967
scale6	7.09386	0.0023893	2969.01	0
mu7	0.159198	0.00055381	287.46	0	0.999999999944266	0.999569274581911	-450480.487325092	29486	An_1
shape7	0.8147	0.000259706	3137.01	0	0.999999999944262
scale7	7.68569	0.00193042	3981.37	0
mu8	0.140626	0.00068762	204.511	0	0.999999999947553	0.999625763245114	-451386.036461838	29424	Anholt_1
shape8	0.812347	0.000255467	3179.85	0	0.999999999947549
scale8	7.73229	0.00201675	3834.04	0
mu9	-0.054232	0.00101593	-53.3815	0	0.999999999984749	0.999668981252747	-473919.406118634	29278	Ann_1
shape9	0.86904	0.000218231	3982.21	0	0.999999999984748
scale9	14.3051	0.00221893	6446.84	0
mu10	0.154676	0.000624432	247.707	0	0.999999999884837	0.999380320305154	-427811.309911028	29497	Anz_0
shape10	0.790631	0.000297768	2655.19	0	0.999999999884829
scale10	7.21353	0.00222284	3245.18	0
mu11	0.156222	0.000632782	246.882	0	0.999999999929949	0.999539402896843	-439986.998356294	29418	Appt_1
shape11	0.791531	0.000272978	2899.61	0	0.999999999929945
scale11	7.54242	0.00226406	3331.37	0
mu12	0.109084	0.000427496	255.17	0	0.999999999985921	0.999821865669597	-490027.489747057	29423	Ba_1
shape12	0.806105	0.000214764	3753.45	0	0.99999999998592
scale12	8.3825	0.00201392	4162.28	0
mu13	0.136343	0.000598294	227.886	0	0.999999999960921	0.999677340767334	-457983.838046028	29463	Baa_1
shape13	0.79438	0.000251654	3156.63	0	0.999999999960918
scale13	7.9895	0.00197273	4049.98	0
mu14	0.151723	0.000605141	250.724	0	0.999999999942386	0.999632359158683	-451618.147431987	29407	Benk_1
shape14	0.819966	0.000271667	3018.27	0	0.999999999942382
scale14	7.14987	0.00195429	3658.56	0
mu15	-0.104376	0.00140832	-74.1136	0	0.999999999952193	0.999391978576577	-443359.842059299	29351	Bik_1
shape15	0.901438	0.000296437	3040.91	0	0.999999999952189
scale15	12.5868	0.00263621	4774.58	0
mu16	0.168101	0.000550908	305.135	0	0.99999999993577	0.99950245305897	-446149.093537827	29497	Bl_1
shape16	0.8099	0.000253794	3191.17	0	0.999999999935766
scale16	7.65556	0.0018681	4098.05	0
mu17	0.159815	0.000749666	213.182	0	0.999999999870762	0.999319491754181	-422448.038270913	29470	Bla_1
shape17	0.806991	0.000312345	2583.66	0	0.999999999870753
scale17	7.41302	0.00235735	3144.64	0
mu18	0.138905	0.000572684	242.551	0	0.999999999985406	0.999813629279067	-485666.153980344	29431	Boot_1
shape18	0.81641	0.000216494	3771.05	0	0.999999999985405
scale18	9.02581	0.00198244	4552.88	0
mu19	-0.0158471	0.00116808	-13.5668	8.412e-42	0.999999999994814	0.999833169909393	-518981.142388233	29520	Bor_4
shape19	0.958834	0.000181209	5291.31	0	0.999999999994814
scale19	14.6955	0.0018661	7874.97	0
mu20	0.0753505	0.000515406	146.196	0	0.999999999997577	0.999890042711517	-546107.89723045	29518	Bor_4_bud
shape20	0.867261	0.000115475	7510.38	0	0.999999999997577
scale20	10.8791	0.000985899	11034.7	0
mu21	0.220855	0.000618048	357.343	0	0.99999999982008	0.998997591910603	-410723.358989583	29498	Br_0_bud
shape21	0.763584	0.000289347	2638.99	0	0.999999999820067
scale21	7.49239	0.00232676	3220.09	0
mu22	0.128986	0.00055528	232.29	0	0.999999999978052	0.99974340881376	-477252.554266622	29487	Bs_1
shape22	0.835525	0.000211529	3949.93	0	0.999999999978051
scale22	8.781	0.0018319	4793.39	0
mu23	0.165161	0.000696695	237.063	0	0.999999999812877	0.999203990240209	-417168.524399202	29509	Bsch_0
shape23	0.822333	0.000343425	2394.51	0	0.999999999812865
scale23	6.45871	0.00206739	3124.09	0
mu24	0.238176	0.00135452	175.838	0	0.999999999736958	0.999053535476218	-406767.675565347	29516	Bu_0
shape24	0.920897	0.000470152	1958.72	0	0.99999999973694
scale24	7.34647	0.00262602	2797.57	0
mu25	0.135478	0.0004654	291.101	0	0.999999999953935	0.999619258253695	-456937.399173103	29478	Ca_0
shape25	0.798404	0.000236543	3375.3	0	0.999999999953932
scale25	7.37739	0.00174979	4216.16	0
mu26	0.221309	0.000845933	261.615	0	0.999999999688038	0.998852822845586	-399207.860891942	29497	Cal_0
shape26	0.812268	0.000370819	2190.47	0	0.999999999688017
scale26	6.82912	0.00239591	2850.32	0
mu27	0.147258	0.000585313	251.589	0	0.99999999994417	0.999608180608353	-448072.909882314	29434	Chat_1
shape27	0.799205	0.000268995	2971.08	0	0.999999999944167
scale27	7.36761	0.00209631	3514.57	0
mu28	0.225635	0.000838787	269.001	0	0.999999999789266	0.998963984426837	-406465.285331253	29462	Chi_0
shape28	0.799321	0.000325394	2456.47	0	0.999999999789252
scale28	7.91611	0.00253466	3123.14	0
mu29	0.118291	0.000740257	159.797	0	0.99999999998703	0.999778110395672	-483916.129285132	29387	Cnt_1
shape29	0.806297	0.000197522	4082.07	0	0.999999999987029
scale29	10.0357	0.00171588	5848.75	0
mu30	0.201479	0.000723448	278.499	0	0.999999999736845	0.998927099919113	-401867.55996505	29501	Co_1_bud
shape30	0.778586	0.000342387	2274	0	0.999999999736827
scale30	7.04028	0.00250261	2813.18	0
mu31	0.174347	0.000620173	281.126	0	0.999999999904672	0.999356877145779	-428945.170761879	29419	Com_1
shape31	0.790906	0.000272651	2900.8	0	0.999999999904666
scale31	7.78349	0.00216163	3600.76	0
mu32	0.0424919	0.00116324	36.5288	9.31996e-286	0.999999999986295	0.999727254105799	-483084.573068586	29455	Cvi_0
shape32	0.825822	0.000212286	3890.13	0	0.999999999986294
scale32	10.791	0.00212651	5074.51	0
mu33	0.183238	0.000638414	287.021	0	0.999999999908992	0.99937868480074	-432484.7480951	29476	Da_1_12
shape33	0.793821	0.000271104	2928.1	0	0.999999999908986
scale33	8.0894	0.00222156	3641.32	0
mu34	0.118337	0.000569432	207.817	0	0.99999999994594	0.999631838917293	-450769.907390327	29416	Db_1
shape34	0.810754	0.000262775	3085.35	0	0.999999999945937
scale34	7.33686	0.00198748	3691.54	0
mu35	0.131829	0.000788799	167.127	0	0.999999999968726	0.99967405846279	-457855.567388235	29349	Di_G
shape35	0.799594	0.000236484	3381.17	0	0.999999999968724
scale35	9.3933	0.00209662	4480.21	0
mu36	0.232752	0.000844628	275.567	0	0.999999999685168	0.998762218248867	-393049.675802743	29494	Dja_1
shape36	0.786886	0.000377713	2083.29	0	0.999999999685146
scale36	7.09644	0.00272399	2605.16	0
mu37	0.206978	0.000488992	423.274	0	0.99999999996155	0.999540880521292	-446695.452943307	29334	Ei_2
shape37	0.769369	0.000218063	3528.19	0	0.999999999961547
scale37	9.65067	0.0023617	4086.32	0
mu38	0.187642	0.000648545	289.328	0	0.999999999793053	0.999114217278205	-410798.277640554	29490	El_0
shape38	0.789271	0.000330893	2385.27	0	0.999999999793039
scale38	6.72535	0.00225838	2977.95	0
mu39	0.13191	0.000516227	255.527	0	0.999999999963362	0.999653573802573	-457076.964040238	29436	Ema_1
shape39	0.789099	0.000230743	3419.82	0	0.999999999963359
scale39	8.12816	0.00199414	4076.02	0
mu40	0.224836	0.000633808	354.739	0	0.999999999760443	0.998888472130794	-402136.977032075	29501	Ema_1_bud
shape40	0.756851	0.000305008	2481.41	0	0.999999999760426
scale40	7.21955	0.00242781	2973.69	0
mu41	0.190437	0.00075496	252.248	0	0.999999999782973	0.999097491847832	-410233.09382399	29461	En_D
shape41	0.803605	0.00033475	2400.61	0	0.999999999782958
scale41	6.81186	0.00225729	3017.71	0
mu42	0.207217	0.000824572	251.303	0	0.999999999809916	0.999052110856787	-407487.712616308	29501	Es_0
shape42	0.7973	0.000346537	2300.77	0	0.999999999809903
scale42	7.67388	0.00263955	2907.26	0
mu43	0.219399	0.000818262	268.128	0	0.999999999669159	0.998801276125064	-394790.828374511	29504	Est
shape43	0.797448	0.000379941	2098.87	0	0.999999999669137
scale43	6.91473	0.00260224	2657.22	0
mu44	0.136863	0.000491351	278.545	0	0.999999999983395	0.999781276539937	-480796.004705634	29489	Et_0
shape44	0.802183	0.00022859	3509.27	0	0.999999999983394
scale44	9.03905	0.00233229	3875.61	0
mu45	0.150972	0.000486315	310.44	0	0.999999999938184	0.999535022530637	-447295.279680817	29483	Fi_0
shape45	0.798235	0.000249668	3197.19	0	0.99999999993818
scale45	7.39547	0.00184762	4002.69	0
mu46	0.198127	0.000807793	245.27	0	0.999999999874794	0.99925353153238	-421018.422338931	29501	Fr_2
shape46	0.802363	0.000304817	2632.28	0	0.999999999874785
scale46	8.01797	0.0024669	3250.22	0
mu47	0.212245	0.000768426	276.208	0	0.999999999817067	0.999018324822345	-409623.671498812	29507	Fr_2_bud
shape47	0.79494	0.000316418	2512.31	0	0.999999999817055
scale47	7.83752	0.00247738	3163.64	0
mu48	0.155756	0.000640265	243.269	0	0.999999999919868	0.999463105019774	-435162.654570437	29484	Ga_0
shape48	0.781761	0.000271186	2882.75	0	0.999999999919863
scale48	7.79257	0.00231736	3362.7	0
mu49	0.174633	0.000631657	276.468	0	0.999999999859211	0.999231461400427	-424638.235636759	29489	Gel_1
shape49	0.804342	0.000280929	2863.15	0	0.999999999859201
scale49	7.42101	0.00203375	3648.93	0
mu50	0.231335	0.000823574	280.892	0	0.999999999835577	0.999042890870825	-411039.572630877	29498	Gie_0
shape50	0.78928	0.000318379	2479.05	0	0.999999999835566
scale50	8.33655	0.00265344	3141.78	0
mu51	-0.170406	0.00139127	-122.482	0	0.99999999989431	0.999467922694157	-453404.34602699	29525	Gifu_2
shape51	1.00784	0.00032128	3136.96	0	0.999999999894303
scale51	10.3266	0.00217145	4755.6	0
mu52	0.119124	0.000514765	231.414	0	0.999999999972352	0.999747805587251	-471566.051436391	29463	Got_7
shape52	0.80658	0.000235557	3424.15	0	0.99999999997235
scale52	7.50227	0.00181943	4123.43	0
mu53	0.120279	0.000445931	269.725	0	0.999999999980789	0.999782153899981	-480771.759723267	29446	Gr_1
shape53	0.797876	0.00022572	3534.81	0	0.999999999980788
scale53	8.39231	0.00212676	3946.04	0
mu54	0.158306	0.00047846	330.866	0	0.99999999994217	0.999594290746453	-451389.879969984	29487	Gre_0
shape54	0.796702	0.000259862	3065.86	0	0.999999999942166
scale54	7.15788	0.0018806	3806.16	0
mu55	0.114019	0.000436785	261.042	0	0.999999999991271	0.999875747427258	-508083.788695924	29467	Gu_0
shape55	0.826969	0.0001834	4509.11	0	0.99999999999127
scale55	8.54333	0.00156195	5469.66	0
mu56	0.191258	0.000689122	277.538	0	0.999999999788891	0.999023447406128	-404599.097908348	29474	Gy_0
shape56	0.776421	0.000337711	2299.07	0	0.999999999788876
scale56	7.15701	0.00256174	2793.8	0
mu57	0.212515	0.000562254	377.969	0	0.999999999886816	0.999192470869742	-422168.943148704	29501	HR_5_bud
shape57	0.757337	0.000261871	2892.02	0	0.999999999886809
scale57	8.19402	0.00236661	3462.35	0
mu58	0.173263	0.000687167	252.141	0	0.999999999856177	0.999293872001307	-422966.751849354	29502	Ha_0
shape58	0.813734	0.000323544	2515.07	0	0.999999999856167
scale58	6.79617	0.00209279	3247.42	0
mu59	0.168479	0.000685128	245.909	0	0.999999999863096	0.999310571228553	-423404.273534927	29481	Hey_1
shape59	0.807001	0.000313589	2573.44	0	0.999999999863087
scale59	6.94433	0.0021524	3226.32	0
mu60	0.154526	0.000605233	255.316	0	0.999999999850972	0.999254709482563	-417996.062537173	29482	Hs_0
shape60	0.778503	0.000306307	2541.58	0	0.999999999850962
scale60	6.91333	0.00228178	3029.79	0
mu61	0.192532	0.000719577	267.562	0	0.9999999997177	0.99886946288249	-400230.925314157	29509	In_0
shape61	0.787915	0.00034797	2264.32	0	0.999999999717681
scale61	6.9113	0.00242056	2855.25	0
mu62	0.143791	0.000569462	252.502	0	0.999999999908977	0.999423425725279	-432580.24450749	29445	Is_0
shape62	0.781811	0.000267768	2919.74	0	0.999999999908971
scale62	7.25787	0.00208242	3485.31	0
mu63	0.190913	0.000637047	299.685	0	0.99999999982121	0.999111055620194	-413925.311155999	29498	Is_0_bud
shape63	0.78152	0.000301922	2588.48	0	0.999999999821198
scale63	7.05438	0.00220908	3193.35	0
mu64	0.156071	0.000520289	299.97	0	0.999999999954163	0.999599401233547	-451911.745390849	29481	Je_0
shape64	0.780911	0.000247654	3153.23	0	0.99999999995416
scale64	8.17391	0.00229176	3566.65	0
mu65	0.181912	0.000630235	288.641	0	0.999999999859822	0.999267947833309	-422443.778188635	29480	Jm_0
shape65	0.796526	0.000303755	2622.27	0	0.999999999859812
scale65	6.83691	0.00206135	3316.71	0
mu66	0.137416	0.000538213	255.318	0	0.999999999978381	0.99974798802847	-473978.260714289	29481	Kas_1
shape66	0.802392	0.000228006	3519.17	0	0.99999999997838
scale66	8.77815	0.00207301	4234.51	0
mu67	0.149601	0.000647629	230.998	0	0.999999999898918	0.999463109974204	-433370.741681876	29417	Kelsterbach_4
shape67	0.810365	0.000294486	2751.79	0	0.999999999898911
scale67	6.86231	0.00202584	3387.39	0
mu68	0.208276	0.00080701	258.083	0	0.999999999856601	0.999251963288908	-419436.847079559	29489	Kil_0
shape68	0.810228	0.00032376	2502.56	0	0.999999999856591
scale68	7.69308	0.00244586	3145.34	0
mu69	0.156762	0.000497747	314.942	0	0.999999999963556	0.999622656026328	-457086.113301974	29435	Kin_0
shape69	0.775599	0.000219398	3535.13	0	0.999999999963554
scale69	8.36038	0.00200932	4160.81	0
mu70	0.195	0.000620017	314.507	0	0.999999999878114	0.999256177220888	-423967.486872548	29499	Kin_0_bud
shape70	0.78341	0.000281601	2781.99	0	0.999999999878106
scale70	7.71201	0.00224862	3429.66	0
mu71	0.159725	0.000627086	254.71	0	0.999999999860044	0.999299277038066	-419575.698587149	29466	Kl_5
shape71	0.789748	0.000305631	2583.99	0	0.999999999860035
scale71	6.9783	0.00223314	3124.88	0
mu72	0.178113	0.000571139	311.856	0	0.99999999985449	0.999243350498815	-418161.449108738	29466	Knox_18
shape72	0.764301	0.000292969	2608.81	0	0.99999999985448
scale72	7.21651	0.00234021	3083.7	0
mu73	0.180061	0.000652122	276.115	0	0.999999999850098	0.999174082660304	-415108.809689989	29457	Kondara
shape73	0.763449	0.000292131	2613.38	0	0.999999999850088
scale73	7.39598	0.00237839	3109.66	0
mu74	0.113919	0.000557938	204.178	0	0.999999999931847	0.999613392248187	-448925.06106433	29464	Kro_0
shape74	0.815941	0.000271225	3008.36	0	0.999999999931842
scale74	6.48345	0.00183651	3530.31	0
mu75	0.186364	0.000733454	254.091	0	0.999999999743233	0.998971817952283	-402248.202949741	29472	Krot_0
shape75	0.786588	0.000345643	2275.72	0	0.999999999743215
scale75	6.88236	0.00243606	2825.21	0
mu76	0.188381	0.000660141	285.364	0	0.999999999811694	0.999149179793837	-411010.160339994	29470	Kyoto
shape76	0.781322	0.000326421	2393.6	0	0.999999999811682
scale76	6.85666	0.00239105	2867.64	0
mu77	0.164308	0.000566145	290.222	0	0.999999999936523	0.999531015093752	-441434.741227314	29481	Kz_9
shape77	0.778872	0.000273353	2849.33	0	0.999999999936519
scale77	7.89939	0.00239806	3294.08	0
mu78	0.192783	0.000627141	307.4	0	0.999999999812183	0.999036755295532	-410093.824643157	29497	La_0
shape78	0.767573	0.000303498	2529.09	0	0.999999999812171
scale78	7.17366	0.00231204	3102.74	0
mu79	0.0909298	0.000380817	238.776	0	0.999999999960088	0.999737501106361	-480002.024432663	29482	Lan_0
shape79	0.856337	0.000219281	3905.21	0	0.999999999960085
scale79	5.71208	0.00108908	5244.88	0
mu80	0.136334	0.000491719	277.26	0	0.999999999964761	0.999630969065154	-454489.405660369	29449	Ler_1
shape80	0.763618	0.000218008	3502.71	0	0.999999999964758
scale80	8.78787	0.00225924	3889.74	0
mu81	0.195782	0.000620649	315.447	0	0.999999999871038	0.999252777911783	-423220.704343736	29491	Li_2_1_bud
shape81	0.7852	0.000284403	2760.87	0	0.99999999987103
scale81	7.50489	0.00218914	3428.23	0
mu82	0.172062	0.000714226	240.907	0	0.999999999885078	0.999330668343005	-422920.544807201	29424	Litva
shape82	0.790568	0.000303229	2607.17	0	0.99999999988507
scale82	7.68309	0.00246388	3118.29	0
mu83	0.218208	0.000715841	304.827	0	0.999999999568694	0.998541159380499	-387256.119041666	29494	Litva_bud
shape83	0.763396	0.000358581	2128.93	0	0.999999999568665
scale83	6.60388	0.00252957	2610.67	0
mu84	0.208116	0.000634144	328.184	0	0.999999999795087	0.999002337750863	-408301.649930859	29497	Lm_2
shape84	0.774142	0.000316758	2443.95	0	0.999999999795073
scale84	7.08768	0.00234592	3021.28	0
mu85	0.150841	0.000655053	230.273	0	0.999999999870056	0.999332990245585	-423238.979610825	29427	Lp2_2
shape85	0.802213	0.000309949	2588.21	0	0.999999999870047
scale85	6.71615	0.00208537	3220.6	0
mu86	0.154496	0.000585244	263.986	0	0.999999999977733	0.999727546313449	-474207.72202402	29494	Mc_0
shape86	0.809083	0.000203257	3980.58	0	0.999999999977731
scale86	9.15818	0.0019791	4627.44	0
mu87	0.200642	0.000807585	248.447	0	0.999999999802035	0.999105766812908	-413214.173336685	29504	Mh_0_bud
shape87	0.827781	0.0003454	2396.59	0	0.999999999802022
scale87	7.07725	0.00221461	3195.71	0
mu88	0.212273	0.000732923	289.625	0	0.999999999859736	0.999229109138209	-423796.089841676	29516	Ms_0_bud
shape88	0.828749	0.000312578	2651.34	0	0.999999999859727
scale88	7.54926	0.0021317	3541.42	0
mu89	0.186301	0.000609375	305.725	0	0.999999999793384	0.999041566548303	-410675.77165746	29493	Mz_0_bud
shape89	0.780533	0.000306857	2543.64	0	0.99999999979337
scale89	6.76519	0.00215606	3137.75	0
mu90	0.178877	0.000594541	300.866	0	0.999999999857493	0.999253839368387	-420905.617469727	29483	Nc_1_bud
shape90	0.773867	0.00029107	2658.69	0	0.999999999857483
scale90	6.91134	0.00214253	3225.78	0
mu91	0.183151	0.000714703	256.261	0	0.99999999979108	0.999049823248166	-406616.879720448	29496	Neo_6_bud
shape91	0.77734	0.000324942	2392.24	0	0.999999999791066
scale91	7.44409	0.00257496	2890.95	0
mu92	0.20437	0.000623762	327.641	0	0.999999999914345	0.999367728289872	-434427.855835635	29503	Nok_3_bud
shape92	0.799194	0.000264588	3020.52	0	0.99999999991434
scale92	8.25994	0.00214034	3859.17	0
mu93	0.262406	0.00107956	243.067	0	0.99999999943338	0.998337360671213	-378912.095328379	29512	Np_0_bud
shape93	0.828429	0.000453021	1828.68	0	0.999999999433342
scale93	6.91731	0.00282799	2446.02	0
mu94	0.200507	0.00089383	224.323	0	0.999999999800837	0.999173385544717	-418496.446537236	29518	Nw_0_bud
shape94	0.873752	0.000365148	2392.87	0	0.999999999800823
scale94	6.86367	0.00206645	3321.47	0
mu95	0.206067	0.000554854	371.39	0	0.999999999906443	0.999350136819179	-432452.273329115	29511	Ob_0_bud
shape95	0.780675	0.000266301	2931.55	0	0.999999999906437
scale95	7.62773	0.0020763	3673.71	0
mu96	0.22177	0.000795775	278.684	0	0.999999999758329	0.999008629179919	-406558.002773758	29502	Old_1_bud
shape96	0.801624	0.000348742	2298.62	0	0.999999999758313
scale96	7.21445	0.00243408	2963.93	0
mu97	0.203002	0.000462969	438.478	0	0.999999999952494	0.999462963301852	-446800.26579942	29502	Ove_0_bud
shape97	0.753155	0.000204636	3680.46	0	0.999999999952491
scale97	9.30445	0.00214804	4331.6	0
mu98	0.180659	0.000511541	353.167	0	0.999999999946225	0.99957056918214	-445904.921165075	29412	Per_1
shape98	0.773663	0.000258757	2989.92	0	0.999999999946221
scale98	8.00376	0.00228366	3504.8	0
mu99	0.176834	0.000466675	378.923	0	0.99999999996526	0.999608968209866	-456443.784660334	29409	Pi_0
shape99	0.772044	0.000216199	3570.98	0	0.999999999965257
scale99	8.96045	0.00209108	4285.09	0
mu100	0.210165	0.000718396	292.548	0	0.999999999837646	0.999094003554728	-414338.471905657	29508	Pla_0_bud
shape100	0.794629	0.000309897	2564.17	0	0.999999999837635
scale100	7.68296	0.00235107	3267.86	0
mu101	0.130679	0.00037577	347.762	0	0.999999999984008	0.99974940531498	-491996.422524098	29488	Pna_17_bud
shape101	0.818092	0.000160992	5081.57	0	0.999999999984007
scale101	8.19106	0.00122895	6665.09	0
mu102	0.233317	0.000634785	367.553	0	0.999999999741823	0.998820702579643	-402190.174381834	29501	Pog_0_bud
shape102	0.772977	0.000298144	2592.63	0	0.999999999741805
scale102	7.50382	0.00236528	3172.49	0
mu103	0.153646	0.000530593	289.574	0	0.999999999976249	0.999711512628296	-468035.805039909	29486	Pro_0_bud
shape103	0.781447	0.000215669	3623.36	0	0.999999999976247
scale103	9.36409	0.00228397	4099.92	0
mu104	0.142436	0.000542053	262.771	0	0.999999999851128	0.999396535533592	-432024.255363351	29424	Pt_0
shape104	0.809602	0.000287599	2815.04	0	0.999999999851118
scale104	6.20824	0.00172756	3593.64	0
mu105	0.189501	0.00073953	256.245	0	0.999999999785786	0.999082376730801	-407561.03685605	29489	Pu2_23
shape105	0.802511	0.000355571	2256.97	0	0.999999999785772
scale105	6.86277	0.00243468	2818.76	0
mu106	0.250942	0.000657814	381.479	0	0.999999999772751	0.998786204867081	-400128.590756743	29502	Pu2_23_bud
shape106	0.741902	0.000300178	2471.54	0	0.999999999772736
scale106	7.85507	0.00267923	2931.84	0
mu107	0.162026	0.000578751	279.958	0	0.999999999959697	0.999614574518969	-457219.164758276	29454	Pu2_7_bud
shape107	0.803252	0.000229207	3504.48	0	0.999999999959695
scale107	8.50992	0.00196064	4340.38	0
mu108	0.163252	0.00071786	227.415	0	0.999999999890444	0.999427153489738	-431905.903930992	29483	Ra_0
shape108	0.824227	0.000313817	2626.46	0	0.999999999890437
scale108	7.08189	0.00213789	3312.56	0
mu109	0.11065	0.000633161	174.757	0	0.999999999986107	0.999768963253296	-483587.104617307	29411	Ragl_1
shape109	0.800238	0.000198044	4040.72	0	0.999999999986106
scale109	9.68046	0.00168456	5746.57	0
mu110	0.312391	0.000790892	394.985	0	0.99999999968802	0.99857109499304	-390417.431334939	29509	Ragl_1_bud
shape110	0.744204	0.000326179	2281.58	0	0.999999999687999
scale110	8.42585	0.00310637	2712.44	0
mu111	-0.0396348	0.000951889	-41.638	0	0.99999999998259	0.999654056600876	-472287.018150866	29298	Rd_0
shape111	0.854275	0.000215214	3969.42	0	0.999999999982588
scale111	13.8481	0.00214247	6463.65	0
mu112	0.217058	0.000679787	319.303	0	0.999999999825863	0.999063447309902	-413742.191464872	29502	Rennes_1_bud
shape112	0.786219	0.000297046	2646.79	0	0.999999999825851
scale112	7.66967	0.00230779	3323.38	0
mu113	0.205412	0.000589904	348.212	0	0.999999999849049	0.999144263694942	-416668.795311386	29490	Rld_1_bud
shape113	0.763813	0.000286512	2665.9	0	0.999999999849039
scale113	7.38419	0.002273	3248.65	0
mu114	0.270653	0.000893259	302.995	0	0.999999999693053	0.998654854519837	-393719.143618829	29505	Rmx_A02_bud
shape114	0.789635	0.000347392	2273.04	0	0.999999999693032
scale114	8.19387	0.00285175	2873.28	0
mu115	0.224387	0.000678727	330.6	0	0.999999999834105	0.999084231889658	-415415.341159841	29515	Rome_1_bud
shape115	0.793717	0.000298183	2661.84	0	0.999999999834094
scale115	7.60472	0.00225638	3370.32	0
mu116	0.232537	0.0008258	281.59	0	0.999999999834894	0.999104532971205	-413563.239496434	29496	RRS_7
shape116	0.813114	0.000330786	2458.13	0	0.999999999834883
scale116	7.80279	0.00243465	3204.9	0
mu117	0.246641	0.000699545	352.574	0	0.999999999702954	0.998672336982906	-392077.816736579	29499	Rubezhnoe_1_bud
shape117	0.749857	0.00033661	2227.68	0	0.999999999702934
scale117	7.49618	0.00282096	2657.31	0
mu118	0.21524	0.000827736	260.034	0	0.99999999979045	0.999027814464386	-406393.106818077	29487	Se_0_bud
shape118	0.800996	0.000352116	2274.81	0	0.999999999790436
scale118	7.52627	0.00262623	2865.81	0
mu119	0.18054	0.000590753	305.609	0	0.999999999888756	0.999338953342068	-429249.379816877	29499	Seattle_0
shape119	0.79635	0.000289271	2752.96	0	0.999999999888749
scale119	7.23239	0.00208138	3474.8	0
mu120	0.237119	0.00079163	299.533	0	0.999999999819933	0.998993056212778	-409303.799947224	29511	Sei_0_bud
shape120	0.78829	0.000311114	2533.76	0	0.999999999819921
scale120	8.27421	0.00258645	3199.06	0
mu121	0.275485	0.00150631	182.888	0	0.999999999599322	0.998813004565885	-396527.342381017	29523	Sg_1
shape121	0.930829	0.000512728	1815.44	0	0.999999999599295
scale121	7.31822	0.00280511	2608.89	0
mu122	0.136207	0.000581217	234.347	0	0.999999999968753	0.999726414515564	-463614.535340358	29416	Si_0
shape122	0.805054	0.000258528	3113.99	0	0.999999999968751
scale122	8.28771	0.00236528	3503.91	0
mu123	0.24563	0.00058965	416.569	0	0.999999999879675	0.999140697761176	-417569.549877184	29508	Sorbo_bud
shape123	0.751167	0.000266167	2822.16	0	0.999999999879667
scale123	8.79455	0.0026179	3359.38	0
mu124	0.301932	0.000817623	369.279	0	0.999999999668526	0.998541527656225	-389086.52265398	29516	Sp_0_bud
shape124	0.762754	0.000345433	2208.11	0	0.999999999668504
scale124	8.0309	0.00298522	2690.22	0
mu125	0.278446	0.000712301	390.911	0	0.999999999735218	0.998694679023598	-396095.64204083	29502	Sq_8_bud
shape125	0.748052	0.000315409	2371.69	0	0.9999999997352
scale125	7.98278	0.00282652	2824.24	0
mu126	0.16003	0.000659661	242.595	0	0.99999999990566	0.99943757163476	-431308.258229917	29443	Stw_0
shape126	0.798422	0.000288493	2767.56	0	0.999999999905653
scale126	7.48574	0.00225565	3318.66	0
mu127	0.149021	0.000456664	326.324	0	0.999999999970525	0.999705974215582	-465509.119634335	29419	Su_0
shape127	0.778519	0.000228859	3401.74	0	0.999999999970523
scale127	8.18079	0.00217223	3766.08	0
mu128	0.286144	0.000948981	301.527	0	0.999999999524795	0.998355170272183	-380679.209771452	29513	Sus_1_bud
shape128	0.799503	0.000417723	1913.96	0	0.999999999524762
scale128	7.25539	0.00292366	2481.61	0
mu129	0.307925	0.00100697	305.794	0	0.999999999623324	0.998625264675878	-391379.135138556	29511	Ta_0_bud
shape129	0.819201	0.000387861	2112.1	0	0.999999999623299
scale129	7.81238	0.00282407	2766.36	0
mu130	0.183422	0.000483573	379.306	0	0.999999999973272	0.999587938092712	-462577.699714103	29482	Tamm_2_bud
shape130	0.772644	0.000185262	4170.55	0	0.99999999997327
scale130	9.7188	0.0019056	5100.12	0
mu131	0.312307	0.0011131	280.574	0	0.999999999601998	0.998497757282107	-388242.192022241	29522	Tol_0_bud
shape131	0.829416	0.000399633	2075.44	0	0.999999999601971
scale131	8.13947	0.00294216	2766.49	0
mu132	0.243767	0.000792246	307.691	0	0.999999999814096	0.998967673268674	-409973.668130757	29514	Tscha_1_bud
shape132	0.798937	0.000303468	2632.69	0	0.999999999814084
scale132	8.33498	0.00249118	3345.79	0
mu133	0.265711	0.00070783	375.388	0	0.999999999671484	0.998611148565778	-392652.863365186	29512	Tu_0_bud
shape133	0.759418	0.000323844	2345.02	0	0.999999999671462
scale133	7.81957	0.00276067	2832.49	0
mu134	0.282637	0.000996776	283.551	0	0.999999999534614	0.998421159745277	-383277.571480426	29514	Ty_0_bud
shape134	0.804593	0.000407982	1972.13	0	0.999999999534583
scale134	7.36742	0.00287619	2561.53	0
mu135	0.165143	0.000757244	218.084	0	0.999999999855526	0.999332372692703	-424407.488025241	29505	Uk_1
shape135	0.826637	0.000334702	2469.77	0	0.999999999855516
scale135	6.6796	0.00208574	3202.5	0
mu136	0.274805	0.000888944	309.136	0	0.999999999710421	0.998801351256056	-399815.769594553	29508	Uk_1_bud
shape136	0.812364	0.000351045	2314.13	0	0.999999999710401
scale136	7.66583	0.00254415	3013.12	0
mu137	0.29019	0.000732586	396.117	0	0.999999999705983	0.998599585803974	-391485.931755719	29508	Uod_1_bud
shape137	0.731624	0.000314105	2329.23	0	0.999999999705963
scale137	8.6825	0.00320021	2713.1	0
mu138	0.266648	0.00102743	259.529	0	0.999999999865968	0.999234550479953	-424235.712087962	29523	Utrecht_bud
shape138	0.876883	0.000344412	2546.03	0	0.999999999865959
scale138	8.56847	0.00242371	3535.27	0
mu139	0.330428	0.00098597	335.13	0	0.999999999432165	0.998204513835261	-376453.919555962	29517	Van_0_bud
shape139	0.795533	0.000415692	1913.76	0	0.999999999432126
scale139	7.37737	0.00301453	2447.27	0
mu140	0.153395	0.00050318	304.852	0	0.999999999963594	0.999644547407145	-458667.862811985	29423	Vind_1
shape140	0.793636	0.000237391	3343.16	0	0.999999999963592
scale140	8.26556	0.00203731	4057.09	0
mu141	0.188474	0.000790932	238.293	0	0.99999999967854	0.998813082929689	-394573.940842717	29487	Wa_1
shape141	0.791294	0.000382982	2066.14	0	0.999999999678518
scale141	6.57686	0.00250529	2625.19	0
mu142	0.299035	0.000915356	326.687	0	0.999999999540984	0.998430209500598	-382212.309932546	29506	Westkar_4_bud
shape142	0.784506	0.000399182	1965.28	0	0.999999999540953
scale142	7.36052	0.00296095	2485.86	0
mu143	0.273939	0.00102605	266.985	0	0.999999999551262	0.998422945805514	-385629.467296601	29517	Wl_0_bud
shape143	0.820075	0.000400043	2049.97	0	0.999999999551231
scale143	7.55739	0.00278574	2712.88	0
mu144	0.212667	0.000719638	295.52	0	0.999999999826809	0.999092525301245	-415727.555523826	29511	Ws_2_bud
shape144	0.809799	0.000307456	2633.87	0	0.999999999826797
scale144	7.58718	0.00222728	3406.48	0
mu145	0.180118	0.000775239	232.338	0	0.999999999787936	0.999144226124093	-411061.877059825	29498	Wt_5
shape145	0.811758	0.000356918	2274.36	0	0.999999999787922
scale145	6.83918	0.00239358	2857.3	0
mu146	0.14081	0.000650665	216.41	0	0.999999999934808	0.99956982547125	-445726.139411129	29406	Yo_0
shape146	0.82335	0.000268641	3064.87	0	0.999999999934803
scale146	7.38555	0.00191227	3862.2	0
mu147	0.162393	0.000639596	253.899	0	0.999999999880882	0.999381653557015	-426446.804235824	29493	Zdr_1
shape147	0.798919	0.000319212	2502.78	0	0.999999999880874
scale147	6.97947	0.00231544	3014.31	0
mu148	0.23357	0.000732887	318.698	0	0.99999999972671	0.998810997914701	-399108.614283171	29508	Zdr_1_bud
shape148	0.781786	0.00033175	2356.55	0	0.999999999726691
scale148	7.38009	0.00252113	2927.3	0
mu149	0.159359	0.000591958	269.206	0	0.999999999979226	0.999725677423422	-476726.69240288	29501	Er_0
shape149	0.833771	0.000213909	3897.78	0	0.999999999979225
scale149	9.37052	0.00186081	5035.72	0
mu150	0.2011	0.000577656	348.132	0	0.999999999862978	0.999140908095759	-419820.750755295	29508	Er_0_bud
shape150	0.767503	0.000266867	2875.97	0	0.999999999862969
scale150	7.75215	0.00220971	3508.22	0

## Sheet: 4250bp
					Non-linear fits for I[R] Arabidopsis Thaliana ecotypes
							Genomic region 4250bp
	The two methods of model validation were used:
	1) Data splitting-Randomly split the data, obtain a prediction equation on one half
	of the random split and then check its predictive power (cross-validate) on the other
	sample.
	2) An estimate of the average predictive power of the equation on many other samples
	from the same population, using a formula due to Stein
Reference	J. P. Stevens, Applied Multivariate Statistics for the Social Sciences. (Routledge Academic, Fifth Edit., 2009)
	Estimate	Std. Error	t value	Pr(>|t|))	Adj.R.Square	R.Cross.val	AIC	sample.size	Sample
mu	0.178099	0.000703163	253.283	0	0.999999999890717	0.999346041167407	-403076.339810232	27772	Aa_0
shape	0.807819	0.000309157	2612.98	0	0.999999999890709
scale	7.3656	0.00222445	3311.21	0
mu1	0.147905	0.000630294	234.66	0	0.999999999927641	0.99948751265427	-412774.885350266	27778	Abd_0
shape1	0.794982	0.000284471	2794.6	0	0.999999999927636
scale1	7.51119	0.00227907	3295.73	0
mu2	0.162993	0.000585336	278.461	0	0.999999999971683	0.999654716587461	-431919.4943394	27731	Ag_0
shape2	0.781684	0.00022887	3415.4	0	0.999999999971681
scale2	9.58048	0.00240833	3978.06	0
mu3	0.183029	0.000646679	283.029	0	0.999999999921267	0.999376703995503	-407797.275131896	27766	Ag_0_bud
shape3	0.78626	0.000273793	2871.73	0	0.999999999921261
scale3	8.21575	0.00229778	3575.51	0
mu4	0.143624	0.000628985	228.343	0	0.999999999960896	0.999682328187542	-432536.044015926	27700	Ak_1
shape4	0.821154	0.000259704	3161.89	0	0.999999999960893
scale4	8.0839	0.00219614	3680.96	0
mu5	0.189312	0.000782095	242.057	0	0.99999999989508	0.999342212717388	-397670.621378281	27754	Altai_5
shape5	0.783696	0.00031885	2457.88	0	0.999999999895072
scale5	8.27479	0.0029437	2811.02	0
mu6	0.211203	0.00101657	207.76	0	0.999999999755794	0.998957130639007	-378717.513375554	27724	Amel_1
shape6	0.829662	0.000387586	2140.59	0	0.999999999755777
scale6	7.41058	0.00263521	2812.14	0
mu7	0.173194	0.00065971	262.531	0	0.999999999948166	0.999561399312228	-423299.206137264	27763	An_1
shape7	0.817381	0.000268829	3040.53	0	0.999999999948162
scale7	8.04376	0.00206811	3889.42	0
mu8	0.146293	0.000866788	168.776	0	0.999999999938603	0.999570983415569	-418107.787456072	27726	Anholt_1
shape8	0.818112	0.000283492	2885.84	0	0.999999999938598
scale8	8.13541	0.00231052	3521.04	0
mu9	-0.0791372	0.00116306	-68.0419	0	0.999999999986909	0.999665656171373	-448654.517639453	27634	Ann_1
shape9	0.885861	0.000235048	3768.84	0	0.999999999986908
scale9	15.1469	0.00237146	6387.16	0
mu10	0.154909	0.000673638	229.959	0	0.999999999900987	0.999364626242359	-403927.822389176	27775	Anz_0
shape10	0.791322	0.000290813	2721.07	0	0.99999999990098
scale10	7.53338	0.00226557	3325.15	0
mu11	0.166084	0.000717395	231.51	0	0.999999999928836	0.999487702507077	-411293.058079157	27729	Appt_1
shape11	0.799975	0.000286708	2790.21	0	0.999999999928831
scale11	7.95668	0.00237781	3346.22	0
mu12	0.127468	0.000536186	237.731	0	0.999999999985426	0.99979699567664	-458326.098589473	27735	Ba_1
shape12	0.811089	0.000200058	4054.26	0	0.999999999985425
scale12	8.83515	0.00186025	4749.43	0
mu13	0.137882	0.000710411	194.088	0	0.99999999995877	0.999626394144624	-427048.111745217	27751	Baa_1
shape13	0.804693	0.000256144	3141.56	0	0.999999999958767
scale13	8.42857	0.00209235	4028.29	0
mu14	0.14763	0.0007083	208.429	0	0.999999999941592	0.999598151642019	-422581.883985661	27720	Benk_1
shape14	0.826273	0.000280276	2948.07	0	0.999999999941588
scale14	7.48784	0.00206325	3629.14	0
mu15	-0.142923	0.00171884	-83.1509	0	0.999999999947951	0.999337021812392	-412859.136195116	27676	Bik_1
shape15	0.916516	0.000323881	2829.79	0	0.999999999947947
scale15	13.3678	0.00314564	4249.61	0
mu16	0.180062	0.000645175	279.09	0	0.999999999928253	0.999441204884913	-414190.566736454	27783	Bl_1
shape16	0.811305	0.000278807	2909.92	0	0.999999999928247
scale16	7.9938	0.00210563	3796.4	0
mu17	0.18459	0.000897639	205.639	0	0.999999999858915	0.999220830889372	-392273.507799757	27750	Bla_1
shape17	0.80896	0.000341834	2366.53	0	0.999999999858905
scale17	7.73779	0.00262113	2952.08	0
mu18	0.132486	0.000665043	199.213	0	0.999999999983595	0.999794365211664	-451550.875805182	27730	Boot_1
shape18	0.825703	0.000237498	3476.68	0	0.999999999983594
scale18	9.54238	0.00248477	3840.35	0
mu19	-0.00534018	0.00122859	-4.34659	1.38762e-05	0.999999999996958	0.999868374859616	-500608.044140231	27791	Bor_4
shape19	0.958708	0.000172779	5548.76	0	0.999999999996958
scale19	15.4058	0.00192374	8008.22	0
mu20	0.0725039	0.000350001	207.154	0	0.999999999999302	0.999938962104067	-546050.734579445	27786	Bor_4_bud
shape20	0.877603	8.73895e-05	10042.4	0	0.999999999999302
scale20	11.4786	0.00077109	14886.2	0
mu21	0.233473	0.00073177	319.053	0	0.999999999807218	0.99892079030838	-381803.014990492	27778	Br_0_bud
shape21	0.766274	0.000317961	2409.96	0	0.999999999807204
scale21	7.83366	0.00264635	2960.17	0
mu22	0.124933	0.00064763	192.908	0	0.999999999978926	0.999745430510171	-448062.32075267	27785	Bs_1
shape22	0.838056	0.000240888	3479.02	0	0.999999999978925
scale22	9.20156	0.00220095	4180.71	0
mu23	0.181445	0.000728707	248.996	0	0.999999999843335	0.999257599216375	-394831.695107511	27781	Bsch_0
shape23	0.823349	0.000356618	2308.77	0	0.999999999843324
scale23	6.72486	0.00225413	2983.35	0
mu24	0.236375	0.00145152	162.847	0	0.999999999768097	0.999046325634503	-383537.902074354	27788	Bu_0
shape24	0.91701	0.000474874	1931.06	0	0.99999999976808
scale24	7.66971	0.00276875	2770.1	0
mu25	0.148448	0.000569516	260.656	0	0.999999999946816	0.999553228884593	-423561.279522057	27766	Ca_0
shape25	0.805677	0.000254327	3167.88	0	0.999999999946812
scale25	7.74021	0.00193774	3994.45	0
mu26	0.217593	0.00094142	231.133	0	0.999999999709514	0.998847312120737	-374875.101745077	27774	Cal_0
shape26	0.812559	0.000391315	2076.48	0	0.999999999709493
scale26	7.13899	0.00263571	2708.57	0
mu27	0.162123	0.000689549	235.114	0	0.999999999937497	0.999555174477933	-416211.381248804	27743	Chat_1
shape27	0.805114	0.000290571	2770.8	0	0.999999999937493
scale27	7.67481	0.00238696	3215.31	0
mu28	0.251127	0.000930142	269.988	0	0.999999999790901	0.9989266663138	-380184.2876393	27746	Chi_0
shape28	0.797989	0.000340966	2340.38	0	0.999999999790886
scale28	8.25327	0.00278253	2966.11	0
mu29	0.12609	0.000815746	154.57	0	0.999999999985165	0.999741243616591	-449343.119571217	27690	Cnt_1
shape29	0.813652	0.000209903	3876.33	0	0.999999999985164
scale29	10.6186	0.00194844	5449.8	0
mu30	0.218612	0.000758921	288.056	0	0.999999999733485	0.998827327595353	-375217.732028771	27782	Co_1_bud
shape30	0.772274	0.000350488	2203.42	0	0.999999999733466
scale30	7.24239	0.00266098	2721.7	0
mu31	0.182081	0.000720472	252.724	0	0.999999999901766	0.999307702955078	-400565.310628021	27728	Com_1
shape31	0.791975	0.000292009	2712.16	0	0.999999999901759
scale31	8.13186	0.00239489	3395.5	0
mu32	0.0380395	0.00194316	19.5761	9.24099e-85	0.999999999980534	0.999665065802175	-442551.573871115	27748	Cvi_0
shape32	0.838618	0.000289009	2901.7	0	0.999999999980533
scale32	11.4506	0.00305405	3749.31	0
mu33	0.198341	0.000690632	287.188	0	0.99999999992082	0.999390719553896	-408262.139506765	27761	Da_1_12
shape33	0.787267	0.000274094	2872.25	0	0.999999999920814
scale33	8.4777	0.00241498	3510.46	0
mu34	0.138145	0.000713627	193.582	0	0.999999999938613	0.999579049739809	-418514.353806779	27716	Db_1
shape34	0.820753	0.000292965	2801.54	0	0.999999999938608
scale34	7.73316	0.00233438	3312.73	0
mu35	0.142471	0.00106555	133.707	0	0.999999999964998	0.999611395455652	-425947.82430242	27691	Di_G
shape35	0.810611	0.000265622	3051.75	0	0.999999999964996
scale35	9.94459	0.00232396	4279.15	0
mu36	0.233223	0.00098539	236.681	0	0.999999999634019	0.998593410408504	-363027.188918425	27777	Dja_1
shape36	0.796028	0.000421109	1890.31	0	0.999999999633993
scale36	7.38166	0.00307215	2402.77	0
mu37	0.21543	0.000666659	323.149	0	0.999999999956306	0.999467268970719	-414530.628214917	27650	Ei_2
shape37	0.772319	0.000233677	3305.07	0	0.999999999956303
scale37	10.1191	0.00257725	3926.31	0
mu38	0.190567	0.000807188	236.087	0	0.999999999787296	0.999051610943332	-383297.136803505	27771	El_0
shape38	0.798286	0.000356396	2239.89	0	0.99999999978728
scale38	7.07692	0.0025389	2787.4	0
mu39	0.149868	0.00057871	258.968	0	0.999999999965398	0.999636472782844	-429416.277622602	27738	Ema_1
shape39	0.789113	0.000242369	3255.83	0	0.999999999965395
scale39	8.55237	0.00225784	3787.85	0
mu40	0.245338	0.000743234	330.096	0	0.999999999735236	0.998730307047513	-372933.079828532	27778	Ema_1_bud
shape40	0.755851	0.000334861	2257.2	0	0.999999999735217
scale40	7.52863	0.00275523	2732.49	0
mu41	0.191357	0.000779191	245.585	0	0.999999999794792	0.999060938937644	-385162.823481673	27753	En_D
shape41	0.80729	0.000349415	2310.41	0	0.999999999794777
scale41	7.1503	0.00240132	2977.65	0
mu42	0.233578	0.000893343	261.465	0	0.99999999979537	0.998919570732875	-378507.471848252	27779	Es_0
shape42	0.799547	0.000364844	2191.48	0	0.999999999795355
scale42	7.97439	0.00285322	2794.87	0
mu43	0.236803	0.000901342	262.723	0	0.999999999671416	0.998704244649329	-368981.582498761	27781	Est
shape43	0.798036	0.000397255	2008.88	0	0.999999999671393
scale43	7.14581	0.00278323	2567.45	0
mu44	0.127594	0.000558661	228.392	0	0.99999999998539	0.999784390357443	-453341.539055471	27769	Et_0
shape44	0.803758	0.000224942	3573.18	0	0.999999999985389
scale44	9.51575	0.00224413	4240.28	0
mu45	0.162712	0.0006113	266.174	0	0.999999999933709	0.999505143578404	-416666.349203168	27768	Fi_0
shape45	0.805092	0.000280862	2866.51	0	0.999999999933704
scale45	7.79306	0.00214859	3627.05	0
mu46	0.198123	0.000879156	225.356	0	0.999999999874514	0.99921939212879	-393410.271886355	27778	Fr_2
shape46	0.803574	0.000328253	2448.03	0	0.999999999874505
scale46	8.38832	0.00278363	3013.45	0
mu47	0.241662	0.000897579	269.238	0	0.999999999796994	0.99893392120235	-379734.645675623	27778	Fr_2_bud
shape47	0.791288	0.000348663	2269.5	0	0.999999999796979
scale47	8.11757	0.00286901	2829.4	0
mu48	0.180163	0.000755584	238.443	0	0.99999999991091	0.999409434865104	-404086.698390536	27771	Ga_0
shape48	0.789835	0.000310815	2541.18	0	0.999999999910903
scale48	8.17995	0.00274938	2975.2	0
mu49	0.202888	0.000751027	270.148	0	0.999999999855187	0.999195485796931	-396307.85323807	27767	Gel_1
shape49	0.803256	0.000306958	2616.82	0	0.999999999855177
scale49	7.70784	0.0023069	3341.21	0
mu50	0.236145	0.000905697	260.733	0	0.999999999808393	0.998875961875488	-379824.960711525	27779	Gie_0
shape50	0.792569	0.000335806	2360.2	0	0.999999999808379
scale50	8.71225	0.00291687	2986.85	0
mu51	-0.210271	0.00160279	-131.191	0	0.999999999897496	0.999458757764534	-425976.30730006	27794	Gifu_2
shape51	1.02574	0.000344185	2980.21	0	0.999999999897489
scale51	11.0015	0.00243056	4526.35	0
mu52	0.126093	0.00054624	230.838	0	0.999999999972981	0.999739708954408	-441601.688828077	27746	Got_7
shape52	0.808552	0.000245447	3294.2	0	0.999999999972979
scale52	7.88853	0.00210567	3746.33	0
mu53	0.122103	0.000556963	219.229	0	0.99999999998014	0.999768294038725	-449081.820455251	27734	Gr_1
shape53	0.805347	0.000232033	3470.84	0	0.999999999980139
scale53	8.85842	0.00215121	4117.89	0
mu54	0.15517	0.000573056	270.777	0	0.99999999993525	0.999521985679498	-419022.168446131	27769	Gre_0
shape54	0.802994	0.000265801	3021.03	0	0.999999999935246
scale54	7.49843	0.00199265	3763.05	0
mu55	0.0739391	0.000864972	85.4814	0	0.999999999987709	0.999824492506515	-466177.084895319	27751	Gu_0
shape55	0.84354	0.000222442	3792.19	0	0.999999999987708
scale55	9.08365	0.00163387	5559.6	0
mu56	0.207341	0.000788718	262.884	0	0.999999999802957	0.999009522724038	-380322.807760311	27773	Gy_0
shape56	0.774196	0.000355557	2177.42	0	0.999999999802942
scale56	7.46214	0.00281694	2649.02	0
mu57	0.234179	0.000679589	344.589	0	0.99999999986157	0.999005658043287	-388968.951490398	27778	HR_5_bud
shape57	0.762706	0.000281592	2708.55	0	0.99999999986156
scale57	8.59292	0.00261772	3282.6	0
mu58	0.175434	0.000794391	220.841	0	0.999999999845795	0.999232579253466	-393339.002689495	27777	Ha_0
shape58	0.820699	0.000358894	2286.74	0	0.999999999845784
scale58	7.0925	0.00240842	2944.88	0
mu59	0.181855	0.000755496	240.709	0	0.999999999867941	0.99929133432563	-396519.489052572	27757	Hey_1
shape59	0.804271	0.000331251	2427.98	0	0.999999999867932
scale59	7.20443	0.00238691	3018.31	0
mu60	0.1772	0.000738991	239.786	0	0.999999999840671	0.999171654930921	-388959.651452394	27772	Hs_0
shape60	0.782225	0.000331092	2362.56	0	0.99999999984066
scale60	7.23264	0.00254453	2842.43	0
mu61	0.196752	0.000797959	246.569	0	0.999999999709439	0.998819070480343	-373276.892536905	27787	In_0
shape61	0.79023	0.000374216	2111.69	0	0.999999999709418
scale61	7.22391	0.00273549	2640.82	0
mu62	0.166798	0.000668314	249.581	0	0.999999999901504	0.999368087425185	-402457.206827052	27751	Is_0
shape62	0.781999	0.000298312	2621.41	0	0.999999999901497
scale62	7.5511	0.00246813	3059.44	0
mu63	0.201344	0.000743168	270.927	0	0.999999999792916	0.998977560178811	-382697.783425533	27782	Is_0_bud
shape63	0.781875	0.000331042	2361.86	0	0.999999999792901
scale63	7.33204	0.002511	2919.97	0
mu64	0.171303	0.000598929	286.015	0	0.999999999948834	0.999526163449005	-419657.044677304	27763	Je_0
shape64	0.790589	0.000261897	3018.7	0	0.99999999994883
scale64	8.63427	0.00234459	3682.64	0
mu65	0.184261	0.000698014	263.978	0	0.999999999847441	0.999193894641168	-392863.777576643	27766	Jm_0
shape65	0.799768	0.000330136	2422.54	0	0.99999999984743
scale65	7.10814	0.00230782	3080.03	0
mu66	0.133594	0.00063757	209.536	0	0.99999999997732	0.999719795169296	-442290.60243603	27771	Kas_1
shape66	0.809744	0.000236821	3419.22	0	0.999999999977318
scale66	9.23267	0.002281	4047.64	0
mu67	0.166921	0.000782761	213.247	0	0.999999999879586	0.999366252853412	-400619.550086978	27725	Kelsterbach_4
shape67	0.814781	0.000325744	2501.29	0	0.999999999879577
scale67	7.12709	0.0022917	3109.96	0
mu68	0.197439	0.000877319	225.049	0	0.999999999866718	0.999250607262336	-393987.659742744	27762	Kil_0
shape68	0.81344	0.000340821	2386.71	0	0.999999999866709
scale68	8.07519	0.00273933	2947.87	0
mu69	0.17471	0.000556564	313.908	0	0.99999999995855	0.999556960016153	-424335.307606653	27731	Kin_0
shape69	0.783388	0.000240852	3252.56	0	0.999999999958547
scale69	8.8148	0.00222521	3961.34	0
mu70	0.217787	0.00067061	324.759	0	0.999999999874157	0.999162468947373	-395612.414478852	27780	Kin_0_bud
shape70	0.781801	0.00028622	2731.47	0	0.999999999874148
scale70	8.04285	0.00237394	3387.98	0
mu71	0.182388	0.000834272	218.62	0	0.999999999845075	0.999245047256625	-389354.175777547	27745	Kl_5
shape71	0.797536	0.000356622	2236.36	0	0.999999999845063
scale71	7.28005	0.00268559	2710.78	0
mu72	0.190009	0.000688206	276.093	0	0.999999999853201	0.999180550406617	-390480.806936123	27748	Knox_18
shape72	0.769424	0.00031008	2481.37	0	0.99999999985319
scale72	7.54024	0.00255811	2947.58	0
mu73	0.184282	0.000747764	246.444	0	0.999999999837118	0.999094513675656	-385980.207055859	27752	Kondara
shape73	0.773173	0.000326747	2366.27	0	0.999999999837106
scale73	7.74901	0.00269181	2878.73	0
mu74	0.146081	0.000656501	222.514	0	0.999999999908852	0.999496094562637	-411904.502929006	27749	Kro_0
shape74	0.824934	0.000309632	2664.24	0	0.999999999908845
scale74	6.7586	0.00202445	3338.49	0
mu75	0.209533	0.000795343	263.449	0	0.999999999754957	0.998929710525194	-377333.194267969	27764	Krot_0
shape75	0.780985	0.000358854	2176.33	0	0.99999999975494
scale75	7.14301	0.00266369	2681.62	0
mu76	0.211076	0.000751179	280.993	0	0.999999999816653	0.999095915007411	-385268.503617295	27768	Kyoto
shape76	0.784409	0.000347313	2258.51	0	0.99999999981664
scale76	7.17494	0.00257062	2791.13	0
mu77	0.167649	0.00063342	264.672	0	0.999999999934751	0.999484255311518	-412102.097068949	27757	Kz_9
shape77	0.784207	0.000283009	2770.96	0	0.999999999934747
scale77	8.30257	0.00254489	3262.45	0
mu78	0.217343	0.000738294	294.386	0	0.999999999793878	0.99894154888921	-380701.450926243	27780	La_0
shape78	0.774925	0.000334263	2318.31	0	0.999999999793864
scale78	7.50858	0.00262683	2858.42	0
mu79	0.108015	0.000415395	260.029	0	0.99999999996138	0.999725099092923	-450382.056383165	27771	Lan_0
shape79	0.853609	0.000230362	3705.52	0	0.999999999961377
scale79	5.92365	0.00117414	5045.09	0
mu80	0.159554	0.000628304	253.944	0	0.999999999960615	0.999571951699071	-422266.39744272	27751	Ler_1
shape80	0.769594	0.000237584	3239.25	0	0.999999999960612
scale80	9.26742	0.00247737	3740.83	0
mu81	0.216513	0.000756061	286.369	0	0.999999999829144	0.999056087068105	-387869.406438454	27777	Li_2_1_bud
shape81	0.788815	0.000314932	2504.72	0	0.999999999829131
scale81	7.78816	0.00248445	3134.76	0
mu82	0.183634	0.000791068	232.134	0	0.999999999898728	0.99935841722981	-399087.504371613	27726	Litva
shape82	0.787879	0.000312301	2522.82	0	0.99999999989872
scale82	8.05242	0.00274101	2937.76	0
mu83	0.226274	0.00076999	293.866	0	0.999999999601047	0.998530533175119	-363825.235660347	27773	Litva_bud
shape83	0.763919	0.000369513	2067.37	0	0.999999999601018
scale83	6.91372	0.00274131	2522.06	0
mu84	0.230119	0.000723765	317.946	0	0.999999999803099	0.99898167111286	-382717.546561355	27771	Lm_2
shape84	0.771497	0.000333611	2312.57	0	0.999999999803084
scale84	7.4095	0.00257738	2874.82	0
mu85	0.171128	0.000780372	219.29	0	0.999999999843393	0.999194564788527	-390790.926446939	27732	Lp2_2
shape85	0.803365	0.000338298	2374.72	0	0.999999999843381
scale85	6.94973	0.00230744	3011.88	0
mu86	0.144283	0.000592315	243.593	0	0.999999999977981	0.99970581986577	-443856.21713851	27773	Mc_0
shape86	0.814012	0.000229392	3548.56	0	0.99999999997798
scale86	9.67805	0.00228682	4232.1	0
mu87	0.212341	0.000861736	246.41	0	0.999999999812411	0.999071573527365	-387658.500459515	27780	Mh_0_bud
shape87	0.823668	0.000356676	2309.29	0	0.999999999812398
scale87	7.3481	0.00239365	3069.83	0
mu88	0.252607	0.000923786	273.447	0	0.99999999981333	0.999039021471434	-388183.160279501	27790	Ms_0_bud
shape88	0.833727	0.000350544	2378.38	0	0.999999999813317
scale88	7.82385	0.00243986	3206.68	0
mu89	0.205824	0.000657857	312.871	0	0.999999999786912	0.998979926712598	-382926.09659816	27777	Mz_0_bud
shape89	0.778433	0.000328397	2370.4	0	0.999999999786897
scale89	7.01215	0.00239378	2929.32	0
mu90	0.192461	0.000652627	294.903	0	0.999999999857668	0.99918867977965	-393811.707087937	27778	Nc_1_bud
shape90	0.781089	0.000302747	2580	0	0.999999999857657
scale90	7.29396	0.00229534	3177.73	0
mu91	0.215422	0.000812199	265.233	0	0.999999999786388	0.998951369186986	-379465.038372125	27774	Neo_6_bud
shape91	0.77622	0.000342747	2264.7	0	0.999999999786373
scale91	7.74073	0.00278426	2780.17	0
mu92	0.222017	0.000697887	318.128	0	0.999999999910783	0.999279964328296	-405028.053804188	27778	Nok_3_bud
shape92	0.798403	0.000270336	2953.37	0	0.999999999910776
scale92	8.61087	0.00228628	3766.33	0
mu93	0.273844	0.00123554	221.639	0	0.999999999374839	0.99812371069396	-351167.192973188	27786	Np_0_bud
shape93	0.832327	0.000490092	1698.31	0	0.999999999374794
scale93	7.22414	0.00315405	2290.44	0
mu94	0.235476	0.000979617	240.375	0	0.999999999797462	0.999119817906506	-390830.120194986	27782	Nw_0_bud
shape94	0.872064	0.000385124	2264.37	0	0.999999999797447
scale94	7.12942	0.00226982	3140.96	0
mu95	0.215737	0.000594082	363.143	0	0.999999999883505	0.99919884765454	-398151.134875737	27790	Ob_0_bud
shape95	0.779636	0.000279489	2789.5	0	0.999999999883497
scale95	7.8911	0.00228438	3454.37	0
mu96	0.23508	0.000891755	263.615	0	0.99999999973435	0.998854563523916	-377255.865462631	27776	Old_1_bud
shape96	0.805496	0.000366701	2196.6	0	0.999999999734331
scale96	7.52467	0.00261915	2872.94	0
mu97	0.210397	0.000518029	406.15	0	0.999999999949002	0.999401732677995	-415617.192622332	27772	Ove_0_bud
shape97	0.752823	0.000216254	3481.19	0	0.999999999948999
scale97	9.78646	0.00237646	4118.08	0
mu98	0.176415	0.000638279	276.392	0	0.99999999993859	0.999506043908182	-413906.846928567	27721	Per_1
shape98	0.782819	0.000271704	2881.14	0	0.999999999938586
scale98	8.43015	0.00254188	3316.51	0
mu99	0.179114	0.000511766	349.993	0	0.999999999970843	0.999616720232051	-431883.422497325	27699	Pi_0
shape99	0.770369	0.000214936	3584.17	0	0.999999999970841
scale99	9.4478	0.00222184	4252.23	0
mu100	0.234836	0.000780527	300.868	0	0.999999999836205	0.999010454431188	-386841.827318904	27781	Pla_0_bud
shape100	0.795632	0.000321486	2474.86	0	0.999999999836193
scale100	7.98883	0.00252701	3161.38	0
mu101	0.145065	0.000452257	320.757	0	0.99999999997657	0.999670967584327	-449777.537429106	27760	Pna_17_bud
shape101	0.818154	0.00017516	4670.9	0	0.999999999976568
scale101	8.54952	0.00141886	6025.62	0
mu102	0.265827	0.000810882	327.825	0	0.999999999645064	0.998494432807107	-366763.003696139	27775	Pog_0_bud
shape102	0.774313	0.000343111	2256.74	0	0.999999999645039
scale102	7.83495	0.00281928	2779.06	0
mu103	0.159072	0.000588984	270.079	0	0.999999999976161	0.999682126006404	-437516.841137708	27762	Pro_0_bud
shape103	0.784887	0.000224373	3498.14	0	0.999999999976159
scale103	9.84885	0.00249592	3945.98	0
mu104	0.150263	0.000591139	254.193	0	0.999999999856111	0.999358240253147	-405454.798936485	27733	Pt_0
shape104	0.813146	0.000290308	2800.98	0	0.999999999856101
scale104	6.51078	0.00181056	3596.01	0
mu105	0.210439	0.000836522	251.564	0	0.99999999980023	0.99904514779224	-382823.918355827	27776	Pu2_23
shape105	0.799085	0.00036887	2166.31	0	0.999999999800216
scale105	7.10033	0.00260762	2722.92	0
mu106	0.261471	0.000705852	370.433	0	0.999999999768761	0.998736927980324	-373180.170148706	27776	Pu2_23_bud
shape106	0.740899	0.00031882	2323.88	0	0.999999999768744
scale106	8.21308	0.00300188	2735.97	0
mu107	0.180482	0.000624808	288.859	0	0.999999999956016	0.999564506850071	-425273.38273376	27746	Pu2_7_bud
shape107	0.804245	0.000249855	3218.85	0	0.999999999956012
scale107	8.92648	0.00221838	4023.88	0
mu108	0.16755	0.000781626	214.361	0	0.999999999892915	0.999393892372008	-404566.079984663	27763	Ra_0
shape108	0.828216	0.000327583	2528.26	0	0.999999999892908
scale108	7.42285	0.00232483	3192.85	0
mu109	0.107946	0.000867705	124.404	0	0.999999999983899	0.999749629793241	-448967.814462973	27729	Ragl_1
shape109	0.808827	0.000225065	3593.75	0	0.999999999983898
scale109	10.2257	0.00200092	5110.53	0
mu110	0.329753	0.000848875	388.459	0	0.999999999666134	0.998429832218686	-362607.586831496	27781	Ragl_1_bud
shape110	0.744802	0.000345958	2152.87	0	0.99999999966611
scale110	8.82969	0.00346342	2549.41	0
mu111	-0.0553403	0.000997322	-55.4889	0	0.999999999988696	0.999709798777686	-454824.604332507	27648	Rd_0
shape111	0.876253	0.000218316	4013.68	0	0.999999999988695
scale111	14.6906	0.00223059	6585.98	0
mu112	0.237727	0.000722919	328.844	0	0.999999999832253	0.999003419988262	-387516.764072228	27774	Rennes_1_bud
shape112	0.784629	0.000303341	2586.63	0	0.999999999832241
scale112	8.01229	0.00247931	3231.66	0
mu113	0.228863	0.0007242	316.022	0	0.999999999791572	0.998939594649759	-380523.782732637	27769	Rld_1_bud
shape113	0.769354	0.000327566	2348.7	0	0.999999999791557
scale113	7.68817	0.00268284	2865.68	0
mu114	0.286955	0.000991222	289.496	0	0.999999999688584	0.998535377523171	-367315.915012657	27788	Rmx_A02_bud
shape114	0.785781	0.000362471	2167.85	0	0.999999999688561
scale114	8.53545	0.0031193	2736.34	0
mu115	0.244577	0.000707836	345.527	0	0.999999999854585	0.999095703078652	-391676.573562328	27785	Rome_1_bud
shape115	0.787831	0.000308763	2551.57	0	0.999999999854574
scale115	7.98841	0.00248145	3219.25	0
mu116	0.255439	0.000946649	269.835	0	0.999999999838983	0.999086526822746	-387178.523707252	27774	RRS_7
shape116	0.813425	0.00035451	2294.5	0	0.999999999838971
scale116	8.16481	0.00274053	2979.28	0
mu117	0.248071	0.000824425	300.902	0	0.999999999692384	0.998569091457545	-365407.333949152	27778	Rubezhnoe_1_bud
shape117	0.753013	0.000358737	2099.06	0	0.999999999692362
scale117	7.85125	0.00309781	2534.45	0
mu118	0.245166	0.000913995	268.235	0	0.99999999978102	0.998915492253567	-378588.899009946	27771	Se_0_bud
shape118	0.803429	0.000369032	2177.13	0	0.999999999781004
scale118	7.85727	0.00281164	2794.55	0
mu119	0.158593	0.000671473	236.187	0	0.999999999897541	0.999341936222867	-403661.663486493	27774	Seattle_0
shape119	0.801916	0.000295357	2715.07	0	0.999999999897534
scale119	7.64417	0.0022818	3350.06	0
mu120	0.243453	0.000854661	284.853	0	0.999999999841369	0.999014802326938	-385925.752670132	27785	Sei_0_bud
shape120	0.792593	0.000323195	2452.36	0	0.999999999841358
scale120	8.68232	0.00279762	3103.47	0
mu121	0.290604	0.00167631	173.36	0	0.999999999550227	0.998634167590103	-367281.692219321	27795	Sg_1
shape121	0.935387	0.000546641	1711.15	0	0.999999999550194
scale121	7.61954	0.00302717	2517.05	0
mu122	0.142594	0.00066538	214.304	0	0.999999999966486	0.9996863807869	-432142.468810291	27726	Si_0
shape122	0.807347	0.000254394	3173.61	0	0.999999999966483
scale122	8.67776	0.00223244	3887.13	0
mu123	0.272194	0.000747526	364.127	0	0.999999999857491	0.998978493503233	-385496.137008504	27785	Sorbo_bud
shape123	0.75458	0.000294578	2561.56	0	0.999999999857481
scale123	9.25232	0.00300976	3074.1	0
mu124	0.312512	0.000866836	360.52	0	0.999999999705726	0.998506648850115	-366640.163935574	27788	Sp_0_bud
shape124	0.758805	0.000345193	2198.2	0	0.999999999705705
scale124	8.40937	0.00314187	2676.55	0
mu125	0.284825	0.000778546	365.842	0	0.999999999719257	0.998563480135998	-368249.888547086	27776	Sq_8_bud
shape125	0.750552	0.000331196	2266.19	0	0.999999999719237
scale125	8.39339	0.00311412	2695.27	0
mu126	0.149276	0.000746847	199.876	0	0.999999999900607	0.999368643150458	-402116.306357093	27746	Stw_0
shape126	0.806034	0.00030431	2648.73	0	0.999999999900599
scale126	7.86428	0.00243357	3231.59	0
mu127	0.165016	0.000542993	303.901	0	0.999999999968023	0.999650742333978	-433197.158384409	27705	Su_0
shape127	0.785611	0.00022699	3460.99	0	0.99999999996802
scale127	8.60344	0.00206374	4168.85	0
mu128	0.305684	0.00110037	277.802	0	0.999999999505338	0.998252005728625	-354417.654258951	27786	Sus_1_bud
shape128	0.80315	0.000449085	1788.41	0	0.999999999505303
scale128	7.57919	0.00325422	2329.04	0
mu129	0.325542	0.00108865	299.033	0	0.999999999615085	0.998481015642918	-364899.616640474	27786	Ta_0_bud
shape129	0.818793	0.000399163	2051.28	0	0.999999999615057
scale129	8.15211	0.00303511	2685.94	0
mu130	0.216727	0.000629279	344.405	0	0.999999999961966	0.999470246103565	-423043.831538129	27778	Tamm_2_bud
shape130	0.776253	0.000211701	3666.74	0	0.999999999961964
scale130	10.1461	0.00224073	4528.03	0
mu131	0.358736	0.00128813	278.493	0	0.999999999531967	0.998299373236556	-357907.586145854	27790	Tol_0_bud
shape131	0.82684	0.000438956	1883.65	0	0.999999999531934
scale131	8.46157	0.00339031	2495.81	0
mu132	0.278696	0.000959312	290.517	0	0.999999999785405	0.998848647779855	-379102.494032124	27785	Tscha_1_bud
shape132	0.799261	0.000342497	2333.63	0	0.999999999785389
scale132	8.67557	0.00290682	2984.56	0
mu133	0.284101	0.000806603	352.219	0	0.999999999637718	0.998474564012415	-363882.264457706	27775	Tu_0_bud
shape133	0.75783	0.000350821	2160.16	0	0.999999999637692
scale133	8.18123	0.00314327	2602.78	0
mu134	0.28866	0.0010546	273.716	0	0.999999999581976	0.998418251406953	-360817.163944141	27782	Ty_0_bud
shape134	0.807221	0.000414971	1945.25	0	0.999999999581946
scale134	7.77061	0.00307394	2527.9	0
mu135	0.187215	0.000885751	211.363	0	0.999999999842362	0.999259889084277	-394382.37425565	27780	Uk_1
shape135	0.830334	0.000362232	2292.27	0	0.99999999984235
scale135	6.93165	0.00230641	3005.38	0
mu136	0.271035	0.000981665	276.097	0	0.999999999732089	0.998771589686942	-375767.408137518	27784	Uk_1_bud
shape136	0.811983	0.00036062	2251.63	0	0.99999999973207
scale136	8.05599	0.00273983	2940.32	0
mu137	0.317222	0.000807438	392.875	0	0.999999999707463	0.998484352472709	-365691.874076627	27785	Uod_1_bud
shape137	0.734519	0.000326096	2252.46	0	0.999999999707442
scale137	9.15504	0.00349005	2623.19	0
mu138	0.264522	0.00121664	217.42	0	0.999999999870778	0.999241359340638	-397646.596127768	27792	Utrecht_bud
shape138	0.883901	0.000379558	2328.76	0	0.999999999870769
scale138	9.00818	0.00274792	3278.19	0
mu139	0.324483	0.00108537	298.96	0	0.999999999408275	0.998058222264687	-350374.122350266	27789	Van_0_bud
shape139	0.794893	0.000438893	1811.13	0	0.999999999408232
scale139	7.70755	0.00333341	2312.21	0
mu140	0.180151	0.000633306	284.462	0	0.999999999958882	0.999572440736213	-425908.62505506	27726	Vind_1
shape140	0.794817	0.000238837	3327.87	0	0.999999999958879
scale140	8.61284	0.00213506	4034	0
mu141	0.21609	0.000886449	243.77	0	0.999999999666757	0.998705941162348	-367643.805398036	27773	Wa_1
shape141	0.795769	0.000410768	1937.27	0	0.999999999666733
scale141	6.84596	0.00275309	2486.64	0
mu142	0.302931	0.00103957	291.4	0	0.999999999490871	0.998234094812908	-353989.004888235	27783	Westkar_4_bud
shape142	0.788629	0.00042972	1835.21	0	0.999999999490834
scale142	7.67755	0.00330075	2326	0
mu143	0.319043	0.00114732	278.076	0	0.99999999952982	0.998301869676167	-358653.86838013	27782	Wl_0_bud
shape143	0.815001	0.000423358	1925.09	0	0.999999999529786
scale143	7.82943	0.00310339	2522.87	0
mu144	0.235337	0.000822377	286.167	0	0.999999999818099	0.999004316785861	-387080.36197693	27784	Ws_2_bud
shape144	0.803822	0.000321796	2497.92	0	0.999999999818086
scale144	7.85615	0.00244216	3216.88	0
mu145	0.2011	0.000833413	241.297	0	0.999999999800407	0.999108201407311	-385972.531106672	27781	Wt_5
shape145	0.810451	0.000371866	2179.41	0	0.999999999800392
scale145	7.11823	0.00252811	2815.64	0
mu146	0.166618	0.000787548	211.566	0	0.999999999924451	0.999506880454394	-413366.97573308	27723	Yo_0
shape146	0.827421	0.000296747	2788.31	0	0.999999999924445
scale146	7.69809	0.0022312	3450.2	0
mu147	0.180827	0.000777852	232.47	0	0.999999999860559	0.999237960608801	-394201.093236324	27774	Zdr_1
shape147	0.806414	0.00033811	2385.06	0	0.999999999860549
scale147	7.32219	0.00244849	2990.49	0
mu148	0.265289	0.000895403	296.279	0	0.999999999679064	0.998594968078104	-368222.427367786	27784	Zdr_1_bud
shape148	0.78028	0.00036651	2128.95	0	0.999999999679041
scale148	7.69122	0.00287386	2676.27	0
mu149	0.204476	0.000693024	295.049	0	0.999999999975629	0.999683729501698	-441600.838953903	27780	Er_0
shape149	0.834106	0.000237497	3512.07	0	0.999999999975627
scale149	9.81818	0.00215802	4549.62	0
mu150	0.226057	0.000726602	311.116	0	0.999999999834912	0.999016364701313	-387116.988983487	27780	Er_0_bud
shape150	0.772963	0.000300508	2572.19	0	0.9999999998349
scale150	8.13377	0.00257222	3162.15	0

## Sheet: 4500bp
					Non-linear fits for I[R] Arabidopsis Thaliana ecotypes
							Genomic region 4500bp
	The two methods of model validation were used:
	1) Data splitting-Randomly split the data, obtain a prediction equation on one half
	of the random split and then check its predictive power (cross-validate) on the other
	sample.
	2) An estimate of the average predictive power of the equation on many other samples
	from the same population, using a formula due to Stein
Reference	J. P. Stevens, Applied Multivariate Statistics for the Social Sciences. (Routledge Academic, Fifth Edit., 2009)
	Estimate	Std. Error	t value	Pr(>|t|))	Adj.R.Square	R.Cross.val	AIC	sample.size	Sample
mu	0.186416	0.000741609	251.367	0	0.999999999909473	0.999417533737846	-383324.66363798	26238	Aa_0
shape	0.810668	0.000328124	2470.61	0	0.999999999909466
scale	7.73765	0.0025165	3074.77	0
mu1	0.166993	0.000694285	240.525	0	0.999999999926531	0.999462102597103	-386829.222177509	26238	Abd_0
shape1	0.795023	0.000305866	2599.25	0	0.999999999926525
scale1	7.84636	0.00256058	3064.3	0
mu2	0.166396	0.000791916	210.119	0	0.999999999968478	0.999589772304554	-403072.799929891	26214	Ag_0
shape2	0.789431	0.000239322	3298.62	0	0.999999999968475
scale2	10.1471	0.00245334	4136.04	0
mu3	0.224869	0.000840869	267.424	0	0.999999999892436	0.999225168132523	-374586.927141521	26230	Ag_0_bud
shape3	0.79845	0.000318517	2506.77	0	0.999999999892427
scale3	8.61913	0.00268291	3212.6	0
mu4	0.141976	0.00077829	182.42	0	0.999999999959719	0.999646311667072	-405662.899625239	26180	Ak_1
shape4	0.833159	0.0002716	3067.59	0	0.999999999959716
scale4	8.55231	0.0021089	4055.34	0
mu5	0.174768	0.000816825	213.96	0	0.999999999920575	0.999401504265902	-380654.590563619	26230	Altai_5
shape5	0.783848	0.000305093	2569.21	0	0.999999999920569
scale5	8.72196	0.00292277	2984.14	0
mu6	0.221571	0.00106064	208.903	0	0.999999999775107	0.998924681250651	-357536.024120391	26203	Amel_1
shape6	0.830555	0.000396732	2093.49	0	0.99999999977509
scale6	7.74294	0.00279933	2765.99	0
mu7	0.191291	0.00071518	267.472	0	0.999999999945572	0.999518687315008	-396199.369633257	26228	An_1
shape7	0.82459	0.000288772	2855.5	0	0.999999999945568
scale7	8.46495	0.00229009	3696.35	0
mu8	0.147613	0.000950647	155.276	0	0.999999999948471	0.99958667529583	-397155.086238648	26199	Anholt_1
shape8	0.827388	0.000295432	2800.61	0	0.999999999948467
scale8	8.63583	0.00249287	3464.21	0
mu9	-0.0865744	0.00129177	-67.0198	0	0.999999999989084	0.999675374366521	-426487.750071746	26128	Ann_1
shape9	0.90134	0.000231501	3893.47	0	0.999999999989083
scale9	16.0527	0.00261832	6130.9	0
mu10	0.180015	0.000797498	225.725	0	0.999999999891601	0.999324503613594	-376988.305626529	26242	Anz_0
shape10	0.796602	0.000324243	2456.8	0	0.999999999891593
scale10	7.92944	0.00262895	3016.21	0
mu11	0.159774	0.000859613	185.868	0	0.999999999932277	0.999489477263159	-387695.774508954	26219	Appt_1
shape11	0.808848	0.000302177	2676.73	0	0.999999999932272
scale11	8.41444	0.00256647	3278.6	0
mu12	0.137407	0.000582976	235.698	0	0.999999999985661	0.999794701446536	-430593.943158537	26200	Ba_1
shape12	0.816856	0.000223338	3657.48	0	0.99999999998566
scale12	9.32682	0.00210538	4430	0
mu13	0.143759	0.000762799	188.462	0	0.999999999962384	0.999629698846907	-403296.941070028	26217	Baa_1
shape13	0.807424	0.000263806	3060.67	0	0.999999999962381
scale13	8.90247	0.00228296	3899.53	0
mu14	0.146612	0.000783914	187.026	0	0.999999999942164	0.999580120916418	-397255.680159505	26201	Benk_1
shape14	0.834915	0.000300723	2776.36	0	0.999999999942159
scale14	7.92971	0.00228411	3471.69	0
mu15	-0.16984	0.00207222	-81.9606	0	0.999999999951572	0.999336270153443	-389632.528425109	26161	Bik_1
shape15	0.936076	0.000362472	2582.48	0	0.999999999951568
scale15	14.215	0.00352262	4035.36	0
mu16	0.210598	0.000670988	313.863	0	0.999999999940598	0.999469864169625	-393502.728572153	26235	Bl_1
shape16	0.807429	0.000282884	2854.28	0	0.999999999940593
scale16	8.35626	0.00225368	3707.82	0
mu17	0.201556	0.000933434	215.93	0	0.999999999876564	0.999228434403345	-371605.461222302	26222	Bla_1
shape17	0.810981	0.00034812	2329.6	0	0.999999999876554
scale17	8.10718	0.00276976	2927.03	0
mu18	0.145394	0.000824447	176.354	0	0.999999999984002	0.999782261144883	-424754.736988415	26205	Boot_1
shape18	0.830457	0.000247753	3351.95	0	0.999999999984001
scale18	10.0597	0.00238084	4225.26	0
mu19	-0.0443371	0.00115112	-38.5165	0	0.999999999997901	0.99988053648185	-480365.684288668	26250	Bor_4
shape19	0.981828	0.000158033	6212.82	0	0.999999999997901
scale19	16.4344	0.00177332	9267.6	0
mu20	0.0569126	0.00053343	106.692	0	0.999999999999216	0.999929629225074	-510337.869836304	26251	Bor_4_bud
shape20	0.888749	0.000104508	8504.16	0	0.999999999999215
scale20	12.1482	0.000956726	12697.6	0
mu21	0.241004	0.000808392	298.128	0	0.999999999813638	0.9988947019922	-359010.182811991	26240	Br_0_bud
shape21	0.763746	0.000331026	2307.21	0	0.999999999813623
scale21	8.18271	0.00289096	2830.45	0
mu22	0.162628	0.000741709	219.262	0	0.99999999997874	0.999729385144182	-420436.483985788	26239	Bs_1
shape22	0.842234	0.000252538	3335.08	0	0.999999999978739
scale22	9.69697	0.00231305	4192.28	0
mu23	0.188173	0.000818524	229.893	0	0.999999999829068	0.999154723729967	-368403.237164673	26245	Bsch_0
shape23	0.827556	0.000372306	2222.78	0	0.999999999829055
scale23	7.03203	0.00239435	2936.93	0
mu24	0.254657	0.00167015	152.476	0	0.999999999749563	0.99899150960721	-357781.931144344	26245	Bu_0
shape24	0.924075	0.000526762	1754.25	0	0.999999999749544
scale24	7.98759	0.00320052	2495.72	0
mu25	0.17503	0.000596426	293.465	0	0.999999999954209	0.999584636351795	-401501.42217912	26231	Ca_0
shape25	0.802961	0.000271619	2956.2	0	0.999999999954205
scale25	8.0908	0.00222739	3632.42	0
mu26	0.23939	0.00101678	235.44	0	0.999999999726821	0.998827159640017	-353288.469197899	26238	Cal_0
shape26	0.81407	0.000402691	2021.57	0	0.9999999997268
scale26	7.49774	0.00285512	2626.07	0
mu27	0.153803	0.000782706	196.502	0	0.999999999947572	0.999582159631804	-395305.560414004	26207	Chat_1
shape27	0.81217	0.000296601	2738.25	0	0.999999999947568
scale27	8.13719	0.00251978	3229.33	0
mu28	0.262191	0.00111731	234.663	0	0.999999999758002	0.998779624126405	-352982.284170504	26222	Chi_0
shape28	0.806982	0.000378562	2131.7	0	0.999999999757984
scale28	8.67312	0.00320406	2706.91	0
mu29	0.138416	0.00113203	122.272	0	0.999999999983776	0.99971347207225	-419810.905885699	26181	Cnt_1
shape29	0.825452	0.000225917	3653.78	0	0.999999999983775
scale29	11.2535	0.00231734	4856.23	0
mu30	0.202405	0.000912747	221.753	0	0.999999999731245	0.998768561014631	-351590.486560677	26237	Co_1_bud
shape30	0.787562	0.000381242	2065.78	0	0.999999999731225
scale30	7.71597	0.00294562	2619.47	0
mu31	0.185735	0.000857228	216.669	0	0.999999999906487	0.999305317048621	-377167.628968572	26192	Com_1
shape31	0.798587	0.000311521	2563.51	0	0.999999999906479
scale31	8.58553	0.00264871	3241.41	0
mu32	0.0633104	0.00201681	31.3913	2.2642e-212	0.999999999981382	0.999666961450671	-416930.062548028	26227	Cvi_0
shape32	0.847508	0.000287952	2943.22	0	0.99999999998138
scale32	12.071	0.00318934	3784.8	0
mu33	0.213721	0.000779957	274.016	0	0.999999999905393	0.999283378536164	-378488.976579809	26227	Da_1_12
shape33	0.795624	0.000298597	2664.54	0	0.999999999905386
scale33	8.88032	0.00266512	3332.04	0
mu34	0.158365	0.000788555	200.829	0	0.999999999950856	0.999615431818225	-398809.11904041	26197	Db_1
shape34	0.820549	0.000296568	2766.82	0	0.999999999950852
scale34	8.10548	0.00244755	3311.67	0
mu35	0.128112	0.00113112	113.261	0	0.999999999967761	0.999621143242597	-402031.216324563	26163	Di_G
shape35	0.81892	0.00027492	2978.76	0	0.999999999967758
scale35	10.543	0.00258133	4084.34	0
mu36	0.252138	0.00112508	224.106	0	0.999999999672559	0.998625204361355	-343286.324330578	26232	Dja_1
shape36	0.798244	0.000444565	1795.56	0	0.999999999672534
scale36	7.73482	0.00338232	2286.84	0
mu37	0.229576	0.000752995	304.885	0	0.999999999960665	0.999474432912078	-392201.825258395	26155	Ei_2
shape37	0.776375	0.000246631	3147.92	0	0.999999999960662
scale37	10.702	0.00285961	3742.48	0
mu38	0.21564	0.000899031	239.859	0	0.999999999786701	0.998998809906191	-359560.626113217	26234	El_0
shape38	0.800603	0.000377202	2122.48	0	0.999999999786685
scale38	7.39838	0.00276099	2679.61	0
mu39	0.147254	0.000707093	208.252	0	0.999999999961509	0.999582642676362	-400245.126427575	26210	Ema_1
shape39	0.798333	0.000263492	3029.81	0	0.999999999961506
scale39	8.99588	0.00236095	3810.28	0
mu40	0.245469	0.00084038	292.092	0	0.999999999721825	0.998635602172834	-348202.802781074	26243	Ema_1_bud
shape40	0.760039	0.000355827	2135.98	0	0.999999999721804
scale40	7.87398	0.00305058	2581.14	0
mu41	0.205397	0.000877408	234.096	0	0.999999999806637	0.999050737293843	-362842.982595949	26215	En_D
shape41	0.80711	0.000361843	2230.55	0	0.999999999806622
scale41	7.47229	0.00262873	2842.55	0
mu42	0.257348	0.000977215	263.348	0	0.999999999796607	0.998888101694891	-355123.688537776	26241	Es_0
shape42	0.798654	0.000392069	2037.02	0	0.999999999796591
scale42	8.29703	0.00319388	2597.79	0
mu43	0.255481	0.00106374	240.172	0	0.999999999669766	0.998640659688645	-345892.811651574	26240	Est
shape43	0.805012	0.000433358	1857.61	0	0.999999999669741
scale43	7.57008	0.00313485	2414.82	0
mu44	0.126729	0.0006887	184.012	0	0.999999999984924	0.999769603172081	-424911.313826974	26232	Et_0
shape44	0.811591	0.000221202	3669	0	0.999999999984923
scale44	10.0571	0.00224134	4487.09	0
mu45	0.164494	0.000711038	231.343	0	0.999999999938458	0.999490164017041	-393188.151824129	26239	Fi_0
shape45	0.812753	0.000284355	2858.23	0	0.999999999938453
scale45	8.20965	0.00227654	3606.19	0
mu46	0.221919	0.000997649	222.442	0	0.999999999871372	0.999162897220746	-368444.077874848	26244	Fr_2
shape46	0.812801	0.000355652	2285.38	0	0.999999999871362
scale46	8.8333	0.00308872	2859.86	0
mu47	0.25284	0.00105082	240.612	0	0.999999999806445	0.998898783637901	-357455.14640739	26248	Fr_2_bud
shape47	0.798676	0.000366157	2181.24	0	0.99999999980643
scale47	8.56601	0.00311948	2745.98	0
mu48	0.179568	0.000858446	209.178	0	0.99999999990629	0.999352660395095	-377941.558101542	26237	Ga_0
shape48	0.792161	0.000319123	2482.3	0	0.999999999906283
scale48	8.54048	0.00288263	2962.74	0
mu49	0.216201	0.000789952	273.688	0	0.999999999871384	0.999183497094822	-375174.687287194	26241	Gel_1
shape49	0.805999	0.000308066	2616.32	0	0.999999999871375
scale49	8.07467	0.00240264	3360.75	0
mu50	0.261914	0.00100546	260.493	0	0.999999999840759	0.998975164213656	-361106.317865008	26242	Gie_0
shape50	0.791141	0.000350501	2257.17	0	0.999999999840747
scale50	9.1545	0.00321907	2843.83	0
mu51	-0.239066	0.00157172	-152.105	0	0.999999999945859	0.999583160855677	-416480.881294616	26253	Gifu_2
shape51	1.05234	0.000322265	3265.46	0	0.999999999945855
scale51	11.6487	0.00232658	5006.78	0
mu52	0.137913	0.000628072	219.582	0	0.999999999974098	0.999730501549542	-416347.049629592	26225	Got_7
shape52	0.817435	0.000249526	3275.95	0	0.999999999974096
scale52	8.33512	0.00211227	3946.04	0
mu53	0.122473	0.000616864	198.542	0	0.999999999985011	0.999785183713515	-429173.423318767	26204	Gr_1
shape53	0.808955	0.000216775	3731.77	0	0.99999999998501
scale53	9.36267	0.00200548	4668.55	0
mu54	0.159531	0.000649577	245.592	0	0.999999999943756	0.999546301808986	-397284.300389713	26240	Gre_0
shape54	0.811	0.000281096	2885.14	0	0.999999999943752
scale54	7.95709	0.0022247	3576.71	0
mu55	0.103492	0.000739848	139.883	0	0.999999999989656	0.999838405157498	-442720.120662622	26224	Gu_0
shape55	0.842058	0.000211784	3976.02	0	0.999999999989656
scale55	9.54626	0.00174508	5470.39	0
mu56	0.237836	0.00093186	255.227	0	0.999999999787722	0.998889032815181	-354675.078157483	26224	Gy_0
shape56	0.784167	0.000382751	2048.76	0	0.999999999787706
scale56	7.88624	0.00307175	2567.35	0
mu57	0.246943	0.000712332	346.669	0	0.99999999988317	0.999067807433325	-369247.194065062	26242	HR_5_bud
shape57	0.762234	0.000293217	2599.55	0	0.999999999883162
scale57	9.04655	0.00287291	3148.91	0
mu58	0.198806	0.000864209	230.043	0	0.999999999872569	0.999262159046488	-374173.599028894	26243	Ha_0
shape58	0.819225	0.000353629	2316.62	0	0.99999999987256
scale58	7.44763	0.00245002	3039.83	0
mu59	0.190758	0.00085782	222.375	0	0.99999999986718	0.999273702324083	-372163.086137808	26232	Hey_1
shape59	0.809445	0.000351177	2304.95	0	0.99999999986717
scale59	7.56512	0.00269811	2803.86	0
mu60	0.181998	0.000759613	239.594	0	0.999999999871351	0.999243325333509	-370319.949404773	26228	Hs_0
shape60	0.779651	0.000334927	2327.82	0	0.999999999871341
scale60	7.58489	0.00272925	2779.11	0
mu61	0.237516	0.000869549	273.149	0	0.999999999743153	0.998834514799321	-353151.453014497	26243	In_0
shape61	0.785623	0.000380617	2064.08	0	0.999999999743134
scale61	7.5198	0.00293483	2562.26	0
mu62	0.164221	0.000782136	209.965	0	0.999999999906874	0.999353203601261	-379152.533875923	26209	Is_0
shape62	0.792111	0.000310391	2551.97	0	0.999999999906867
scale62	7.99448	0.00255945	3123.51	0
mu63	0.21085	0.000753117	279.97	0	0.999999999804463	0.998956786382486	-360548.982293084	26242	Is_0_bud
shape63	0.782906	0.000341248	2294.24	0	0.999999999804449
scale63	7.64539	0.00267458	2858.53	0
mu64	0.179676	0.000700025	256.671	0	0.999999999954359	0.999558855993355	-396956.427260459	26233	Je_0
shape64	0.792396	0.000282291	2807.02	0	0.999999999954356
scale64	9.07224	0.00273136	3321.52	0
mu65	0.193003	0.000788103	244.895	0	0.9999999998506	0.999150694473529	-369247.679085642	26226	Jm_0
shape65	0.806519	0.000342716	2353.32	0	0.999999999850588
scale65	7.44044	0.00245938	3025.33	0
mu66	0.146308	0.000729102	200.669	0	0.999999999976193	0.999707778598973	-414154.422469386	26235	Kas_1
shape66	0.817262	0.000259676	3147.23	0	0.999999999976191
scale66	9.75195	0.00259154	3762.99	0
mu67	0.15979	0.000814261	196.239	0	0.999999999885087	0.999330937416738	-377501.894463434	26201	Kelsterbach_4
shape67	0.818252	0.000329312	2484.74	0	0.999999999885078
scale67	7.51632	0.00238924	3145.9	0
mu68	0.212724	0.00102763	207.005	0	0.999999999850735	0.999132131626588	-366595.040413681	26228	Kil_0
shape68	0.820271	0.000364798	2248.56	0	0.999999999850724
scale68	8.4869	0.00295997	2867.22	0
mu69	0.162901	0.000652528	249.646	0	0.999999999962832	0.999563452602831	-401262.923610426	26209	Kin_0
shape69	0.788248	0.000242005	3257.16	0	0.999999999962829
scale69	9.31587	0.00239868	3883.74	0
mu70	0.227616	0.000747796	304.383	0	0.9999999998795	0.999164349106068	-372082.84887869	26242	Kin_0_bud
shape70	0.785151	0.000311565	2520.02	0	0.999999999879491
scale70	8.44547	0.00269172	3137.57	0
mu71	0.182622	0.000919602	198.588	0	0.999999999837201	0.99915125987293	-363830.774697621	26210	Kl_5
shape71	0.802435	0.000372224	2155.78	0	0.999999999837189
scale71	7.61535	0.00282176	2698.79	0
mu72	0.202041	0.000751806	268.741	0	0.999999999856354	0.999150806777374	-366973.138018358	26223	Knox_18
shape72	0.774129	0.000333148	2323.68	0	0.999999999856343
scale72	7.96868	0.00284713	2798.85	0
mu73	0.193367	0.000828481	233.399	0	0.999999999850263	0.999121009357522	-364332.767902479	26213	Kondara
shape73	0.772193	0.000337428	2288.47	0	0.999999999850251
scale73	8.11239	0.00297163	2729.95	0
mu74	0.136919	0.000709565	192.962	0	0.999999999929455	0.999545403556724	-393462.554172515	26224	Kro_0
shape74	0.827518	0.00031689	2611.38	0	0.99999999992945
scale74	7.14042	0.00217871	3277.37	0
mu75	0.22234	0.000900185	246.994	0	0.999999999740012	0.998812999424824	-352422.316860129	26231	Krot_0
shape75	0.786387	0.000381061	2063.68	0	0.999999999739992
scale75	7.47098	0.00290455	2572.17	0
mu76	0.19241	0.000868941	221.43	0	0.999999999807423	0.999028413047039	-360118.766140054	26231	Kyoto
shape76	0.791936	0.000378364	2093.06	0	0.999999999807408
scale76	7.54113	0.00288996	2609.42	0
mu77	0.177761	0.00073448	242.023	0	0.999999999941371	0.999486633136938	-389743.536048862	26231	Kz_9
shape77	0.787719	0.000281709	2796.22	0	0.999999999941366
scale77	8.72125	0.00262915	3317.14	0
mu78	0.224423	0.000815884	275.067	0	0.999999999815169	0.998945133915074	-359936.14230435	26239	La_0
shape78	0.773822	0.000345128	2242.13	0	0.999999999815155
scale78	7.87219	0.00282607	2785.56	0
mu79	0.117848	0.000459096	256.696	0	0.999999999960401	0.999716940127483	-422642.667345301	26233	Lan_0
shape79	0.855058	0.000248911	3435.2	0	0.999999999960398
scale79	6.19514	0.00130436	4749.56	0
mu80	0.171972	0.00073968	232.494	0	0.99999999996336	0.999580171195737	-398255.126573497	26218	Ler_1
shape80	0.777795	0.000250311	3107.31	0	0.999999999963357
scale80	9.82694	0.00282676	3476.4	0
mu81	0.221197	0.000806262	274.349	0	0.999999999867143	0.99912969389461	-370262.30542576	26238	Li_2_1_bud
shape81	0.787707	0.000316401	2489.58	0	0.999999999867133
scale81	8.18925	0.00263563	3107.13	0
mu82	0.175905	0.000935002	188.134	0	0.999999999897856	0.999304500262087	-374519.890115902	26209	Litva
shape82	0.801425	0.000332093	2413.25	0	0.999999999897848
scale82	8.53416	0.00292369	2918.97	0
mu83	0.253916	0.00088264	287.678	0	0.99999999957348	0.998385978721477	-339400.953545771	26242	Litva_bud
shape83	0.767853	0.000401361	1913.12	0	0.999999999573447
scale83	7.22613	0.0030604	2361.17	0
mu84	0.229179	0.000776572	295.116	0	0.999999999814861	0.99896447861677	-360657.327771775	26234	Lm_2
shape84	0.778924	0.000347312	2242.72	0	0.999999999814847
scale84	7.81594	0.00280071	2790.7	0
mu85	0.173383	0.000836397	207.298	0	0.999999999860296	0.999205298712476	-369788.326773065	26203	Lp2_2
shape85	0.806121	0.000348005	2316.41	0	0.999999999860285
scale85	7.3056	0.00249366	2929.67	0
mu86	0.170942	0.000769875	222.039	0	0.999999999978216	0.99969813282022	-417237.621447994	26237	Mc_0
shape86	0.822389	0.000237023	3469.66	0	0.999999999978215
scale86	10.1869	0.00246536	4131.99	0
mu87	0.218987	0.000942107	232.444	0	0.999999999820532	0.999056713247413	-364841.04583654	26248	Mh_0_bud
shape87	0.827328	0.000369	2242.08	0	0.999999999820518
scale87	7.71129	0.00261744	2946.12	0
mu88	0.242669	0.000996318	243.566	0	0.999999999848772	0.999110411005215	-369896.50654829	26248	Ms_0_bud
shape88	0.837099	0.000356111	2350.67	0	0.99999999984876
scale88	8.26558	0.00261056	3166.21	0
mu89	0.218432	0.000722386	302.375	0	0.999999999796742	0.998952766543207	-360479.989264688	26237	Mz_0_bud
shape89	0.775361	0.000339829	2281.62	0	0.999999999796727
scale89	7.36244	0.00262209	2807.85	0
mu90	0.188939	0.000701795	269.222	0	0.999999999857166	0.999145830614163	-369143.281500388	26235	Nc_1_bud
shape90	0.779927	0.000318734	2446.95	0	0.999999999857155
scale90	7.59467	0.00251152	3023.94	0
mu91	0.234791	0.000896776	261.816	0	0.999999999786265	0.998886721231619	-355866.05583355	26232	Neo_6_bud
shape91	0.781115	0.000363128	2151.07	0	0.999999999786249
scale91	8.12909	0.00303968	2674.33	0
mu92	0.233684	0.000799625	292.242	0	0.999999999899223	0.999204045369829	-376691.988465003	26241	Nok_3_bud
shape92	0.805544	0.000296415	2717.62	0	0.999999999899215
scale92	9.04322	0.00260758	3468.05	0
mu93	0.30148	0.00128992	233.72	0	0.999999999451694	0.998175257147568	-332328.684003468	26243	Np_0_bud
shape93	0.828019	0.000496657	1667.18	0	0.999999999451652
scale93	7.50869	0.00339125	2214.14	0
mu94	0.231774	0.00109838	211.015	0	0.999999999801409	0.999085919709501	-366926.468565519	26241	Nw_0_bud
shape94	0.875098	0.000413349	2117.09	0	0.999999999801394
scale94	7.47584	0.00253074	2954.02	0
mu95	0.23237	0.000736867	315.349	0	0.999999999868325	0.999105287171423	-370324.144064465	26246	Ob_0_bud
shape95	0.790477	0.000312562	2529.03	0	0.999999999868315
scale95	8.32527	0.00261766	3180.42	0
mu96	0.243803	0.000986573	247.122	0	0.999999999753804	0.998856421563091	-355872.353590841	26239	Old_1_bud
shape96	0.808748	0.000385454	2098.17	0	0.999999999753785
scale96	7.90934	0.00288048	2745.84	0
mu97	0.238712	0.000693318	344.303	0	0.999999999941707	0.999343394093253	-386600.101032743	26241	Ove_0_bud
shape97	0.759815	0.000248668	3055.54	0	0.999999999941702
scale97	10.3058	0.00279427	3688.2	0
mu98	0.189052	0.000742018	254.781	0	0.999999999937655	0.999472868131397	-388221.046213642	26192	Per_1
shape98	0.787598	0.000288455	2730.4	0	0.99999999993765
scale98	8.86983	0.00274586	3230.26	0
mu99	0.194416	0.000591102	328.905	0	0.999999999970763	0.999571777997065	-405662.595347943	26187	Pi_0
shape99	0.773735	0.000213458	3624.77	0	0.999999999970761
scale99	9.9477	0.0022646	4392.71	0
mu100	0.258572	0.000869553	297.362	0	0.999999999849792	0.999027226787962	-365092.680913853	26244	Pla_0_bud
shape100	0.791631	0.000338922	2335.74	0	0.99999999984978
scale100	8.37813	0.00280709	2984.63	0
mu101	0.168403	0.000501737	335.64	0	0.999999999976486	0.999658431449424	-422619.662179539	26234	Pna_17_bud
shape101	0.820534	0.000191046	4294.95	0	0.999999999976484
scale101	8.98743	0.00160342	5605.16	0
mu102	0.263812	0.000934401	282.332	0	0.999999999701058	0.998586629837155	-348258.69703546	26234	Pog_0_bud
shape102	0.773996	0.000358245	2160.52	0	0.999999999701035
scale102	8.21262	0.00304701	2695.3	0
mu103	0.174012	0.0006532	266.399	0	0.999999999974894	0.999654764387865	-409601.011856788	26233	Pro_0_bud
shape103	0.791098	0.000255769	3093.02	0	0.999999999974892
scale103	10.4367	0.0029098	3586.72	0
mu104	0.156712	0.000717318	218.469	0	0.999999999848384	0.999334442845545	-379136.04632694	26196	Pt_0
shape104	0.816631	0.000327288	2495.14	0	0.999999999848373
scale104	6.84225	0.00213953	3198.01	0
mu105	0.23148	0.000916668	252.523	0	0.999999999788951	0.998974659792096	-357786.116653024	26241	Pu2_23
shape105	0.804965	0.000394615	2039.87	0	0.999999999788935
scale105	7.46834	0.00286253	2609	0
mu106	0.26983	0.0008006	337.035	0	0.999999999779926	0.99868895223308	-351334.807705887	26243	Pu2_23_bud
shape106	0.743549	0.000330496	2249.8	0	0.999999999779909
scale106	8.63083	0.00323205	2670.39	0
mu107	0.173406	0.000694617	249.643	0	0.999999999964999	0.999606299117224	-405355.762260877	26215	Pu2_7_bud
shape107	0.805126	0.000248479	3240.22	0	0.999999999964996
scale107	9.4325	0.00233664	4036.78	0
mu108	0.167692	0.000968898	173.075	0	0.999999999894494	0.999386774759953	-380113.044118992	26236	Ra_0
shape108	0.842111	0.000358736	2347.44	0	0.999999999894486
scale108	7.81758	0.00263155	2970.72	0
mu109	0.111866	0.000930348	120.241	0	0.999999999985395	0.999747627683823	-424042.732722732	26190	Ragl_1
shape109	0.814663	0.000216541	3762.18	0	0.999999999985394
scale109	10.8215	0.00214864	5036.43	0
mu110	0.356849	0.00101312	352.23	0	0.999999999656138	0.998296504373638	-339142.614669717	26242	Ragl_1_bud
shape110	0.743914	0.000369417	2013.75	0	0.999999999656112
scale110	9.20785	0.00382603	2406.63	0
mu111	-0.0994312	0.00116612	-85.2665	0	0.99999999998928	0.999697308921294	-428954.982855779	26141	Rd_0
shape111	0.895865	0.000231007	3878.09	0	0.99999999998928
scale111	15.6454	0.00250904	6235.63	0
mu112	0.231992	0.000863959	268.522	0	0.999999999821998	0.998922778619222	-362012.949709477	26240	Rennes_1_bud
shape112	0.792216	0.00032942	2404.88	0	0.999999999821984
scale112	8.45054	0.00277656	3043.53	0
mu113	0.244073	0.000788467	309.553	0	0.999999999824243	0.99898665762478	-361470.627093803	26236	Rld_1_bud
shape113	0.771723	0.000340645	2265.48	0	0.999999999824229
scale113	8.12771	0.00291287	2790.27	0
mu114	0.316639	0.00109607	288.886	0	0.999999999695142	0.998496323350907	-344867.920454765	26246	Rmx_A02_bud
shape114	0.786572	0.00038413	2047.67	0	0.999999999695119
scale114	8.90606	0.00344917	2582.09	0
mu115	0.252641	0.000850047	297.208	0	0.999999999836407	0.998962705006582	-364263.382754704	26243	Rome_1_bud
shape115	0.797722	0.000333768	2390.05	0	0.999999999836394
scale115	8.43559	0.00277487	3040	0
mu116	0.260724	0.00102293	254.879	0	0.999999999849995	0.999079096178327	-365015.065777094	26239	RRS_7
shape116	0.816798	0.000373758	2185.37	0	0.999999999849984
scale116	8.57022	0.0029905	2865.82	0
mu117	0.28522	0.000858705	332.152	0	0.999999999700703	0.998520161546799	-343297.318640585	26238	Rubezhnoe_1_bud
shape117	0.756468	0.000372727	2029.55	0	0.99999999970068
scale117	8.222	0.00337332	2437.36	0
mu118	0.247841	0.0010311	240.366	0	0.99999999981158	0.998967404426245	-358908.78433632	26232	Se_0_bud
shape118	0.801836	0.000379112	2115.04	0	0.999999999811566
scale118	8.25354	0.0030704	2688.1	0
mu119	0.186663	0.000798597	233.738	0	0.999999999891191	0.999279218779089	-377116.176719581	26240	Seattle_0
shape119	0.803573	0.000322328	2493.03	0	0.999999999891183
scale119	7.96361	0.00254876	3124.5	0
mu120	0.264662	0.000920431	287.542	0	0.999999999838102	0.998920306151786	-361450.613398391	26248	Sei_0_bud
shape120	0.788576	0.000330989	2382.49	0	0.99999999983809
scale120	9.05123	0.00300792	3009.13	0
mu121	0.324371	0.0018216	178.07	0	0.999999999619002	0.998723707829227	-348873.31787793	26251	Sg_1
shape121	0.93665	0.000558911	1675.85	0	0.999999999618973
scale121	7.98296	0.00328306	2431.56	0
mu122	0.145045	0.000805445	180.081	0	0.999999999963628	0.999638326576109	-403737.343960959	26206	Si_0
shape122	0.816239	0.000268965	3034.74	0	0.999999999963625
scale122	9.18563	0.00239385	3837.17	0
mu123	0.282959	0.000826584	342.323	0	0.999999999864784	0.998959758638183	-363006.309669336	26247	Sorbo_bud
shape123	0.7573	0.000309249	2448.84	0	0.999999999864774
scale123	9.7152	0.003293	2950.26	0
mu124	0.3302	0.000763231	432.634	0	0.999999999717973	0.998479180906542	-344694.483065597	26248	Sp_0_bud
shape124	0.764613	0.000346572	2206.22	0	0.999999999717952
scale124	8.84011	0.00336382	2628	0
mu125	0.307774	0.000896833	343.179	0	0.999999999686413	0.998378967328312	-342377.647875356	26239	Sq_8_bud
shape125	0.75638	0.00035618	2123.59	0	0.99999999968639
scale125	8.76526	0.00342637	2558.18	0
mu126	0.169131	0.000829608	203.868	0	0.999999999910899	0.999382468541218	-380275.778971358	26216	Stw_0
shape126	0.806501	0.000322008	2504.6	0	0.999999999910892
scale126	8.23051	0.00266064	3093.43	0
mu127	0.170345	0.000608203	280.078	0	0.999999999972042	0.999665573951748	-410682.745814663	26194	Su_0
shape127	0.788142	0.00023453	3360.52	0	0.99999999997204
scale127	9.09588	0.00234086	3885.71	0
mu128	0.31886	0.00120911	263.716	0	0.999999999558883	0.998255478229767	-335306.91438925	26247	Sus_1_bud
shape128	0.804074	0.000464511	1731.01	0	0.99999999955885
scale128	7.93382	0.00350634	2262.71	0
mu129	0.314519	0.00129781	242.347	0	0.999999999619337	0.998434381889444	-342410.22951585	26249	Ta_0_bud
shape129	0.822003	0.000431778	1903.76	0	0.999999999619308
scale129	8.5442	0.00339636	2515.7	0
mu130	0.212125	0.000710695	298.475	0	0.999999999962735	0.999467688374953	-397463.248152412	26233	Tamm_2_bud
shape130	0.777477	0.00022294	3487.39	0	0.999999999962732
scale130	10.6756	0.00248968	4287.95	0
mu131	0.378533	0.00138233	273.837	0	0.99999999961179	0.998374002153624	-340448.019746965	26247	Tol_0_bud
shape131	0.825031	0.000443147	1861.75	0	0.99999999961176
scale131	8.84878	0.00359183	2463.59	0
mu132	0.301729	0.000993865	303.591	0	0.999999999807711	0.998837591253135	-358485.044847541	26248	Tscha_1_bud
shape132	0.801279	0.000346644	2311.53	0	0.999999999807696
scale132	9.11231	0.00307916	2959.35	0
mu133	0.313617	0.000965545	324.808	0	0.999999999635538	0.998406132313084	-341190.584204933	26245	Tu_0_bud
shape133	0.756223	0.000375644	2013.14	0	0.99999999963551
scale133	8.56346	0.00350585	2442.62	0
mu134	0.343868	0.00121002	284.183	0	0.999999999547333	0.998244756122546	-336125.318338117	26245	Ty_0_bud
shape134	0.807239	0.000448036	1801.73	0	0.999999999547299
scale134	8.07623	0.00343722	2349.64	0
mu135	0.18357	0.000963183	190.587	0	0.999999999848193	0.999244323896314	-370743.688127627	26240	Uk_1
shape135	0.836726	0.000389343	2149.07	0	0.999999999848182
scale135	7.28968	0.00258414	2820.93	0
mu136	0.2901	0.00102311	283.546	0	0.999999999751246	0.998747825104882	-354097.043228239	26245	Uk_1_bud
shape136	0.811358	0.000374254	2167.93	0	0.999999999751227
scale136	8.41775	0.00298262	2822.27	0
mu137	0.336722	0.000846787	397.646	0	0.999999999745296	0.99852564665963	-346496.406471136	26245	Uod_1_bud
shape137	0.732077	0.000330405	2215.7	0	0.999999999745276
scale137	9.59596	0.0037332	2570.44	0
mu138	0.279901	0.00144792	193.312	0	0.999999999849766	0.999108094529317	-369053.376673108	26252	Utrecht_bud
shape138	0.891996	0.000408497	2183.61	0	0.999999999849755
scale138	9.38109	0.00303209	3093.94	0
mu139	0.378476	0.00123827	305.65	0	0.999999999433702	0.997983414081157	-329335.97045836	26246	Van_0_bud
shape139	0.792828	0.000463043	1712.21	0	0.999999999433659
scale139	8.03305	0.00366448	2192.14	0
mu140	0.170418	0.000701474	242.942	0	0.999999999960654	0.99957617765739	-400868.931596077	26190	Vind_1
shape140	0.803305	0.000255073	3149.31	0	0.999999999960651
scale140	9.11703	0.00237431	3839.87	0
mu141	0.226745	0.000989904	229.058	0	0.999999999672909	0.998678666016587	-345297.023953778	26238	Wa_1
shape141	0.798368	0.000431744	1849.17	0	0.999999999672884
scale141	7.14711	0.00304136	2349.97	0
mu142	0.327627	0.00117272	279.374	0	0.999999999530622	0.998260652684916	-334028.315390581	26242	Westkar_4_bud
shape142	0.791445	0.000458193	1727.32	0	0.999999999530586
scale142	8.06451	0.00364235	2214.09	0
mu143	0.346164	0.00125484	275.863	0	0.99999999955507	0.998267431974295	-337754.545522071	26246	Wl_0_bud
shape143	0.817565	0.000446004	1833.09	0	0.999999999555036
scale143	8.19979	0.00339892	2412.47	0
mu144	0.25999	0.000897439	289.702	0	0.999999999821016	0.998962288443047	-363439.662101823	26244	Ws_2_bud
shape144	0.807906	0.00034216	2361.2	0	0.999999999821003
scale144	8.25368	0.00270579	3050.38	0
mu145	0.193425	0.000893499	216.48	0	0.999999999837046	0.9991837202887	-367384.157994633	26237	Wt_5
shape145	0.813087	0.000377562	2153.52	0	0.999999999837034
scale145	7.47389	0.00273597	2731.71	0
mu146	0.160203	0.000858752	186.554	0	0.99999999993773	0.99952955609132	-393310.820386253	26208	Yo_0
shape146	0.827752	0.000299643	2762.46	0	0.999999999937725
scale146	8.10082	0.00236671	3422.82	0
mu147	0.182374	0.000840804	216.905	0	0.999999999877725	0.999260044502733	-373300.462869729	26236	Zdr_1
shape147	0.814332	0.000347884	2340.82	0	0.999999999877715
scale147	7.71618	0.00263432	2929.09	0
mu148	0.270981	0.000945444	286.618	0	0.999999999713179	0.99860990990529	-348077.52530349	26236	Zdr_1_bud
shape148	0.78714	0.000373613	2106.83	0	0.999999999713157
scale148	8.0857	0.00305076	2650.39	0
mu149	0.194208	0.000834137	232.826	0	0.999999999977265	0.999686664067651	-416434.633722536	26241	Er_0
shape149	0.844806	0.000251237	3362.59	0	0.999999999977263
scale149	10.3649	0.00244064	4246.8	0
mu150	0.252177	0.000803696	313.772	0	0.999999999838603	0.998988922470218	-363605.693198309	26243	Er_0_bud
shape150	0.771446	0.0003183	2423.64	0	0.99999999983859
scale150	8.48091	0.00282532	3001.75	0

[truncated: 2 more sheets: 4750bp, 5000bp]
